# Supplementary material for: Dependence of nucleosome mechanical stability on DNA mismatches
Source: eLife. 2024 Apr 24;13:RP95514. doi: 10.7554/eLife.95514 (PMC11042804; doi:10.7554/eLife.95514)
Supplement: Figure 1—figure supplement 1—source data 1. [file elife-95514-fig1-figsupp1-data1.xlsx]

## Sheet: Figure 1-figure supplement 1D
FRET efficiency	fraction (601)	FRET efficiency	fraction (601-R18)	FRET efficiency	fraction (601-R39)	FRET efficiency	fraction (601-R56)
-0.2	0	-0.2	0	-0.2	0	-0.2	0
-0.19	0	-0.19	0	-0.19	0	-0.19	0
-0.18	0	-0.18	0	-0.18	0	-0.18	0
-0.17	0	-0.17	0	-0.17	0	-0.17	0
-0.16	0	-0.16	0	-0.16	0	-0.16	0
-0.15	0	-0.15	0	-0.15	0	-0.15	0
-0.14	0	-0.14	0	-0.14	0	-0.14	0
-0.13	0	-0.13	0	-0.13	0	-0.13	0
-0.12	0	-0.12	0	-0.12	0.000121	-0.12	0
-0.11	0	-0.11	0	-0.11	0	-0.11	0
-0.1	0	-0.1	0	-0.1	0	-0.1	0
-0.09	0	-0.09	0	-0.09	0.000121	-0.09	0.000123
-0.08	0	-0.08	0	-0.08	0.000243	-0.08	0.000123
-0.07	0	-0.07	0	-0.07	0	-0.07	0.000123
-0.06	0.000495	-0.06	0	-0.06	0.000364	-0.06	0
-0.05	0	-0.05	0	-0.05	0.000486	-0.05	0.000246
-0.04	0.00132	-0.04	0.000192	-0.04	0.00134	-0.04	0.000615
-0.03	0.00165	-0.03	0.000288	-0.03	0.00085	-0.03	0.000615
-0.02	0.00313	-0.02	0.00106	-0.02	0.00231	-0.02	0.00258
-0.01	0.00429	-0.01	0.00221	-0.01	0.00401	-0.01	0.00221
0	0.00561	0	0.00441	0	0.00558	0	0.00344
0.01	0.00626	0.01	0.00537	0.01	0.00619	0.01	0.00467
0.02	0.0066	0.02	0.01085	0.02	0.01056	0.02	0.00664
0.03	0.01055	0.03	0.01104	0.03	0.0142	0.03	0.0075
0.04	0.01105	0.04	0.01747	0.04	0.01942	0.04	0.01365
0.05	0.01303	0.05	0.02063	0.05	0.02076	0.05	0.0166
0.06	0.01253	0.06	0.02514	0.06	0.02561	0.06	0.01893
0.07	0.01368	0.07	0.02812	0.07	0.02743	0.07	0.02004
0.08	0.01204	0.08	0.03119	0.08	0.02707	0.08	0.02471
0.09	0.01385	0.09	0.03513	0.09	0.02743	0.09	0.02164
0.1	0.01121	0.1	0.0334	0.1	0.03035	0.1	0.02582
0.11	0.0089	0.11	0.03234	0.11	0.0295	0.11	0.02803
0.12	0.01006	0.12	0.03676	0.12	0.02707	0.12	0.02557
0.13	0.00791	0.13	0.03311	0.13	0.02452	0.13	0.0193
0.14	0.00989	0.14	0.02975	0.14	0.02246	0.14	0.01906
0.15	0.00709	0.15	0.02889	0.15	0.01954	0.15	0.01832
0.16	0.0061	0.16	0.02313	0.16	0.01554	0.16	0.01475
0.17	0.00478	0.17	0.02169	0.17	0.01675	0.17	0.01402
0.18	0.00412	0.18	0.01766	0.18	0.0125	0.18	0.01168
0.19	0.00412	0.19	0.01555	0.19	0.01044	0.19	0.00996
0.2	0.00478	0.2	0.01219	0.2	0.00777	0.2	0.00947
0.21	0.00363	0.21	0.01257	0.21	0.0068	0.21	0.00811
0.22	0.00297	0.22	0.01085	0.22	0.00765	0.22	0.00602
0.23	0.00379	0.23	0.00883	0.23	0.00607	0.23	0.00627
0.24	0.00297	0.24	0.00816	0.24	0.00558	0.24	0.00615
0.25	0.00148	0.25	0.00662	0.25	0.00437	0.25	0.00467
0.26	0.00165	0.26	0.00528	0.26	0.00376	0.26	0.0043
0.27	0.00264	0.27	0.00518	0.27	0.00522	0.27	0.00295
0.28	0.00115	0.28	0.00365	0.28	0.00316	0.28	0.00246
0.29	0.00181	0.29	0.00374	0.29	0.00316	0.29	0.00258
0.3	0.00066	0.3	0.00326	0.3	0.00316	0.3	0.00283
0.31	0.00132	0.31	0.00365	0.31	0.00243	0.31	0.00283
0.32	0.00132	0.32	0.00346	0.32	0.00279	0.32	0.00234
0.33	0.000824	0.33	0.00384	0.33	0.00218	0.33	0.00209
0.34	0.000989	0.34	0.0023	0.34	0.00231	0.34	0.00184
0.35	0.00165	0.35	0.00288	0.35	0.00328	0.35	0.00246
0.36	0.00148	0.36	0.00173	0.36	0.00231	0.36	0.00332
0.37	0.00198	0.37	0.00259	0.37	0.00218	0.37	0.00209
0.38	0.000989	0.38	0.00182	0.38	0.00267	0.38	0.00172
0.39	0.00132	0.39	0.00182	0.39	0.00194	0.39	0.00148
0.4	0.000495	0.4	0.00115	0.4	0.00134	0.4	0.00111
0.41	0.00132	0.41	0.00115	0.41	0.00134	0.41	0.000984
0.42	0.00115	0.42	0.00154	0.42	0.00109	0.42	0.00184
0.43	0.00115	0.43	0.00163	0.43	0.00146	0.43	0.00148
0.44	0.00165	0.44	0.00154	0.44	0.00194	0.44	0.00111
0.45	0.00214	0.45	0.00125	0.45	0.00134	0.45	0.00111
0.46	0.000824	0.46	0.00211	0.46	0.0017	0.46	0.0027
0.47	0.00148	0.47	0.00182	0.47	0.000728	0.47	0.00135
0.48	0.00165	0.48	0.00134	0.48	0.00218	0.48	0.00184
0.49	0.00313	0.49	0.00173	0.49	0.0017	0.49	0.00209
0.5	0.00297	0.5	0.00192	0.5	0.00146	0.5	0.000984
0.51	0.00264	0.51	0.00163	0.51	0.00182	0.51	0.00148
0.52	0.00429	0.52	0.00154	0.52	0.00206	0.52	0.00123
0.53	0.00363	0.53	0.00182	0.53	0.00182	0.53	0.000861
0.54	0.00495	0.54	0.00115	0.54	0.00218	0.54	0.00221
0.55	0.00495	0.55	0.00106	0.55	0.00109	0.55	0.00123
0.56	0.00561	0.56	0.00144	0.56	0.00158	0.56	0.00209
0.57	0.00379	0.57	0.00134	0.57	0.00182	0.57	0.0016
0.58	0.00478	0.58	0.00125	0.58	0.00194	0.58	0.00258
0.59	0.00511	0.59	0.00134	0.59	0.0017	0.59	0.00258
0.6	0.0061	0.6	0.00144	0.6	0.00206	0.6	0.00221
0.61	0.00626	0.61	0.00125	0.61	0.00231	0.61	0.00209
0.62	0.00594	0.62	0.00106	0.62	0.00243	0.62	0.00184
0.63	0.00511	0.63	0.00134	0.63	0.00134	0.63	0.00209
0.64	0.00561	0.64	0.0023	0.64	0.00218	0.64	0.00148
0.65	0.00594	0.65	0.00154	0.65	0.00291	0.65	0.00258
0.66	0.00643	0.66	0.00182	0.66	0.00255	0.66	0.00246
0.67	0.00544	0.67	0.00288	0.67	0.00146	0.67	0.00369
0.68	0.00396	0.68	0.00201	0.68	0.00182	0.68	0.00332
0.69	0.00379	0.69	0.00249	0.69	0.00231	0.69	0.00393
0.7	0.00412	0.7	0.00221	0.7	0.00182	0.7	0.00369
0.71	0.00495	0.71	0.00374	0.71	0.00316	0.71	0.00541
0.72	0.00643	0.72	0.00365	0.72	0.00328	0.72	0.00357
0.73	0.00495	0.73	0.00374	0.73	0.00388	0.73	0.00627
0.74	0.00379	0.74	0.00432	0.74	0.00425	0.74	0.00602
0.75	0.00561	0.75	0.00528	0.75	0.00449	0.75	0.00836
0.76	0.00907	0.76	0.00614	0.76	0.00425	0.76	0.00971
0.77	0.0094	0.77	0.00614	0.77	0.00583	0.77	0.00934
0.78	0.01138	0.78	0.00796	0.78	0.00765	0.78	0.01291
0.79	0.01303	0.79	0.01152	0.79	0.00813	0.79	0.01414
0.8	0.01764	0.8	0.01305	0.8	0.00825	0.8	0.01881
0.81	0.01913	0.81	0.01689	0.81	0.01093	0.81	0.02237
0.82	0.02803	0.82	0.01939	0.82	0.01335	0.82	0.02705
0.83	0.03446	0.83	0.02034	0.83	0.0193	0.83	0.02803
0.84	0.04221	0.84	0.02227	0.84	0.021	0.84	0.03676
0.85	0.04963	0.85	0.02476	0.85	0.02209	0.85	0.03184
0.86	0.05276	0.86	0.02601	0.86	0.02816	0.86	0.03873
0.87	0.05688	0.87	0.02466	0.87	0.02561	0.87	0.03873
0.88	0.06447	0.88	0.02735	0.88	0.03108	0.88	0.03922
0.89	0.05359	0.89	0.02284	0.89	0.03265	0.89	0.03664
0.9	0.04798	0.9	0.02169	0.9	0.0335	0.9	0.03172
0.91	0.03578	0.91	0.01823	0.91	0.02756	0.91	0.02557
0.92	0.03001	0.92	0.0166	0.92	0.02683	0.92	0.01832
0.93	0.01863	0.93	0.01123	0.93	0.02586	0.93	0.01549
0.94	0.01154	0.94	0.01113	0.94	0.02282	0.94	0.01205
0.95	0.00857	0.95	0.00739	0.95	0.01845	0.95	0.00848
0.96	0.00429	0.96	0.00605	0.96	0.01226	0.96	0.00602
0.97	0.00363	0.97	0.00566	0.97	0.0102	0.97	0.00639
0.98	0.00148	0.98	0.00288	0.98	0.00753	0.98	0.00467
0.99	0.00247	0.99	0.00307	0.99	0.00643	0.99	0.00307
1	0.000824	1	0.00249	1	0.00413	1	0.0016
1.01	0.000495	1.01	0.00134	1.01	0.0034	1.01	0.00148
1.02	0.00033	1.02	0.000864	1.02	0.00255	1.02	0.00123
1.03	0.00033	1.03	0.000864	1.03	0.00085	1.03	0.000738
1.04	0	1.04	0.000192	1.04	0.00109	1.04	0.000123
1.05	0	1.05	0.000192	1.05	0.000728	1.05	0.000123
1.06	0.000165	1.06	0	1.06	0.000364	1.06	0.000123
1.07	0	1.07	0	1.07	0.000486	1.07	0.000123
1.08	0	1.08	9.6e-05	1.08	0.000121	1.08	0
1.09	0	1.09	0	1.09	0.000364	1.09	0
1.1	0	1.1	0	1.1	0	1.1	0
1.11	0	1.11	0	1.11	0.000121	1.11	0
1.12	0	1.12	0	1.12	0	1.12	0
1.13	0	1.13	0	1.13	0	1.13	0
1.14	0	1.14	0	1.14	0	1.14	0
1.15	0	1.15	0	1.15	0	1.15	0
1.16	0	1.16	9.6e-05	1.16	0	1.16	0
1.17	0	1.17	0	1.17	0	1.17	0
1.18	0	1.18	0	1.18	0	1.18	0
1.19	0	1.19	0	1.19	0	1.19	0
1.2	0	1.2	0	1.2	0	1.2	0
1.21	0	1.21	0	1.21	0	1.21	0
