# Supplementary material for: Dependence of nucleosome mechanical stability on DNA mismatches
Source: eLife. 2024 Apr 24;13:RP95514. doi: 10.7554/eLife.95514 (PMC11042804; doi:10.7554/eLife.95514)
Supplement: Figure 2—source data 1. [file elife-95514-fig2-data1.xlsx]

## Sheet: Figure 2A
force (pN) cycle1	FRET efficiency cycle1	force (pN) cycle6	FRET efficiency cycle6
0.96716	1.06816	0.9723	0.90763
0.8804	0.98324	1.19246	0.98569
1.06047	0.87895	0.93517	0.84094
0.87854	0.93246	1.09566	0.9231
0.84679	0.79664	1.09757	1.1644
0.88224	0.98201	0.94319	0.87116
0.71888	0.84094	1.06856	1.04479
0.90214	0.79621	1.14363	0.8683
0.88955	0.84245	1.21	0.95533
0.717	0.87568	0.90624	1.05024
0.93811	0.83991	1.08843	0.95054
0.8657	0.82442	1.15918	0.63614
0.90277	0.8355	1.10719	0.91503
1.00698	0.65899	1.16608	1.01189
1.02481	0.85952	1.04693	0.79467
1.15736	0.75484	1.18758	0.87568
1.01451	0.79232	1.38492	0.75642
1.00303	0.80972	1.35428	0.882
1.04634	0.66732	1.02218	0.87836
0.97401	0.82291	1.1379	0.86597
0.9622	0.74868	1.38102	0.95739
1.03108	0.83613	1.40297	1.09809
1.03025	1.01315	1.18185	0.86042
1.24788	0.85081	1.34723	0.9248
1.19206	0.7027	1.43736	0.82343
1.23895	0.78993	1.47182	0.8405
1.27712	0.96136	1.48129	0.89239
1.35761	0.83855	1.3745	0.84489
1.21715	0.74868	1.49278	1.0404
1.34159	0.92417	1.2803	0.5721
1.26248	0.78211	1.54981	0.95928
1.4692	0.8482	1.67979	1.01086
1.48647	1.09287	1.6794	0.6869
1.45647	0.48953	1.7672	0.77341
1.49715	0.77301	1.57899	0.8068
1.42927	0.79042	1.61264	0.92599
1.40568	0.9025	1.7373	0.83808
1.39709	0.83766	1.87835	0.7251
1.4154	0.97347	1.82037	0.99854
1.44413	0.95171	1.88182	0.7639
1.48859	0.87116	1.91697	1.0755
1.65462	0.59538	1.95842	1.09873
1.64669	0.80696	1.7866	1.28925
1.63835	0.73728	1.91446	1.07831
1.83402	0.88543	1.98295	0.75843
1.71698	0.7314	2.00191	0.79765
1.79147	0.84682	1.92242	0.61448
1.91037	1.0127	2.11717	0.80324
2.0338	0.82253	2.15153	0.87836
1.90396	0.69584	2.12837	0.94054
1.71658	0.67135	2.29111	0.53591
1.94883	0.83855	2.25958	0.74604
1.81973	0.77769	2.34408	1.11844
1.96206	0.81327	2.41794	1.18922
1.98411	0.73336	2.37154	1.09287
2.18545	0.85952	2.6188	0.882
2.18692	0.77997	2.5194	0.83332
2.24094	0.7885	2.63685	0.99757
2.16668	0.65462	2.60869	0.96994
2.1491	0.93531	2.80376	0.83167
2.16431	0.99581	2.70686	0.79467
2.25472	0.68924	2.85268	0.85089
2.40822	0.69664	2.90137	0.87492
2.3746	0.75843	2.92284	0.9398
2.50949	0.81074	3.04467	0.89735
2.33393	0.82291	3.19723	1.00973
2.46003	0.93812	3.26278	0.92808
2.74741	0.92808	3.27445	0.83991
2.74967	0.86351	3.34677	0.96559
2.88994	1.24852	3.54392	1.01153
2.91265	0.63342	3.46456	1.18139
2.88393	0.62887	3.58578	1.24852
2.98875	0.70582	3.58519	0.84257
2.95307	0.64794	3.86932	0.85967
2.94708	0.67509	3.92218	0.94139
3.22867	0.83166	4.08284	1.06601
3.30612	0.59547	4.24666	0.91854
3.57246	0.72747	4.36211	0.89818
3.43432	0.58196	4.48943	0.80462
3.39495	0.74808	4.45986	0.76606
3.66468	0.80092	4.58238	0.7956
3.68587	0.64139	4.87941	0.86126
3.73591	0.25058	4.99599	0.80696
3.86096	0.78386	5.1438	1.158
4.15741	-0.05938	5.21221	1.00999
4.14898	0.6869	5.43226	0.86963
4.35577	0.75028	5.52448	0.98719
4.35533	0.03385	5.71542	0.91517
4.43043	0.79017	5.85333	0.87116
4.46966	0.5895	6.08618	0.75484
4.77314	0.23324	6.10882	0.97059
5.0076	-2.6e-05	6.54753	1.07915
5.10619	0.81721	6.88272	0.86728
5.00338	0.13284	6.85959	0.92889
5.35271	0.49445	7.23807	0.77323
5.5205	0.76677	7.55648	1.19389
5.76439	0.54003	7.64971	0.89172
5.79319	0.07008	8.56687	0.87736
5.91463	0.11897	8.60218	1.01153
6.10337	0.13324	8.99503	0.99005
6.26423	0.18086	9.23311	0.948
6.32219	-0.04521	9.60574	1.01744
6.723	0.03043	9.67321	0.98059
6.95986	0.0064	10.2714	0.78801
7.07922	-0.05379	10.4517	1.05865
7.1681	0.02696	10.7762	1.05024
7.53396	0.1447	11.0972	0.86963
7.68938	0.04537	11.3507	0.8167
7.8434	-0.0023	11.6505	0.97122
8.13414	0.07517	12.2696	1.06364
8.53914	0.03038	12.5917	0.75233
8.67124	0.11069	13.0406	0.91736
8.85051	0.1136	13.312	0.94559
9.12111	0.05517	13.2685	0.15237
9.49744	0.0874	13.664	0.24384
9.64922	0.25197	13.9603	0.09774
9.89571	0.44071	14.3938	0.04069
10.2443	0.52429	14.8326	0.03051
10.6919	0.68738	15.0925	-0.04521
10.9753	0.8562	15.6665	0.07082
11.3451	0.948	16.1382	-0.02614
11.4973	0.79232	16.6293	0.14777
11.8511	0.18453	17.1749	0.09064
12.2884	0.01966	17.7556	0.04087
12.5966	0.33544	18.3272	0.11897
12.9093	0.27588	19.1729	0.13823
13.5734	0.10691	19.2935	-0.04142
13.6507	0.32493	20.2706	0.11897
13.9649	0.3068	20.7832	0.39229
14.3038	0.17923	21.2898	0.03412
14.7158	0.12789	22.1121	0.06444
15.1629	0.20517
15.5947	0.12938
16.0301	0.06797
16.585	0.11591
17.0642	0.01852
16.8797	0.10691
17.484	0.33545
18.0071	-0.0384
18.4169	0.09879
19.2683	0.11474
19.6221	0.03385
19.8128	0.18043
20.9195	0.00261
21.6701	0.15644
22.139	0.06257

## Sheet: Figure 2B
force (pN) cycles1,2,3	FRET efficiency cycle1,2,3	error	force (pN) cycles5+	FRET efficiency cycles5+	error
0.15	0.81921	0.02208	0.15	0.86326	0.0978
0.65	0.81668	0.00991	0.65	0.80608	0.01479
1.15	0.85769	0.02558	1.15	0.85446	0.01677
1.65	0.81918	0.012	1.65	0.84899	0.02091
2.15	0.78848	0.01381	2.15	0.83885	0.02106
2.65	0.72743	0.01926	2.65	0.82923	0.01775
3.15	0.70537	0.02151	3.15	0.87951	0.02863
3.65	0.5963	0.02854	3.65	0.83715	0.03148
4.15	0.55393	0.03827	4.15	0.83145	0.02006
4.65	0.52072	0.03776	4.65	0.82317	0.03815
5.15	0.53812	0.03797	5.15	0.75949	0.04777
5.65	0.48421	0.04133	5.65	0.80803	0.04058
6.15	0.49856	0.0475	6.15	0.8218	0.04009
6.65	0.48294	0.04732	6.65	0.8465	0.05763
7.15	0.52532	0.05541	7.15	0.80742	0.07899
7.65	0.43961	0.05578	7.65	0.76352	0.07165
8.15	0.5294	0.05445	8.15	0.79238	0.06168
8.65	0.43917	0.06187	8.65	0.82634	0.03673
9.15	0.39354	0.05643	9.15	0.90142	0.04125
9.65	0.45122	0.06036	9.65	0.80804	0.04222
10.15	0.41096	0.05362	10.15	0.8588	0.04142
10.65	0.46139	0.05919	10.65	0.75902	0.12685
11.15	0.34849	0.06041	11.15	0.62251	0.11215
11.65	0.2966	0.06746	11.65	0.65097	0.09775
12.15	0.33425	0.09001	12.15	0.73558	0.12387
12.65	0.40915	0.05676	12.65	0.58432	0.17578
13.15	0.32233	0.06005	13.15	0.65337	0.10543
13.65	0.29054	0.07756	13.65	0.44223	0.1419
14.15	0.31029	0.06066	14.15	0.53988	0.2286
14.65	0.37111	0.05757	14.65	0.50365	0.16162
15.15	0.25153	0.06192	15.15	0.68907	0.18949
15.65	0.27356	0.04233	15.65	0.56397	0.22769
16.15	0.3039	0.0529	16.15	0.5554	0.11281
16.65	0.22155	0.05592	16.65	0.35744	0.17055
17.15	0.28133	0.06132	17.15	0.44952	0.16849
17.65	0.2547	0.07134	17.65	0.31595	0.27509
18.15	0.29163	0.06514	18.15	0.41056	0.16012
18.65	0.23232	0.0798	18.65	0.24634	0.17055
19.15	0.24184	0.06365	19.15	0.09456	0.14899
19.65	0.28513	0.07872	19.65	0.32099	0.1897
20.15	0.2103	0.06439	20.15	0.0487	0.03522
20.65	0.21317	0.07205	20.65	0.04148	0.14208
21.15	0.16156	0.06508	21.15	0.13347	0.06928
21.65	0.34167	0.13464	21.65	0.02452	0.02175
22.15	0.25153	0.06063	22.65	0.29958	0.14051
22.65	0.21587	0.07572	23.15	0.3856	NaN
23.15	0.2158	0.09353	23.65	0.41007	NaN
23.65	0.21558	0.0712	24.15	0.37145	0.1137
24.15	0.04127	0.19788	25.15	0.06396	0.14651
24.65	0.13932	0.19657	25.65	0.54738	NaN
25.15	0.31638	0.09301	26.15	0.45176	0.10155
25.65	0.27036	0.25311	26.65	0.09049	NaN
26.15	0.29901	0.09871	27.15	0.07706	NaN
27.15	0.14689	NaN	28.15	0.15317	NaN
27.65	0.12444	NaN	28.65	0.00756	0.22298
28.15	-0.27195	0.18987
29.15	0.21302	NaN
30.15	1.19416	NaN
31.15	-0.00603	NaN
