# Supplementary material for: Dependence of nucleosome mechanical stability on DNA mismatches
Source: eLife. 2024 Apr 24;13:RP95514. doi: 10.7554/eLife.95514 (PMC11042804; doi:10.7554/eLife.95514)
Supplement: Figure 3—source data 1. [file elife-95514-fig3-data1.xlsx]

## Sheet: Figure 3A
force (pN) ED1 601	FRET efficiency 601	error	force (pN) ED1 601-R39	FRET efficiency 601-R39	error
0.45	0.82184	0.0162	0.65	0.79074	0.01444
0.75	0.8167	0.01508	1.15	0.79698	0.01678
1.05	0.80844	0.01821	1.65	0.76566	0.02072
1.35	0.77377	0.03233	2.15	0.77612	0.02016
1.65	0.7398	0.02918	2.65	0.71246	0.03286
1.95	0.74033	0.02944	3.15	0.67362	0.04533
2.25	0.62692	0.04414	3.65	0.6754	0.04138
2.55	0.53243	0.05297	4.15	0.58557	0.05894
2.85	0.43621	0.06112	4.65	0.52789	0.05835
3.15	0.38587	0.05939	5.15	0.65872	0.05853
3.45	0.28598	0.06052	5.65	0.55594	0.0584
3.75	0.1897	0.05897	6.15	0.52823	0.07512
4.05	0.1849	0.04621	6.65	0.51956	0.08015
4.65	0.13042	0.04945	7.15	0.49548	0.11256
4.95	0.15335	0.06143	7.65	0.46066	0.09954
5.25	0.12458	0.04659	8.15	0.55829	0.05958
5.55	0.10226	0.03325	8.65	0.42816	0.08537
6.15	0.09903	0.04962	9.15	0.47208	0.07418
6.45	0.04399	0.03356	9.65	0.48145	0.06996
6.75	0.03328	0.03129	10.15	0.54053	0.0807
7.05	0.0823	0.0405	10.65	0.60067	0.07513
7.35	0.09912	0.04635	11.15	0.60307	0.09507
7.65	0.07636	0.02144	11.65	0.54922	0.12765
7.95	0.03662	0.02787	12.15	0.38346	0.07884
8.25	0.07398	0.04484	12.65	0.56366	0.09047
8.55	0.08207	0.03864	13.15	0.43467	0.15833
8.85	0.09388	0.05183	13.65	0.38723	0.07589
9.15	0.09323	0.0425	14.15	0.41823	0.0982
9.45	0.00984	0.04392	14.65	0.38406	0.13051
9.75	0.00235	0.05146	15.15	0.37827	0.09466
10.05	0.01348	0.05058	15.65	0.3037	0.08616
10.35	0.03682	0.05156	16.15	0.35762	0.11538
10.65	0.08192	0.08418	16.65	0.27258	0.08521
10.95	-0.01617	0.04896	17.15	0.29957	0.09181
11.25	0.04996	0.02561	17.65	0.31381	0.15693
11.55	0.0846	0.03106	18.15	0.26753	0.11601
11.85	0.02948	0.06427	18.65	0.31451	0.08211
12.15	0.09872	0.06393	19.15	0.41643	0.11691
12.45	0.03459	0.02371	19.65	0.12472	0.0562
12.75	0.05862	0.03501	20.15	0.39559	0.16614
13.05	0.04929	0.06188	20.65	0.25098	0.11483
13.35	0.0294	0.0421	21.15	0.19222	0.01838
13.65	-0.08077	0.04996	21.65	0.22424	0.09896
13.95	-0.00511	0.04729	22.15	0.21604	0.11893
14.25	0.0126	0.07489	22.65	0.18938	0.12887
14.55	0.11457	0.09996	23.15	0.51129	0.16283
14.85	-0.03379	0.075	23.65	-0.08168	NaN
15.15	0.06059	0.05758	24.15	0.41194	0.09169
15.45	-0.12545	0.08551	24.65	0.30208	0.11828
15.75	-0.01473	0.05128	25.15	0.68019	NaN
16.05	0.0107	0.12787	25.65	0.5989	NaN
16.35	-0.09925	0.03891	26.15	0.49289	NaN
16.65	-0.00789	0.08742	27.65	0.6414	NaN
16.95	0.12401	NaN

## Sheet: Figure 3B
force (pN) ED2 601	FRET efficiency 601	error	force (pN) ED2 601-R39	FRET efficiency 601-R39	error
0.15	0.89466	0.01615	0.15	0.99774	0.1183
0.45	0.90912	0.00823	0.65	0.90571	0.02372
0.75	0.89173	0.0087	1.15	0.83236	0.05433
1.05	0.92422	0.0094	1.65	0.83847	0.04627
1.35	0.95416	0.01047	2.15	0.91581	0.04659
1.65	0.93585	0.01379	2.65	0.75152	0.1094
1.95	0.91526	0.01074	3.15	0.83277	0.07655
2.25	0.92265	0.0117	3.65	0.71698	0.11495
2.55	0.92487	0.01269	4.15	0.7958	0.05634
2.85	0.8712	0.02626	4.65	0.8463	0.03358
3.15	0.88978	0.02626	5.15	0.88559	0.03908
3.45	0.86877	0.03033	5.65	0.8192	0.04644
3.75	0.89202	0.02667	6.15	0.81309	0.03839
4.05	0.86597	0.03595	6.65	0.80715	0.03359
4.35	0.87757	0.04138	7.15	0.81063	0.05519
4.65	0.8785	0.03714	7.65	0.7643	0.04742
4.95	0.89932	0.02985	8.15	0.90199	0.08617
5.25	0.86151	0.04262	8.65	0.76377	0.06762
5.55	0.85999	0.04906	9.15	0.83314	0.06449
5.85	0.83784	0.0404	9.65	0.73447	0.05669
6.15	0.89041	0.04758	10.15	0.86278	0.07448
6.45	0.86484	0.04631	10.65	0.82004	0.11732
6.75	0.86707	0.04345	11.15	0.75715	0.0513
7.05	0.87062	0.04752	11.65	0.72409	0.09204
7.35	0.91924	0.05521	12.15	0.6263	0.06702
7.65	0.86461	0.05036	12.65	0.63471	0.07263
7.95	0.88861	0.05369	13.15	0.73126	0.09856
8.25	0.88734	0.05103	13.65	0.586	0.08349
8.55	0.87378	0.04753	14.15	0.61226	0.08067
8.85	0.82352	0.08542	14.65	0.58804	0.14463
9.15	0.9893	0.02521	15.15	0.47125	0.0803
9.45	0.88113	0.06109	15.65	0.51822	0.08008
9.75	0.87819	0.06682	16.15	0.65937	0.17403
10.05	0.89438	0.02371	16.65	0.51343	0.0884
10.35	0.83565	0.08057	17.15	0.49758	0.08157
10.65	0.86601	0.06047	17.65	0.42056	0.13594
10.95	0.84631	0.07058	18.15	0.44799	0.07994
11.25	0.88958	0.08409	18.65	0.34173	0.12173
11.55	0.94848	0.02009	19.15	0.41405	0.14827
11.85	0.8817	0.08449	19.65	0.20362	0.07421
12.15	0.83323	0.0694	20.15	0.22053	0.06189
12.45	0.85226	0.10466	20.65	0.17395	0.12755
12.75	0.92017	0.03293	21.15	0.15805	0.06946
13.05	0.8284	0.11037	21.65	0.16171	0.07433
13.35	0.86345	0.07259	22.15	0.1934	0.05783
13.65	0.80924	0.07779	22.65	0.18647	0.06031
13.95	0.84347	0.09755	23.15	0.14854	0.04462
14.25	0.6532	0.13614	23.65	0.06021	0.09981
14.55	0.7445	0.08106	24.15	0.09227	0.03501
14.85	0.49268	0.14995	24.65	0.10119	0.08063
15.15	0.68515	0.09277	25.15	0.1274	NaN
15.45	0.66352	0.13782	25.65	0.04129	0.10589
15.75	0.51619	0.14649	26.15	0.0889	NaN
16.05	0.63622	0.10234	26.65	-0.11146	0.01961
16.35	0.42398	0.12599	27.15	0.02779	NaN
16.65	0.55772	0.09115	27.65	0.62905	0.55554
16.95	0.29928	0.10623	28.15	0.01084	NaN
17.25	0.42556	0.12221	28.65	0.00332	0.16373
17.55	0.36611	0.12673	29.65	-0.09748	NaN
17.85	0.51616	0.11102	30.65	-0.11026	NaN
18.15	0.39998	0.11618	32.15	0.10208	NaN
18.45	0.59524	0.29709	33.65	-0.02847	NaN
19.05	0.30433	NaN	35.65	0.1662	NaN
19.65	0.18518	NaN	36.65	-0.00627	NaN
20.25	0.40409	NaN	38.15	-0.00627	NaN
20.85	0.02559	NaN
21.45	-0.02093	NaN
21.75	0.25332	NaN
