# Supplementary material for: Dependence of nucleosome mechanical stability on DNA mismatches
Source: eLife. 2024 Apr 24;13:RP95514. doi: 10.7554/eLife.95514 (PMC11042804; doi:10.7554/eLife.95514)
Supplement: Figure 4—source data 1. [file elife-95514-fig4-data1.xlsx]

## Sheet: Figure 4
force (pN) 601	FRET efficiency 601	error	force (pN) 601-R18	FRET efficiency 601-R18	error	force (pN) 601-R39	FRET efficiency 601-R39	error	force (pN) 601-R56	FRET efficiency 601-R56	error
0.45	0.82184	0.0162	0.65	0.82817	0.01182	0.65	0.79074	0.01444	0.65	0.84089	0.01138
0.75	0.8167	0.01508	1.15	0.84154	0.00969	1.15	0.79698	0.01678	1.15	0.83511	0.00924
1.05	0.80844	0.01821	1.65	0.80905	0.01409	1.65	0.76566	0.02072	1.65	0.83334	0.01275
1.35	0.77377	0.03233	2.15	0.76928	0.01576	2.15	0.77612	0.02016	2.15	0.82528	0.01742
1.65	0.7398	0.02918	2.65	0.74968	0.02571	2.65	0.71246	0.03286	2.65	0.80266	0.02018
1.95	0.74033	0.02944	3.15	0.74171	0.02919	3.15	0.67362	0.04533	3.15	0.77704	0.02316
2.25	0.62692	0.04414	3.65	0.66248	0.03297	3.65	0.6754	0.04138	3.65	0.70208	0.03376
2.55	0.53243	0.05297	4.15	0.55075	0.04263	4.15	0.58557	0.05894	4.15	0.63964	0.04264
2.85	0.43621	0.06112	4.65	0.56701	0.04468	4.65	0.52789	0.05835	4.65	0.68591	0.03753
3.15	0.38587	0.05939	5.15	0.48649	0.05174	5.15	0.65872	0.05853	5.15	0.54825	0.05502
3.45	0.28598	0.06052	5.65	0.3719	0.06032	5.65	0.55594	0.0584	5.65	0.47124	0.0643
3.75	0.1897	0.05897	6.15	0.42716	0.06107	6.15	0.52823	0.07512	6.15	0.39869	0.08126
4.05	0.1849	0.04621	6.65	0.35276	0.06326	6.65	0.51956	0.08015	6.65	0.41115	0.06239
4.65	0.13042	0.04945	7.15	0.30834	0.0653	7.15	0.49548	0.11256	7.15	0.42387	0.07124
4.95	0.15335	0.06143	7.65	0.34048	0.05361	7.65	0.46066	0.09954	7.65	0.25724	0.06493
5.25	0.12458	0.04659	8.15	0.3149	0.06411	8.15	0.55829	0.05958	8.15	0.45713	0.06931
5.55	0.10226	0.03325	8.65	0.27975	0.0626	8.65	0.42816	0.08537	8.65	0.32602	0.10531
6.15	0.09903	0.04962	9.15	0.42575	0.08338	9.15	0.47208	0.07418	9.15	0.4785	0.09135
6.45	0.04399	0.03356	9.65	0.37134	0.08411	9.65	0.48145	0.06996	9.65	0.48136	0.08777
6.75	0.03328	0.03129	10.15	0.31621	0.07375	10.15	0.54053	0.0807	10.15	0.33741	0.07458
7.05	0.0823	0.0405	10.65	0.30862	0.07547	10.65	0.60067	0.07513	10.65	0.41951	0.11695
7.35	0.09912	0.04635	11.15	0.35064	0.08225	11.15	0.60307	0.09507	11.15	0.2951	0.0821
7.65	0.07636	0.02144	11.65	0.19647	0.06376	11.65	0.54922	0.12765	11.65	0.36675	0.07631
7.95	0.03662	0.02787	12.15	0.34503	0.07233	12.15	0.38346	0.07884	12.15	0.31753	0.08035
8.25	0.07398	0.04484	12.65	0.23492	0.07472	12.65	0.56366	0.09047	12.65	0.35297	0.11909
8.55	0.08207	0.03864	13.15	0.28237	0.05301	13.15	0.43467	0.15833	13.15	0.14367	0.08724
8.85	0.09388	0.05183	13.65	0.21074	0.04649	13.65	0.38723	0.07589	13.65	0.21089	0.12527
9.15	0.09323	0.0425	14.15	0.2264	0.0617	14.15	0.41823	0.0982	14.15	0.32949	0.13363
9.45	0.00984	0.04392	14.65	0.25979	0.12336	14.65	0.38406	0.13051	14.65	0.23348	0.13589
9.75	0.00235	0.05146	15.15	0.22727	0.07494	15.15	0.37827	0.09466	15.15	0.25393	0.11253
10.05	0.01348	0.05058	15.65	0.26654	0.07861	15.65	0.3037	0.08616	15.65	0.25424	0.07028
10.35	0.03682	0.05156	16.15	0.18445	0.05405	16.15	0.35762	0.11538	16.15	0.28306	0.09569
10.65	0.08192	0.08418	16.65	0.14175	0.06352	16.65	0.27258	0.08521	16.65	0.30541	0.09751
10.95	-0.01617	0.04896	17.15	0.13354	0.0879	17.15	0.29957	0.09181	17.15	0.06875	0.0844
11.25	0.04996	0.02561	17.65	0.21533	0.09298	17.65	0.31381	0.15693	17.65	0.3263	0.09874
11.55	0.0846	0.03106	18.15	0.1647	0.06989	18.15	0.26753	0.11601	18.15	0.11025	0.12486
11.85	0.02948	0.06427	18.65	0.17658	0.05002	18.65	0.31451	0.08211	18.65	0.06418	0.11513
12.15	0.09872	0.06393	19.15	-0.000811	0.08502	19.15	0.41643	0.11691	19.15	0.21474	0.12759
12.45	0.03459	0.02371	19.65	0.0443	0.06131	19.65	0.12472	0.0562	19.65	0.12658	0.11277
12.75	0.05862	0.03501	20.15	0.06458	0.08686	20.15	0.39559	0.16614	20.15	0.21681	0.145
13.05	0.04929	0.06188	20.65	0.13204	0.05629	20.65	0.25098	0.11483	20.65	0.11746	0.11288
13.35	0.0294	0.0421	21.15	0.01907	0.19038	21.15	0.19222	0.01838	21.15	-0.00259	0.05805
13.65	-0.08077	0.04996	21.65	0.17053	0.07276	21.65	0.22424	0.09896	21.65	0.20963	0.14549
13.95	-0.00511	0.04729	22.15	0.08607	0.06673	22.15	0.21604	0.11893	22.15	0.07717	0.09726
14.25	0.0126	0.07489	22.65	0.04631	0.00509	22.65	0.18938	0.12887	22.65	-0.00681	0.10101
14.55	0.11457	0.09996	23.65	-0.06923	NaN	23.15	0.51129	0.16283	23.15	0.19571	0.14145
14.85	-0.03379	0.075	25.65	0.13735	NaN	23.65	-0.08168	NaN	23.65	0.10306	0.03526
15.15	0.06059	0.05758				24.15	0.41194	0.09169	24.15	0.22014	0.12337
15.45	-0.12545	0.08551				24.65	0.30208	0.11828	24.65	0.21721	0.12575
15.75	-0.01473	0.05128				25.15	0.68019	NaN	25.15	0.05317	0.03112
16.05	0.0107	0.12787				25.65	0.5989	NaN	25.65	0.17472	NaN
16.35	-0.09925	0.03891				26.15	0.49289	NaN	26.65	-0.15488	NaN
16.65	-0.00789	0.08742				27.65	0.6414	NaN	27.65	0.10181	NaN
16.95	0.12401	NaN							28.15	-0.06219	NaN
									29.65	-0.384	NaN
