# Supplementary material for: Dependence of nucleosome mechanical stability on DNA mismatches
Source: eLife. 2024 Apr 24;13:RP95514. doi: 10.7554/eLife.95514 (PMC11042804; doi:10.7554/eLife.95514)
Supplement: Figure 5—figure supplement 1—source data 1. [file elife-95514-fig5-figsupp1-data1.xlsx]

## Sheet: Figure 1B
time (s)	force (pN)	FRET efficiency
0.044	0.08905	0.75524
0.088	0.11422	0.62838
0.132	0.16716	0.64286
0.176	0.08098	0.54545
0.22	0.18385	0.75578
0.264	0.17305	0.80769
0.308	0.14589	0.73118
0.352	0.09374	0.67153
0.396	0.21279	0.74747
0.44	0.18847	0.83791
0.484	0.44469	0.80826
0.528	0.18246	0.86014
0.572	0.47635	0.72464
0.616	0.45258	0.67866
0.66	0.32767	0.80447
0.704	0.26802	0.84018
0.748	0.45747	0.73088
0.792	0.16171	0.70309
0.836	0.36744	0.75992
0.88	0.5018	0.75806
0.924	0.43844	0.86667
0.968	0.30013	0.6384
1.012	0.53622	0.80106
1.056	0.52665	0.82353
1.1	0.54625	0.68391
1.144	0.47327	0.79592
1.188	0.62817	0.77855
1.232	0.45559	0.7769
1.276	0.75419	0.96333
1.32	0.40665	0.78378
1.364	0.49816	0.40801
1.408	0.57774	0.63768
1.452	0.58124	0.73973
1.496	0.71155	0.80556
1.54	0.76006	0.65426
1.584	0.64432	0.76298
1.628	1.01268	0.64198
1.672	0.70621	0.78142
1.716	0.75913	0.87535
1.76	0.77753	0.80952
1.804	0.88536	0.67681
1.848	0.77573	0.83491
1.892	0.85172	0.67312
1.936	0.79263	1
1.98	0.85476	0.77454
2.024	0.76695	0.77573
2.068	0.99593	0.91279
2.112	0.87652	0.62916
2.156	0.70344	0.82667
2.2	0.94283	0.74074
2.244	0.97141	0.71939
2.288	0.98202	0.8265
2.332	1.10938	0.87654
2.376	0.98438	0.56954
2.42	1.14549	0.71526
2.464	1.1275	0.77273
2.508	1.24105	0.83395
2.552	1.32255	0.90099
2.596	1.45169	0.75325
2.64	1.43723	0.8169
2.684	1.35878	0.65969
2.728	1.33986	0.80132
2.772	1.43843	0.78652
2.816	1.48192	0.70449
2.86	1.49989	0.58763
2.904	1.5632	0.89614
2.948	1.59469	0.73054
2.992	1.66545	0.82143
3.036	1.55369	0.64151
3.08	1.59351	0.87719
3.124	1.87631	0.7185
3.168	1.85071	0.7806
3.212	1.87494	0.81605
3.256	2.01303	0.85714
3.3	2.02689	0.64531
3.344	1.93863	0.8
3.388	2.09956	0.9422
3.432	2.21027	0.85788
3.476	2.2657	0.6281
3.52	2.4188	0.78372
3.564	2.34764	0.71429
3.608	2.36503	0.65839
3.652	2.63718	0.79885
3.696	2.57812	0.72892
3.74	2.68411	0.87365
3.784	2.81219	0.66825
3.828	2.87867	0.67066
3.872	2.9003	0.82143
3.916	3.0348	0.64706
3.96	3.3285	0.92593
4.004	3.20972	0.60145
4.048	3.36701	0.73538
4.092	3.53258	0.61111
4.136	3.62747	0.70339
4.18	3.60407	0.58333
4.224	3.77766	0.65909
4.268	3.83667	0.68227
4.312	3.94872	0.64135
4.356	4.105	0.16974
4.4	4.17978	0.56349
4.444	4.49443	0.57831
4.488	4.60233	0.25587
4.532	4.86218	0.40994
4.576	4.86004	0.73684
4.62	5.13659	0.40129
4.664	5.17873	0.19162
4.708	5.43609	0.42857
4.752	5.62245	0.375
4.796	5.88002	0.37262
4.84	6.07267	0
4.884	6.32024	0.04255
4.928	6.53711	0.00576
4.972	6.83475	0.14384
5.016	6.99017	0.07583
5.06	7.28976	0.04762
5.104	7.68848	0.02597
5.148	7.86203	0
5.192	8.02505	0
5.236	8.49125	0.10188
5.28	8.79909	0.49871
5.324	9.15491	-0.01563
5.368	9.41049	-0.06061
5.412	9.67967	-0.03175
5.456	10.1736	-0.01307
5.5	10.5178	0.02098
5.544	10.8131	0.02985
5.588	11.1992	0.03846
5.632	11.6175	0.10959
5.676	12.1163	-0.03053
5.72	12.4677	0.06977
5.764	12.3684	-0.06061
5.808	12.9263	-0.02273
5.852	13.2657	-0.17886
5.896	13.5893	0.02235
5.94	14.0444	-0.01476
5.984	14.6015	0.09396
6.028	15.1172	-0.09053
6.072	15.6984	0.05904
6.116	16.3123	0.0625
6.16	16.6271	-0.01563
6.204	16.8849	-0.14943
6.248	16.3751	-0.01942
6.292	15.8284	-0.00962
6.336	15.2682	-0.10487
6.38	14.7668	-0.03636
6.424	14.3757	0
6.468	13.964	-0.0396
6.512	13.2916	0
6.556	12.9983	-0.13757
6.6	12.6082	0.04332
6.644	12.0793	-0.03687
6.688	11.7498	-0.09467
6.732	11.3039	0.02116
6.776	10.9146	0.0293
6.82	10.5411	0.01434
6.864	10.0156	-0.01307
6.908	9.78738	0.01015
6.952	9.36841	-0.0479
6.996	9.05235	-0.01093
7.04	8.89616	-0.01266
7.084	8.42742	-0.1165
7.128	8.1788	-0.02094
7.172	7.86829	0.00844
7.216	7.59962	0
7.26	7.26345	-0.01399
7.304	7.13817	-0.0804
7.348	6.67624	-0.03053
7.392	6.49189	0.00922
7.436	6.33657	0.04255
7.48	6.16866	0.02913
7.524	5.89535	0.06433
7.568	5.77121	0.07216
7.612	5.52766	0.04412
7.656	5.2063	-0.05096
7.7	5.09875	0.03636
7.744	4.94222	0.03226
7.788	4.75992	0.05128
7.832	4.49304	0.05797
7.876	4.49687	0.02256
7.92	4.39252	0.0566
7.964	4.22666	-0.06218
8.008	4.03241	-0.02871
8.052	3.869	0.05405
8.096	3.69095	0.02098
8.14	3.61591	0.02439
8.184	3.48518	-0.10656
8.228	3.53951	0.00749
8.272	3.28003	0.06504
8.316	3.3101	-0.03846
8.36	3.14883	-0.04096
8.404	3.06127	0.00612
8.448	2.9214	-0.00791
8.492	2.73635	0.04467
8.536	2.6776	-0.0223
8.58	2.78191	-0.03774
8.624	2.58371	0.06015
8.668	2.55881	-0.01124
8.712	2.50512	0
8.756	2.38336	0.07407
8.8	2.30085	0.06504
8.844	2.3306	0
8.888	2.21734	-0.01124
8.932	2.06947	0.02778
8.976	1.9807	0.0274
9.02	1.96069	-0.03774
9.064	1.98545	0.0625
9.108	1.90389	0.0056
9.152	1.76365	-0.02564
9.196	1.75774	0.08163
9.24	1.78459	0.0604
9.284	1.69024	0.01786
9.328	1.59671	-0.01375
9.372	1.50125	0.0274
9.416	1.30966	-0.04255
9.46	1.36098	0.05512
9.504	1.46677	0.02632
9.548	1.50645	0.0118
9.592	1.24338	0.00662
9.636	1.29354	0.06557
9.68	1.45613	0.01487
9.724	1.32052	-0.03113
9.768	1.25535	0.10526
9.812	1.09218	0.05063
9.856	1.06809	-0.01695
9.9	1.257	0.07008
9.944	1.04007	0.0099
9.988	1.12973	0.06433
10.032	1.05942	0.07787
10.076	1.06265	0.02204
10.12	1.12756	-0.02459
10.164	0.81275	0.02098
10.208	0.84758	0.37063
10.252	0.9959	0.8688
10.296	0.80203	0.5122
10.34	0.82046	0.84765
10.384	0.71002	0.79695
10.428	0.91578	0.69231
10.472	0.89103	0.67416
10.516	0.6827	0.8538
10.56	0.78176	0.68672
10.604	0.84756	0.88432
10.648	0.78062	0.74157
10.692	0.56624	0.67822
10.736	0.53666	0.86111
10.78	0.61825	0.85623
10.824	0.65415	0.71074
10.868	0.67757	0.83425
10.912	0.51132	0.77723
10.956	0.72196	0.68182
11	0.56191	0.78261
11.044	0.43956	0.78079
11.088	0.54675	0.87671
11.132	0.39757	0.73029
11.176	0.39356	0.7185
11.22	0.5047	0.78548
11.264	0.35629	0.64865
11.308	0.43525	0.62366
11.352	0.30908	0.79109
11.396	0.43154	0.60957
11.44	0.33321	0.72906
11.484	0.41864	0.62687
11.528	0.36938	1.05338
11.572	0.40821	0.78378
11.616	0.38594	0.71744
11.66	0.23199	0.65473
11.704	0.41374	0.72973
11.748	0.19844	1.06667
11.792	0.32107	0.78006
11.836	0.34246	0.6712
11.88	0.18783	0.84594
11.924	0.23413	0.49301
11.968	0.22946	0.68493
12.012	0.23422	0.68912
12.056	0.08428	0.7191
12.1	0.2073	0.80826
12.144	0.20194	0.67337
12.188	-0.02595	0.70455
12.232	0.25073	0.89286
12.276	0.12518	0.72585
12.32	-0.05771	0.71292
12.364	0.13897	0.89028
12.408	0.21256	0.61369
12.452	0.26466	0.67662
12.496	0.16853	0.68835
12.54	0.13611	0.79401
12.584	0.2026	0.73016
12.628	0.24924	0.67991
12.672	0.09494	0.88055
12.716	0.19913	0.80315
12.76	0.14076	0.74328
12.804	0.32649	0.50317
12.848	-0.01514	0.69907
12.892	0.22925	0.8505
12.936	0.26564	0.58034
12.98	0.35545	0.71491
13.024	0.28054	0.78927
13.068	0.10849	0.66667
13.112	0.41777	0.6085
13.156	0.35674	0.69136
13.2	0.50826	0.93464
13.244	0.39136	0.71204
13.288	0.59652	0.7486
13.332	0.29871	0.72973
13.376	0.2212	0.63612
13.42	0.40619	0.66307
13.464	0.4498	0.66844
13.508	0.44696	0.59799
13.552	0.56666	0.63636
13.596	0.50306	0.81297
13.64	0.62875	0.59075
13.684	0.39392	0.68085
13.728	0.50203	0.57766
13.772	0.52268	0.71503
13.816	0.62384	0.60106
13.86	0.59504	0.77273
13.904	0.61185	0.75703
13.948	0.52471	0.67456
13.992	0.82467	0.60993
14.036	0.75322	0.71976
14.08	0.69756	0.66276
14.124	0.90801	0.50928
14.168	0.82108	0.64646
14.212	0.6834	0.73389
14.256	0.89204	0.83636
14.3	1.01173	0.65241
14.344	0.89175	0.64623
14.388	0.80603	0.71264
14.432	0.99316	0.7043
14.476	1.16225	0.84241
14.52	1.19455	0.7191
14.564	1.08299	0.80769
14.608	0.9611	0.74777
14.652	0.9632	0.67662
14.696	1.10445	0.71572
14.74	0.91956	0.59948
14.784	1.15539	0.74474
14.828	1.14212	0.67049
14.872	1.23503	0.80337
14.916	1.30297	0.78916
14.96	1.44468	0.79245
15.004	1.36371	0.66844
15.048	1.30223	0.84615
15.092	1.46606	0.69298
15.136	1.36968	0.70779
15.18	1.54314	0.71204
15.224	1.5373	0.73684
15.268	1.45048	0.6789
15.312	1.68221	0.74432
15.356	1.7189	0.675
15.4	1.63025	0.8265
15.444	1.82078	0.66431
15.488	1.9091	0.7076
15.532	1.91857	0.71299
15.576	1.87782	0.6988
15.62	2.18421	0.70414
15.664	2.04671	0.64646
15.708	1.98191	0.66049
15.752	2.24113	0.66501
15.796	2.13776	0.70199
15.84	2.45389	0.60808
15.884	2.2372	0.72313
15.928	2.37637	0.5288
15.972	2.43521	0.57516
16.016	2.57696	0.7541
16.06	2.66794	0.68085
16.104	2.79653	0.65181
16.148	2.81845	0.61111
16.192	2.82293	0.68354
16.236	3.0538	0.5679
16.28	3.23855	0.63918
16.324	3.14342	0.46686
16.368	3.31233	0.60843
16.412	3.21377	0.66899
16.456	3.47869	0.5283
16.5	3.79358	0.75806
16.544	3.74582	0.33915
16.588	3.75764	0.44751
16.632	4.07559	0.65587
16.676	4.17073	0.39863
16.72	4.29803	0.24324
16.764	4.35597	0.54545
16.808	4.58365	0.56044
16.852	4.70322	0.64481
16.896	4.76677	0.3949
16.94	4.9922	0.42105
16.984	5.10609	0.2437
17.028	5.4629	0.41696
17.072	5.57778	0.4
17.116	5.75186	0.29936
17.16	6.02547	0.10334
17.204	6.28477	0.06977
17.248	6.43826	0.0303
17.292	6.74929	0.07104
17.336	6.88476	-0.01307
17.38	7.21228	0.03409
17.424	7.38938	0.04959
17.468	7.84604	0.52756
17.512	8.02281	0.12955
17.556	8.35332	0.2
17.6	8.64895	0.13223
17.644	8.84866	0
17.688	9.29828	-0.06322
17.732	9.4417	-0.06695
17.776	9.93203	0.0724
17.82	10.3665	-0.01942
17.864	10.7249	0.0176
17.908	11.0892	0.27386
17.952	11.527	0.20213
17.996	11.9545	0.29878
18.04	12.3828	0.22053
18.084	12.8396	0.33628
18.128	13.2573	0.10646
18.172	13.637	-0.02804
18.216	14.1409	0.02817
18.26	14.5648	-0.04
18.304	15.2389	0.0274
18.348	15.6984	0.0724
18.392	15.4668	-0.0793
18.436	16.1749	-0.06383
18.48	16.5681	0.0824
18.524	16.8443	-0.04278
18.568	16.3585	-0.03774
18.612	15.8256	-0.00543
18.656	15.3806	0.01024
18.7	14.7004	0.01937
18.744	14.3649	0.05063
18.788	13.8878	0
18.832	13.4369	0.02817
18.876	12.8609	0.02597
18.92	12.2995	-0.00683
18.964	12.0018	0.02262
19.008	11.6395	0.03716
19.052	10.9607	-0.03825
19.096	10.8538	0.01376
19.14	10.3649	0.02655
19.184	10.0291	0.02439
19.228	9.54224	-0.0181
19.272	9.41327	0.03266
19.316	8.90953	0.02985
19.36	8.6433	0.0533
19.404	8.31498	0.03528
19.448	8.11194	0.02821
19.492	7.80188	0.02027
19.536	7.47962	0.02198
19.58	7.37092	0.01848
19.624	7.13722	0.07216
19.668	6.77832	-0.00907
19.712	6.4919	0.02802
19.756	6.26173	-0.02041
19.8	6.18708	-0.47059
19.844	5.77436	-0.27451
19.888	5.55498	0.03941
19.932	5.42154	0.01852
19.976	5.38606	0.0309
20.02	5.13197	0.04138
20.064	5.04948	0.02235
20.108	4.54277	0.03571
20.152	4.61123	0.01053
20.196	4.495	0.0349
20.24	4.27728	0.0415
20.284	4.10836	0.03178
20.328	4.03846	0.0264
20.372	3.9355	0.05217
20.416	3.70472	0.04969
20.46	3.54758	0.00552
20.504	3.51957	-0.01375
20.548	3.22882	-0.02871
20.592	3.30249	-0.0076
20.636	3.12078	0.039
20.68	3.20777	0.04872
20.724	2.96637	0.04494
20.768	3.01397	-0.00496
20.812	2.7611	0.01796
20.856	2.70263	0.09091
20.9	2.70863	0.06838
20.944	2.65391	0.01035
20.988	2.43769	-0.01132
21.032	2.46049	0.02157
21.076	2.32398	0.05298
21.12	2.29725	0.03046
21.164	2.15608	0.04376
21.208	2.02502	0.01323
21.252	2.06939	0.01342
21.296	2.1405	0.03983
21.34	1.94812	0.05303
21.384	1.93989	0.02321
21.428	1.76017	0.02228
21.472	1.73839	0.01786
21.516	1.86643	0.03415
21.56	1.71824	0.04167
21.604	1.80915	0.03226
21.648	1.60842	0.01776
21.692	1.49618	0.03846
21.736	1.49255	0.02256
21.78	1.43044	0.07363
21.824	1.489	0.03452
21.868	1.4139	0.02523
21.912	1.23823	0.04908
21.956	1.35096	0.0327
22	1.32285	0.0276
22.044	1.23533	0.04995
22.088	1.14561	0.0266
22.132	1.11984	0.02339
22.176	1.17306	0.03796
22.22	1.19931	0.71033
22.264	1.01175	0.56853
22.308	1.10175	0.73262
22.352	0.99142	0.73239
22.396	0.90034	0.75827
22.44	1.00361	0.64286
22.484	0.81687	0.94949
22.528	0.99422	0.79769
22.572	1.06689	0.88959
22.616	0.90699	0.86784
22.66	0.87318	0.79452
22.704	0.99813	0.73318
22.748	0.94136	0.60317
22.792	0.70601	0.74619
22.836	0.77116	0.72067
22.88	0.64813	0.73815
22.924	0.84404	0.7851
22.968	0.62	0.7027
23.012	0.6709	0.68384
23.056	0.63855	0.69136
23.1	0.64533	0.70183
23.144	0.57922	0.66814
23.188	0.6314	0.80211
23.232	0.58041	0.69626
23.276	0.64245	0.55172
23.32	0.55848	0.84241
23.364	0.56052	0.65812
23.408	0.45059	0.73088
23.452	0.39389	0.71033
23.496	0.51582	0.81375
23.54	0.44975	0.89614
23.584	0.37384	0.73282
23.628	0.46041	0.71299
23.672	0.46609	0.61369
23.716	0.1543	0.78142
23.76	0.25531	0.89071
23.804	0.4739	0.7541
23.848	0.36562	0.78166
23.892	0.36495	0.74286
23.936	0.18324	0.5509
23.98	0.16184	0.82599
24.024	0.13787	0.67078
24.068	0.38256	0.69163
24.112	0.33285	0.72689
24.156	0.15951	0.73684
24.2	0.23118	0.82927
24.244	0.15278	0.66395
24.288	0.25301	0.80978
24.332	0.27399	0.76526
24.376	0.25063	0.75703
24.42	0.15686	0.69697
24.464	0.09159	0.40678
24.508	0.25599	1.01706
24.552	0.11597	0.85366
24.596	0.09581	0.60137
24.64	0.10581	0.82759
24.684	0.19368	0.67442
24.728	0.21852	0.72973
24.772	0.29081	0.7432
24.816	0.09592	0.66667
24.86	0.24429	0.69388
24.904	0.06757	0.6875
24.948	0.2534	0.78161
24.992	0.36162	0.73333
25.036	0.29022	0.74747
25.08	0.13669	0.76684
25.124	0.29586	0.76071
25.168	0.22288	0.74468
25.212	0.32997	0.84177
25.256	0.291	0.82574
25.3	0.28159	0.79167
25.344	0.31655	0.59658
25.388	0.24959	0.67213
25.432	0.2798	0.61722
25.476	0.34559	0.79452
25.52	0.38455	0.73822
25.564	0.40408	0.74255
25.608	0.49666	0.6748
25.652	0.38341	0.63964
25.696	0.27686	0.71014
25.74	0.1664	0.73563
25.784	0.25224	0.8318
25.828	0.44264	0.74359
25.872	0.45119	0.58613
25.916	0.4941	0.69027
25.96	0.52066	0.61165
26.004	0.56365	0.8
26.048	0.38855	0.63007
26.092	0.57644	0.64208
26.136	0.52672	0.66245
26.18	0.62378	0.58629
26.224	0.79636	0.6978
26.268	0.72887	-0.08696
26.312	0.6764	0.0625
26.356	0.5386	-4
26.4	0.56888	0.13793
26.444	0.63829	-0.15385
26.488	0.76509	0.16667
26.532	0.78604	-0.25
26.576	0.84591	-0.17021
26.62	0.84024	0.24242
26.664	0.70027	0
26.708	0.96215	1
26.752	0.8007	2.66667
26.796	0.98046	0.61538
26.84	0.99983	0.08696
26.884	1.07995	0
26.928	0.8445	-0.25
26.972	1.04285	0.61538
27.016	0.85668	0.16667
27.06	0.98882	-0.04651
27.104	1.20358	-0.4
27.148	1.17325	1
27.192	1.27225	0.64286
27.236	1.39928	0.5
27.28	1.16441	-1
27.324	1.39264	--
27.368	1.43288	-4
27.412	1.57479	0.44444
27.456	1.48934	0.2029
27.5	1.52987	0.13793
27.544	1.43317	0.2
27.588	1.48285	0
27.632	1.44609	0
27.676	1.56827	0.13333
27.72	1.65114	1
27.764	1.7385	-0.30435
27.808	1.79288	-0.66667
27.852	1.66058	1
27.896	1.87958	0.44444
27.94	1.8268	0.1573
27.984	2.16403	0.63415
28.028	2.16795	0.31818
28.072	2.23745	1
28.116	2.10585	1
28.16	2.26959	2.36364
28.204	2.28315	-0.15385
28.248	2.38905	0
28.292	2.58905	1
28.336	2.66103	0.47368
28.38	2.42959	-4
28.424	2.66493	0.375
28.468	2.86298	0.04255
28.512	2.82808	0.25926
28.556	2.91514	0.28571
28.6	2.88559	0.48276
28.644	3.10134	0.16667
28.688	3.29786	0.25
28.732	3.4072	0.28571
28.776	3.43281	2.66667
28.82	3.55153	-0.19048
28.864	3.72662	-0.25
28.908	3.73014	-0.81818
28.952	4.00758	0.18182
28.996	3.98252	0.25532
29.04	4.12518	-1
29.084	4.36542	-0.03175
29.128	4.41591	0.07895
29.172	4.70751	0.19355
29.216	4.73246	0.4
29.26	5.02458	0.73684
29.304	5.16208	-0.66667
29.348	5.31994	0.64286
29.392	5.42056	0.44444
29.436	5.77947	0.36364
29.48	5.89635	0.125
29.524	6.20844	1.45455
29.568	6.44894	0.2029
29.612	6.68719	0.27083
29.656	6.84755	0.44444
29.7	7.19921	0.61538
29.744	7.44007	-0.11111
29.788	7.60061	0
29.832	8.05003	0.26829
29.876	8.2562	-4
29.92	8.5865	0.18605
29.964	8.90923	-0.15385
30.008	9.28131	0.66667
30.052	9.63008	0.01575
30.096	9.96685	0.7619
30.14	10.3317	0.46809
30.184	10.6384	0.44444
30.228	10.9725	0.11765
30.272	11.4018	0.41176
30.316	11.7976	-0.02273
30.36	12.3687	0.13043
30.404	12.7845	-0.66667
30.448	13.2925	0.19753
30.492	13.7663	0.28571
30.536	14.323	-4
30.58	14.7446	0.35484
30.624	15.1279	0
30.668	15.6511	-0.0241
30.712	16.183	0.16667
30.756	16.1439	-0.31579
30.8	16.6373	0.21053
30.844	16.5687	0.11765
30.888	16.2928	0.42308
30.932	15.8174	-2.18182
30.976	15.2529	1
31.02	14.8328	-0.81818
31.064	14.3417	0.61538
31.108	13.7765	0.46154
31.152	13.3696	0.5283
31.196	12.9505	0.63415
31.24	12.4651	0.63415
31.284	12.1418	0.375
31.328	11.6165	0.11765
31.372	11.2004	0.8
31.416	10.8301	-0.66667
31.46	10.4856	0.47368
31.504	10.1521	0.32836
31.548	9.78971	4
31.592	9.31785	-0.34146
31.636	9.10828	0.14141
31.68	8.68815	0.23077
31.724	8.37914	0.09091
31.768	8.01699	0.1
31.812	7.77512	-0.15385
31.856	7.5114	0.33962
31.9	7.24726	0.57143
31.944	6.97111	-0.03774
31.988	6.78505	0.64286
32.032	6.49759	0
32.076	6.25991	-0.47059
32.12	6.06801	0.33962
32.164	5.85666	-0.15385
32.208	5.55967	0.31579
32.252	5.47616	0.31818
32.296	5.14395	0.28571
32.34	5.04206	-0.4
32.384	4.95339	-1.5
32.428	4.70836	0.48276
32.472	4.73833	-0.25
32.516	4.51743	0.54545
32.56	4.27576	0.39394
32.604	4.15129	-4
32.648	4.07103	0.28571
32.692	3.95482	0.28571
32.736	3.73938	-0.25
32.78	3.54969	0.31818
32.824	3.57828	0.44444
32.868	3.35536	0.16667
32.912	3.16834	0.4
32.956	3.21273	0.23077
33	3.20043	0.21053
33.044	2.96305	0.0678
33.088	2.78157	0.09836
33.132	2.85357	-1.27273
33.176	2.70597	0.38356
33.22	2.57743	1.29412
33.264	2.56625	1.71429
33.308	2.63945	0.13223
33.352	2.28687	1
33.396	2.3867	-0.2069
33.44	2.24531	1
33.484	2.26652	-0.07143
33.528	2.00347	0.33962
33.572	1.97396	1.45455
33.616	2.01551	0.65116
33.66	1.85542	1.38462
33.704	1.81252	-0.06061
33.748	1.92954	-0.06061
33.792	1.7591	--
33.836	1.61492	-0.26506
33.88	1.5916	0.24242
33.924	1.60026	0.2
33.968	1.63213	-0.06557
34.012	1.58947	-0.15385
34.056	1.41726	0.07407
34.1	1.41661	-0.07843
34.144	1.31152	0.26471
34.188	1.58123	0.8
34.232	1.1925	-0.15385
34.276	1.47517	-0.4
34.32	1.36394	0.47368
34.364	1.29306	-0.04651
34.408	1.16793	0.41176
34.452	1.14766	0.44444
34.496	1.1549	-0.17647
34.54	1.10427	1.71429
34.584	0.99908	0.0625
34.628	1.01323	0.51613
34.672	0.99175	0.16667
34.716	1.07678	0
34.76	1.00039	2.66667
34.804	0.92471	-0.2963
34.848	0.87251	0.19643
34.892	0.96531	0.39024
34.936	0.8652	0.30108
34.98	0.73683	1
35.024	0.90677	1.38462
35.068	0.69995	16
35.112	0.68859	0.24658
35.156	0.69419	--
35.2	0.72796	0
35.244	0.72171	-0.66667
35.288	0.59158	0.6875
35.332	0.62684	-0.07143
35.376	0.54717	0.375
35.42	0.57268	0.5
35.464	0.52089	0.01869
35.508	0.51734	-0.25
35.552	0.46129	-0.15385
35.596	0.54157	-0.06061
35.64	0.50616	-0.42857
35.684	0.37573	0
35.728	0.48557	0.75
35.772	0.36681	0.29487
35.816	0.46132	2.66667
35.86	0.45023	-0.05263
35.904	0.39713	0.11765
35.948	0.43968	11
35.992	0.42932	-1.07317
36.036	0.43889	0.33333
36.08	0.28493	0.44444
36.124	0.28645	0.34783
36.168	0.43461	0.8
36.212	0.29019	-0.10169
36.256	0.22117	0.28571
36.3	0.38259	-0.04167
36.344	0.34407	-0.10169
36.388	0.1543	-4
36.432	0.25011	0.33333
36.476	0.21748	-14
36.52	0.27462	0.28571
36.564	0.13534	0.26573
36.608	0.35305	0.78261
36.652	0.05051	-4
36.696	0.2413	0.03846
36.74	0.09627	-1.77778
36.784	0.0688	-1.5
36.828	0.09883	0.44444
36.872	0.11009	0.44444
36.916	0.11539	0.72222
36.96	0.02472	-0.66667

## Sheet: Figure 1C
time (s)	force (pN)	FRET efficiency
0.044	0.6436	0.93708
0.088	0.65654	0.97165
0.132	0.55162	0.69103
0.176	0.60327	0.82621
0.22	0.59129	0.96316
0.264	0.64815	0.91076
0.308	0.64276	0.97879
0.352	0.72872	0.86916
0.396	0.67198	0.71339
0.44	0.63693	0.83383
0.484	0.68981	0.83794
0.528	0.79416	0.7982
0.572	0.74121	0.69004
0.616	0.73442	0.84444
0.66	0.83805	0.65
0.704	0.83613	0.84
0.748	0.86362	0.76907
0.792	0.8481	0.81739
0.836	0.96566	0.76569
0.88	0.77544	0.89892
0.924	0.86084	0.77035
0.968	0.86293	0.87463
1.012	0.77741	0.75586
1.056	0.91553	0.86
1.1	0.99869	0.8733
1.144	0.93361	1.01892
1.188	0.97001	0.93869
1.232	0.97389	0.92533
1.276	1.00101	0.87624
1.32	1.00202	0.80763
1.364	1.06196	0.87624
1.408	0.9809	1
1.452	1.0053	0.78934
1.496	1.00015	0.92533
1.54	1.0778	0.67729
1.584	1.12783	0.83421
1.628	1.10993	1
1.672	1.23716	0.66121
1.716	1.15191	0.70526
1.76	1.22801	0.90378
1.804	1.19006	0.7485
1.848	1.28668	0.94021
1.892	1.1596	0.80763
1.936	1.33892	0.8
1.98	1.31852	0.95836
2.024	1.36351	0.664
2.068	1.28445	0.8963
2.112	1.45894	1
2.156	1.52643	0.863
2.2	1.42165	0.91318
2.244	1.56953	0.93708
2.288	1.64718	0.90261
2.332	1.53134	0.76516
2.376	1.74869	0.75111
2.42	1.69041	0.7617
2.464	1.88525	0.62458
2.508	1.63312	0.68706
2.552	1.69476	0.72683
2.596	1.88977	0.80382
2.64	1.90615	1.05068
2.684	1.91554	0.76755
2.728	1.84342	0.91765
2.772	2.02108	0.66691
2.816	2.0383	0.8303
2.86	1.93625	0.64598
2.904	2.16428	0.7346
2.948	1.97597	0.79562
2.992	2.21845	0.79562
3.036	2.2134	0.61709
3.08	2.29832	0.66646
3.124	2.27944	0.79026
3.168	2.53301	0.6093
3.212	2.40149	0.77711
3.256	2.54252	0.75862
3.3	2.70322	0.81564
3.344	2.69099	0.56923
3.388	2.66834	0.71685
3.432	2.82564	0.86
3.476	2.87646	0.58519
3.52	3.09533	0.3
3.564	3.045	0.65
3.608	3.16711	0.54975
3.652	3.15091	0.5177
3.696	3.27429	0.53333
3.74	3.51347	0.44
3.784	3.66862	0.54798
3.828	3.61406	0.59615
3.872	3.70008	0.46201
3.916	3.7593	0.53333
3.96	3.81098	0.468
4.004	3.8639	0.37778
4.048	4.1295	0.55497
4.092	4.23753	0.48065
4.136	4.31042	0.54723
4.18	4.47392	0.84658
4.224	4.63451	0.46074
4.268	4.69626	0.552
4.312	4.79796	0.56923
4.356	5.09116	0.56174
4.4	4.98188	0.61246
4.444	5.27832	0.615
4.488	5.48362	0.57468
4.532	5.5223	0.57468
4.576	5.93067	0.59273
4.62	6.00092	0.72757
4.664	6.05956	0.69593
4.708	6.22237	0.59739
4.752	6.50542	0.30959
4.796	6.64419	0.69399
4.84	6.87864	0.69505
4.884	7.09832	0.63114
4.928	7.3922	0.23636
4.972	7.52027	0.493
5.016	7.72224	0.30959
5.06	8.01964	0.4293
5.104	8.15463	0.26557
5.148	8.4678	0.20367
5.192	8.83049	0.92533
5.236	8.96156	0.97627
5.28	9.31467	0.68755
5.324	9.48473	0.56505
5.368	9.97574	0.24185
5.412	10.1329	0.45366
5.456	10.4174	0.2705
5.5	10.7718	0.36
5.544	11.1629	0.21463
5.588	11.4708	0.47437
5.632	11.6723	0.33285
5.676	11.966	0.51141
5.72	12.4957	-0.12
5.764	12.8261	0.00994
5.808	13.2106	0.10725
5.852	13.7592	0.53333
5.896	14.2166	0.75111
5.94	14.644	0.69667
5.984	15.0189	0.55789
6.028	15.3689	1
6.072	15.879	0.53333
6.116	16.2033	0.45686
6.16	16.9327	0.67059
6.204	17.4369	0.62458
6.248	17.9278	0.49895
6.292	18.0023	-0.00919
6.336	18.4581	0.23024
6.38	18.8963	0.09606
6.424	19.6895	0.06355
6.468	20.3045	-0.25917
6.512	20.9905	-0.15294
6.556	21.6838	0.05043
6.6	22.4721	0.01176
6.644	22.8846	0.06667
6.688	23.2607	0.04
6.732	23.0896	0.07438
6.776	22.3093	0.16091
6.82	21.5316	0.11144
6.864	20.8205	-0.02629
6.908	20.0125	0.02674
6.952	19.6267	0.25039
6.996	18.6562	0.15349
7.04	18.0557	0.125
7.084	17.5069	0.14025
7.128	16.8517	-0.05574
7.172	16.463	0.14902
7.216	16.0065	-0.0324
7.26	15.4818	-0.01111
7.304	15.1055	0.02063
7.348	14.6305	0.06667
7.392	14.0269	-0.07305
7.436	13.9021	0.17037
7.48	13.3414	0.08876
7.524	13.0907	-0.12
7.568	12.6897	-0.09404
7.612	12.2386	0.04431
7.656	11.8866	0.11965
7.7	11.5837	0.17037
7.744	11.2124	0.09189
7.788	10.7188	0.06127
7.832	10.5764	-0.02439
7.876	10.2229	0.12123
7.92	10.039	-0.0638
7.964	9.62659	0.03576
8.008	9.3478	-0.02989
8.052	9.0523	0.2
8.096	8.83025	0.08029
8.14	8.59713	0.28205
8.184	8.27058	-0.00513
8.228	7.98415	0.06667
8.272	7.86127	-0.06346
8.316	7.50373	0.18659
8.36	7.43475	0.09677
8.404	7.27058	0.10284
8.448	6.88972	0.15472
8.492	6.5833	0.18745
8.536	6.59169	0.13705
8.58	6.36776	-0.1596
8.624	6.155	0.2565
8.668	6.02625	0.17037
8.712	5.97949	0.30543
8.756	5.73729	0.01288
8.8	5.49754	0.09189
8.844	5.19702	0.02385
8.888	5.07358	-0.03116
8.932	5.06233	0.01364
8.976	4.91102	0.07989
9.02	4.70385	0.14957
9.064	4.53419	0.1
9.108	4.66432	0.07709
9.152	4.45399	0.09189
9.196	4.23017	0.02839
9.24	4.15026	0.13705
9.284	4.04152	-0.14981
9.328	3.96606	0.11823
9.372	3.69799	0.05478
9.416	3.72079	0.125
9.46	3.60544	0.0699
9.504	3.42194	0.03077
9.548	3.32807	0.12889
9.592	3.24548	0.04
9.636	3.14786	0.23215
9.68	3.11629	0.08103
9.724	2.89388	-0.01818
9.768	2.86999	0.125
9.812	2.97754	0.02063
9.856	2.88216	0.10725
9.9	2.84852	0.00444
9.944	2.80178	0.13846
9.988	2.75486	0.20473
10.032	2.51388	0.03077
10.076	2.5868	0.06667
10.12	2.46154	0.01517
10.164	2.33519	0.05043
10.208	2.23935	0.23636
10.252	2.11684	0.14576
10.296	2.28473	-0.12
10.34	2.18397	-0.06479
10.384	2.13359	0.25532
10.428	1.9281	0.14576
10.472	2.0292	0.03077
10.516	1.79693	0.125
10.56	1.77227	0.20367
10.604	1.88707	0.09845
10.648	1.88571	-0.00513
10.692	1.68115	0.16629
10.736	1.74564	-0.00471
10.78	1.78221	0.12082
10.824	1.61376	0.12988
10.868	1.52973	-0.000760456
10.912	1.59052	0.05869
10.956	1.67899	0.05618
11	1.3999	0.05043
11.044	1.32859	0.03448
11.088	1.34008	0.17725
11.132	1.49435	0.03953
11.176	1.39745	0.17037
11.22	1.44213	0.19641
11.264	1.24473	0.08276
11.308	1.48287	-0.09834
11.352	1.24778	0.11758
11.396	1.26275	0.22336
11.44	1.24543	0.14576
11.484	1.26013	0.22087
11.528	1.16754	0.0767
11.572	1.14855	0.03576
11.616	1.08664	-0.06842
11.66	1.04118	0.02519
11.704	1.10138	0.10189
11.748	1.20383	-0.02989
11.792	1.08623	0.02723
11.836	1.24132	0.02063
11.88	0.98631	0.4925
11.924	1.03146	0.94021
11.968	1.07453	1.04498
12.012	0.95433	0.80382
12.056	0.89267	0.78462
12.1	0.85834	1
12.144	0.99511	0.73527
12.188	0.9912	0.94058
12.232	1.13542	0.92415
12.276	0.70036	0.7982
12.32	0.79952	0.92533
12.364	0.83873	0.89459
12.408	0.84915	0.89231
12.452	0.82593	0.98482
12.496	0.79297	1
12.54	0.76817	0.85434
12.584	0.69295	1.04043
12.628	0.74412	0.78462
12.672	0.76659	0.93171
12.716	0.69448	0.9817
12.76	0.85764	0.91223
12.804	0.57108	1.01892
12.848	0.73027	1.06137
12.892	0.67155	0.8303
12.936	0.76019	0.71282
12.98	0.62112	0.82568
13.024	0.61157	0.71282
13.068	0.6508	0.61709
13.112	0.61173	0.79467
13.156	0.6623	0.9825
13.2	0.68236	0.9267
13.244	0.69538	0.98391
13.288	0.61345	0.77353
13.332	0.70693	0.90455
13.376	0.62572	1
13.42	0.61173	0.98637
13.464	0.73986	0.94167
13.508	0.75326	0.98127
13.552	0.74104	0.91765
13.596	0.6954	0.83794
13.64	0.61279	0.88911
13.684	0.65472	0.92294
13.728	0.8424	1.04148
13.772	0.6694	0.84281
13.816	0.79836	0.9336
13.86	0.80251	0.92866
13.904	0.62274	0.94563
13.948	0.7356	1
13.992	0.73937	0.78868
14.036	0.73539	0.9817
14.08	0.86379	0.98323
14.124	0.82132	0.87126
14.168	0.81882	0.60529
14.212	0.91992	0.76338
14.256	0.85585	0.5177
14.3	0.89081	0.40267
14.344	0.97586	0.71152
14.388	0.9651	0.71685
14.432	0.80795	0.9082
14.476	1.06326	0.91026
14.52	1.03973	0.91318
14.564	0.9392	0.80071
14.608	1.01671	0.91971
14.652	1.02229	0.75111
14.696	0.88817	0.95214
14.74	1.13619	0.89354
14.784	1.0151	0.85263
14.828	1.3016	0.87826
14.872	1.32567	0.73333
14.916	1.0867	0.79935
14.96	1.28153	0.84865
15.004	1.13598	0.73598
15.048	1.19455	0.72549
15.092	1.33356	0.62667
15.136	1.34073	0.96948
15.18	1.30632	0.83383
15.224	1.20817	0.84492
15.268	1.38329	0.82568
15.312	1.25836	1
15.356	1.42413	0.84046
15.4	1.36786	0.96138
15.444	1.36868	1
15.488	1.4787	0.73263
15.532	1.56467	0.5177
15.576	1.59885	0.93022
15.62	1.59026	1
15.664	1.56044	0.95353
15.708	1.64165	0.92866
15.752	1.75327	1
15.796	1.80202	0.89795
15.84	1.62257	0.97352
15.884	1.83226	0.85133
15.928	1.89017	0.72549
15.972	1.83123	0.81017
16.016	2.10132	0.83529
16.06	2.01241	0.90175
16.104	2.01544	0.90261
16.148	2.00544	0.79562
16.192	2.11434	0.79387
16.236	2.17796	0.89434
16.28	2.25694	1
16.324	2.2267	0.96763
16.368	2.3958	0.7485
16.412	2.43928	0.89818
16.456	2.37074	0.48115
16.5	2.44343	0.80437
16.544	2.55766	0.4326
16.588	2.4817	0.52062
16.632	2.62207	0.68889
16.676	2.78149	0.88085
16.72	2.88747	1
16.764	2.87327	0.9011
16.808	3.00315	0.75974
16.852	3.02599	0.66646
16.896	3.1195	0.54223
16.94	3.23884	0.80235
16.984	3.3266	0.87273
17.028	3.39553	0.81457
17.072	3.48762	0.83885
17.116	3.61188	0.88085
17.16	3.59929	0.53333
17.204	3.72036	0.3941
17.248	3.88013	0.75652
17.292	3.97916	0.47437
17.336	4.18573	0.81333
17.38	4.15161	0.34118
17.424	4.23542	0.20667
17.468	4.35368	0.16452
17.512	4.54548	-0.07305
17.556	4.61563	0.17962
17.6	4.71917	0.15349
17.644	4.87182	0.01364
17.688	5.12095	0.17037
17.732	5.16485	0.09189
17.776	5.25329	0.34118
17.82	5.37483	0.20473
17.864	5.69214	0.15152
17.908	5.83404	0.25333
17.952	5.99461	0.20473
17.996	6.17364	0.39531
18.04	6.36332	0.24678
18.084	6.58479	0.17826
18.128	6.64902	-0.01477
18.172	7.00969	0.18447
18.216	7.15438	0.02
18.26	7.27838	-0.18125
18.304	7.46162	0.40074
18.348	7.76074	0.05137
18.392	8.12942	-0.01593
18.436	8.35734	0.04681
18.48	8.5529	-0.07807
18.524	8.75874	0.21463
18.568	8.96597	0.20961
18.612	9.32602	0.25935
18.656	9.52128	0.05954
18.7	9.70428	0.0439
18.744	9.99314	-0.06574
18.788	10.3828	0.02792
18.832	10.9244	-0.02241
18.876	11.1543	0.25039
18.92	11.4874	0.20916
18.964	11.8745	-0.01111
19.008	12.1056	0.13846
19.052	12.5154	0.05422
19.096	12.7974	0.08876
19.14	13.1296	0.11287
19.184	13.5984	0.05043
19.228	13.9393	0.18333
19.272	14.459	-0.05439
19.316	14.9533	0.21307
19.36	15.1447	0.07122
19.404	15.7359	0.22588
19.448	16.1049	-0.09487
19.492	16.8106	0.13381
19.536	17.5255	0.11823
19.58	17.9946	0.11403
19.624	18.4717	0.14206
19.668	19.0209	-0.03361
19.712	19.7562	0.18525
19.756	20.3445	0.0326
19.8	20.8815	0.14576
19.844	21.8606	0.09189
19.888	22.3186	0.09677
19.932	23.0434	0.03641
19.976	23.566	0.06053
20.02	23.0083	0.22804
20.064	22.0253	0.14206
20.108	21.3402	0.08029
20.152	20.6382	0.04681
20.196	19.9072	0.15752
20.24	19.3825	0.13216
20.284	18.7471	0.11287
20.328	18.1218	0.18333
20.372	17.6159	0.06667
20.416	17.0943	0.06949
20.46	16.502	0.00395
20.504	15.9268	0.31707
20.548	15.5763	0.13059
20.592	15.075	0.15537
20.636	14.835	0.09512
20.68	14.2869	0.08722
20.724	13.9304	0.11823
20.768	13.2788	0.11678
20.812	13.1016	0.12823
20.856	12.7382	-0.0876
20.9	12.2193	0.03077
20.944	11.898	0.13155
20.988	11.7244	0.08276
21.032	11.2304	0.18283
21.076	10.9828	0.10962
21.12	10.5147	-0.08889
21.164	10.201	0.22087
21.208	9.84737	-0.0363
21.252	9.6269	0.02898
21.296	9.44969	0.05869
21.34	9.2022	0.01176
21.384	8.78471	0.0411
21.428	8.53916	0.01754
21.472	8.30846	0.17426
21.516	8.1146	0.07239
21.56	7.8986	0.06667
21.604	7.41431	0.15509
21.648	7.50281	-0.04054
21.692	7.19337	0.30959
21.736	6.97598	-0.15769
21.78	6.6098	0.22974
21.824	6.68975	-0.01357
21.868	6.34321	-0.07006
21.912	6.2091	0.11144
21.956	5.96224	0.02674
22	5.82327	0.06053
22.044	5.69275	0.17962
22.088	5.47725	-0.02629
22.132	5.32595	0.15641
22.176	5.2008	-0.08889
22.22	5.03668	0.02609
22.264	4.90158	0.01176
22.308	4.72852	0.00395
22.352	4.58617	0.06667
22.396	4.49037	0.05294
22.44	4.28377	0.02792
22.484	4.24319	0.05618
22.528	4.17767	0.13846
22.572	4.07902	0.07848
22.616	3.9277	0.22759
22.66	3.91466	-0.04314
22.704	3.7332	0.04938
22.748	3.72592	0.18049
22.792	3.48487	0.12988
22.836	3.38522	0.09189
22.88	3.26514	0.10875
22.924	3.19945	0.15349
22.968	3.21216	0.17037
23.012	3.01776	0.20253
23.056	3.01116	0.1032
23.1	2.90875	-0.08213
23.144	2.82076	0.0411
23.188	2.67712	0.05294
23.232	2.70835	0.00155
23.276	2.60902	-0.02439
23.32	2.49616	0.13381
23.364	2.44885	0.05043
23.408	2.50907	-0.1596
23.452	2.5022	0.09189
23.496	2.38351	0.05043
23.54	2.33282	0.01754
23.584	2.30746	0.0767
23.628	2.20857	0.08029
23.672	2.07179	0.16509
23.716	2.11142	0.01517
23.76	1.98858	-0.07917
23.804	2.02317	0.08276
23.848	2.01771	0.03373
23.892	1.81687	0.14576
23.936	2.01634	0.06053
23.98	1.83093	0.16509
24.024	1.70372	0.10189
24.068	1.73613	0.08681
24.112	1.65125	0.00905
24.156	1.6559	0.22432
24.2	1.59502	0.11758
24.244	1.45754	-0.02989
24.288	1.56057	0.0439
24.332	1.56056	0.12853
24.376	1.40665	0.1
24.42	1.36643	0.00852
24.464	1.41063	0.05761
24.508	1.38536	0.23636
24.552	1.3821	0.06667
24.596	1.43016	-0.24124
24.64	1.28822	0.13846
24.684	1.23361	0.03077
24.728	1.10714	0.05869
24.772	1.20646	0.05422
24.816	1.32769	0.08276
24.86	1.13305	-0.01981
24.904	1.16479	0.26847
24.948	1.04917	0.25783
24.992	1.14762	0.0767
25.036	1.19763	0.01288
25.08	1.08679	0.08276
25.124	0.97847	0.0993
25.168	0.95024	0.1004
25.212	1.03336	0.0411
25.256	0.9152	-0.00299
25.3	0.88765	0.16091
25.344	0.94574	0.17492
25.388	0.98838	0.18049
25.432	0.87791	-0.02241
25.476	0.98654	0.01754
25.52	0.84149	0.10189
25.564	0.8697	-0.06667
25.608	0.89407	0.10576
25.652	0.91268	0.04
25.696	0.85254	0.01958
25.74	0.8192	0.00155
25.784	0.94899	0.00155
25.828	0.7291	-0.0165
25.872	0.79774	0.15752
25.916	0.80171	0.09845
25.96	0.66804	-0.08468
26.004	0.70175	0.26557
26.048	0.63432	0.03838
26.092	0.76124	0.2
26.136	0.68922	0.09189
26.18	0.61556	0.00444
26.224	0.60667	0.04982
26.268	0.64053	0.09189
26.312	0.65837	-0.04186
26.356	0.7284	0.27289
26.4	0.7209	0.00477
26.444	0.59212	0.3941
26.488	0.76509	-0.07917
26.532	0.54127	0.18447
26.576	0.50072	0.34118
26.62	0.73429	0.37778
26.664	0.63697	0.2
26.708	0.49252	0.21463
26.752	0.64991	0.27482
26.796	0.52711	0.23636
26.84	0.54031	0.23636
26.884	0.79404	0.49663
26.928	0.74583	0.37
26.972	0.77124	0.58519
27.016	0.67395	0.3
27.06	0.7729	0.53333
27.104	0.73507	0.38581
27.148	0.80485	0.62162
27.192	0.73862	0.25333
27.236	0.68357	0.71824
27.28	0.78054	0.36723
27.324	0.79669	0.2
27.368	0.83059	0.56923
27.412	0.87337	0.49091
27.456	0.79617	0.22516
27.5	0.90466	0.62941
27.544	0.96343	0.29083
27.588	0.9159	0.37343
27.632	0.85108	0.60284
27.676	0.95196	-0.55556
27.72	0.89543	0.34118
27.764	0.83591	0.34118
27.808	0.89453	0.7982
27.852	0.84482	0.31556
27.896	1.13984	0.64755
27.94	1.13165	0.14576
27.984	1.1056	0.31556
28.028	1.07774	0.26557
28.072	1.11379	0.50442
28.116	1.31622	0.32482
28.16	1.12515	0.91318
28.204	1.23999	0.31556
28.248	1.12883	0.53333
28.292	1.26362	0.36495
28.336	1.13085	0.06667
28.38	1.25896	0.23636
28.424	1.25773	0.30959
28.468	1.35662	0.49091
28.512	1.38555	0.50949
28.556	1.44002	0.3
28.6	1.40565	0.31963
28.644	1.52696	0.49895
28.688	1.40835	0.3913
28.732	1.43774	0.45366
28.776	1.54774	0.60167
28.82	1.50556	0.65
28.864	1.63694	-0.03478
28.908	1.56319	0.3913
28.952	1.56583	0.07848
28.996	1.74139	0.55906
29.04	1.72804	0.35676
29.084	1.82545	0.40267
29.128	1.63085	0.55337
29.172	1.77084	0.25783
29.216	1.82865	0.125
29.26	2.10052	0.125
29.304	2.02301	0.37778
29.348	1.97426	0.50949
29.392	2.10352	0.125
29.436	2.08757	0.53333
29.48	2.05064	0.1936
29.524	2.23636	0.40559
29.568	2.23025	-0.12
29.612	2.2288	0.0993
29.656	2.33047	0.53333
29.7	2.41533	0.10725
29.744	2.32478	0.01754
29.788	2.36957	-0.33578
29.832	2.66648	0.09189
29.876	2.68902	0.42796
29.92	2.63998	-0.55556
29.964	2.75442	0.25783
30.008	2.85655	0.30543
30.052	2.93211	0.40267
30.096	3.09597	0.30543
30.14	3.01706	0.36723
30.184	3.05986	0.15349
30.228	3.14079	0.08497
30.272	3.29561	0.4487
30.316	3.32201	-0.12
30.36	3.28776	0.1329
30.404	3.69025	0.17037
30.448	3.74738	0.48599
30.492	3.87202	-0.12
30.536	3.83369	0.15752
30.58	4.05765	0.24678
30.624	4.2991	-0.00299
30.668	4.1499	0.25991
30.712	4.29362	0.15349
30.756	4.46205	-0.05299
30.8	4.49638	0.23636
30.844	4.73498	0.25783
30.888	4.84545	0.07438
30.932	5.00002	-0.01818
30.976	5.15912	0.05618
31.02	5.50867	0.11059
31.064	5.4926	0.1329
31.108	5.69865	0.29662
31.152	5.86909	0.09189
31.196	5.98621	-0.12
31.24	6.10608	-0.18644
31.284	6.40193	0.23636
31.328	6.46878	-0.12
31.372	6.59122	-0.16532
31.416	6.86706	0.26244
31.46	7.13309	0.03838
31.504	7.416	0.00994
31.548	7.52501	0.17037
31.592	7.72375	-0.18938
31.636	7.93233	-0.12
31.68	8.26354	0.24832
31.724	8.49486	0.21923
31.768	8.7804	0.00155
31.812	9.08176	-0.00583
31.856	9.22797	0.29263
31.9	9.53377	0.3614
31.944	9.88194	0.05954
31.988	10.2437	0.01754
32.032	10.6195	0.14576
32.076	10.8148	0.08103
32.12	11.0897	0.22336
32.164	11.5301	-0.4336
32.208	11.6745	0.03077
32.252	11.9814	-0.05827
32.296	12.5646	0.1329
32.34	13.1262	0.21127
32.384	13.485	0.03838
32.428	13.8641	-0.12
32.472	14.1434	-0.15862
32.516	14.8991	0.2456
32.56	14.9999	0.08276
32.604	15.4489	-0.06667
32.648	15.8971	0.28205
32.692	16.0214	0.00155
32.736	16.3007	-0.08213
32.78	16.8094	0.15578
32.824	17.4644	0.19751
32.868	17.918	0.07324
32.912	18.4893	0.1032
32.956	19.0252	0.04189
33	19.6666	-0.06667
33.044	20.3896	0.18154
33.088	21.0334	0.18082
33.132	21.5087	0.32414
33.176	22.4345	0.18447
33.22	23.4183	0.16168
33.264	23.483	-0.008
33.308	22.8443	0.06892
33.352	22.096	0.18447
33.396	21.1862	0.05137
33.44	20.4172	0.16629
33.484	20.1028	0.0368
33.528	19.3357	0.11579
33.572	18.8868	-0.07234
33.616	18.1344	0.05618
33.66	17.725	0.09845
33.704	17.2517	-0.000760456
33.748	16.6427	0.07324
33.792	16.072	0.24928
33.836	15.5181	0.12123
33.88	15.1597	0.01459
33.924	14.6049	0.05422
33.968	14.3187	0.00852
34.012	13.7657	0.03953
34.056	13.501	0.21127
34.1	13.0385	0.04681
34.144	12.6812	0.09189
34.188	12.2276	0.01364
34.232	11.9	0.15205
34.276	11.6133	0.05761
34.32	11.2883	0.27904
34.364	10.9412	0.03077
34.408	10.6206	0.08167
34.452	10.3161	0.07438
34.496	9.98859	0.04249
34.54	9.63079	0.06355
34.584	9.36821	0.00905
34.628	9.031	-0.01981
34.672	8.94204	0.19134
34.716	8.57771	0.09723
34.76	8.30205	0.14829
34.804	8.09731	0.15641
34.848	7.8782	0.07239
34.892	7.61976	0.10725
34.936	7.43029	0.08436
34.98	7.04623	0.11579
35.024	7.04631	0.2427
35.068	6.76638	0.03077
35.112	6.65705	0.28552
35.156	6.46019	0.0993
35.2	6.26156	-0.05439
35.244	6.11444	0.11287
35.288	5.82141	-0.12
35.332	5.61573	0.19706
35.376	5.47936	0.07174
35.42	5.37553	0.0368
35.464	5.19435	0.0439
35.508	5.13096	0.07539
35.552	5.09712	0.01067
35.596	4.77652	-0.15365
35.64	4.62004	0.04938
35.684	4.56516	0.01288
35.728	4.44777	0.04938
35.772	4.15951	0.16091
35.816	4.27488	0.14258
35.86	4.04347	0.13591
35.904	4.0576	0.17889
35.948	3.92141	0.02
35.992	3.75707	0.14066
36.036	3.63671	0.11965
36.08	3.42222	0.06667
36.124	3.39926	0.22087
36.168	3.53276	0.08276
36.212	3.20921	0.04333
36.256	3.09583	-0.01111
36.3	2.93584	-0.05574
36.344	3.04718	0.08632
36.388	2.88481	0.01459
36.432	2.74364	0.12988
36.476	2.80753	-0.02813
36.52	2.79627	0.15929
36.564	2.59552	0.19597
36.608	2.44887	0.0993
36.652	2.54744	0.14576
36.696	2.41722	-0.04121
36.74	2.39948	0.21556
36.784	2.289	0.09553
36.828	2.28057	0.04249
36.872	2.35065	0.0767
36.916	2.22052	0.09189
36.96	2.03629	0.07324
37.004	2.10101	0.08571
37.048	2.06179	0.08837
37.092	1.91355	-0.0165
37.136	1.97651	-0.00583
37.18	1.80025	0.18049
37.224	1.85972	-0.02291
37.268	1.77111	0.12123
37.312	1.6635	0.18947
37.356	1.77015	0.18049
37.4	1.7732	0.15349
37.444	1.71124	0.11678
37.488	1.68643	0.08497
37.532	1.58641	-0.03158
37.576	1.53491	0.04681
37.62	1.42084	0.21463
37.664	1.46666	-0.06667
37.708	1.40653	0.00994
37.752	1.44103	-0.15516
37.796	1.41365	0.04249
37.84	1.32638	-0.04314
37.884	1.32291	0.05954
37.928	1.31083	0.12889
37.972	1.21571	0.10492
38.016	1.26863	-0.02857
38.06	1.33346	0.02839
38.104	1.16602	0.12082
38.148	1.1077	0.05455
38.192	1.29224	-0.05827
38.236	1.06935	0.13216
38.28	1.11235	0.09606
38.324	1.06289	0.15152
38.368	1.04379	-0.03478
38.412	1.01875	0.13846
38.456	1.06074	-0.12
38.5	1.26663	0.25333
38.544	0.99588	0.08276
38.588	1.03029	0.22336
38.632	0.98339	-0.01111
38.676	0.78184	0.13155
38.72	0.96795	-0.01818
38.764	0.87255	0.29263
38.808	0.91607	0.07239
38.852	1.02236	0.04249
38.896	0.91998	0.03077
38.94	0.74735	-0.19612
38.984	0.8302	0.06127
39.028	0.96098	0.36723
39.072	0.83654	-0.18374
39.116	0.9969	0.11758
39.16	0.90266	0.18154
39.204	0.8394	0.16
39.248	0.93131	-0.12
39.292	0.78469	0.1954
39.336	0.738	0.24928
39.38	0.73086	0.05137
39.424	0.71107	0.02723
39.468	0.58116	0.02723
39.512	0.61472	0.13846
39.556	0.76611	0.05818
39.6	0.63907	0.125
39.644	0.58292	0.08497
39.688	0.64153	0.03576
39.732	0.45957	0.17037
39.776	0.62783	0.00645
39.82	0.57468	-0.01818
39.864	0.49388	-0.17895
39.908	0.62498	0.02609
39.952	0.621	-0.1596
39.996	0.56794	0.10962
40.04	0.80257	0.11965
40.084	0.77334	0.05618
40.128	0.65353	-0.12
40.172	0.58016	0.22087
40.216	0.72886	0.27742
40.26	0.78773	0.10189
40.304	0.75991	-0.07917
40.348	0.76439	0.076
40.392	0.8963	0.15152
40.436	0.7836	0.09677
40.48	0.71364	0.17037
40.524	0.84055	0.05043
40.568	0.84901	0.076
40.612	0.74329	0.05422
40.656	0.92931	0.17037
40.7	0.83276	0.1954
40.744	0.77611	0.31186
40.788	0.90298	0.17037
40.832	0.9034	-0.02722
40.876	0.75539	0.1329
40.92	0.9866	0.00994
40.964	0.81001	0.25039
41.008	1.06112	0.25039
41.052	1.04094	0.08632
41.096	0.96062	0.0993
41.14	0.92699	0.05137
41.184	1.01902	0.13155
41.228	0.96704	0.38706
41.272	1.24503	0.125
41.316	1.16651	0.15152
41.36	1.09327	0.20253
41.404	1.02671	0.17725
41.448	1.11115	0.53333
41.492	1.19362	0.20838
41.536	1.18497	0.08103
41.58	1.21754	0.05618
41.624	1.09436	0.15349
41.668	1.2264	0.00994
41.712	1.13688	-0.02722
41.756	1.39281	0.07122
41.8	1.35812	-0.18374
41.844	1.33172	0.15152
41.888	1.24004	0.11059
41.932	1.53824	0.02609
41.976	1.51799	0.50099
42.02	1.4778	0.04249
42.064	1.53955	0.17037
42.108	1.54723	0.08632
42.152	1.60027	0.10725
42.196	1.58676	0.08103
42.24	1.71131	0.09778
42.284	1.62375	0.07122
42.328	1.77559	-0.02629
42.372	1.86984	-0.03158
42.416	1.70083	0.3722
42.46	1.84863	-0.05299
42.504	1.87055	0.24324
42.548	1.89692	0.09189
42.592	2.05329	0.05137
42.636	2.02798	0.16289
42.68	2.10485	-0.1681
42.724	2.06381	0.18745
42.768	2.09222	0.24928
42.812	2.14928	0.01754
42.856	2.29216	0.17037
42.9	2.27448	0.125
42.944	2.47333	0.38581
42.988	2.40268	-0.02034
43.032	2.31651	-0.03321
43.076	2.59326	-0.07917
43.12	2.44039	0.07438
43.164	2.78904	0.05137
43.208	2.70441	0.2456
43.252	2.94851	0.09189
43.296	2.78408	0.18745
43.34	2.94211	-0.04673
43.384	3.10838	0.30693
43.428	2.98521	0.15752
43.472	3.25689	0.13846
43.516	3.22421	0.18659
43.56	3.22496	0.29431
43.604	3.4635	0.18659
43.648	3.52187	0.23636
43.692	3.64811	0.10189
43.736	3.85955	0.03448
43.78	3.79724	0.13645
43.824	3.92933	0.15349
43.868	4.00712	0.0767
43.912	4.03366	-0.17297
43.956	4.25242	-0.12
44	4.34637	-0.07807
44.044	4.55809	0.00645
44.088	4.61846	0.14829
44.132	4.73834	-0.07006
44.176	4.91403	0.07324
44.22	5.12196	0.07438
44.264	5.2377	0.10085
44.308	5.27629	0.1936
44.352	5.53858	-0.02439
44.396	5.60499	-0.00299
44.44	5.80028	0.09677
44.484	5.963	0.19641
44.528	6.23416	0.11758
44.572	6.44002	0.13645
44.616	6.5112	0.05954
44.66	6.77444	0.01754
44.704	7.00081	0.33014
44.748	7.05501	-0.08692
44.792	7.31334	0.09189
44.836	7.59375	-0.12
44.88	7.8161	0.22652
44.924	8.10811	-0.12
44.968	8.31542	0.07045
45.012	8.57368	-0.00853
45.056	8.79122	-0.02989
45.1	9.17042	0.22516
45.144	9.34049	0.15578
45.188	9.57486	0.08103
45.232	9.8822	0.25609
45.276	10.1503	0.21556
45.32	10.4303	0.15752
45.364	10.8073	0.11579
45.408	11.0724	-0.05574
45.452	11.5497	0.15752
45.496	11.8124	0.10189
45.54	12.2561	-0.01818
45.584	12.737	-0.01111
45.628	12.8413	0.28205
45.672	13.2879	0.2427
45.716	13.7111	0.18283
45.76	14.3328	0.00645
45.804	14.6154	-0.01818
45.848	14.9005	0.37778
45.892	15.6247	0.14829
45.936	15.9958	0.14957
45.98	16.5294	0.17585
46.024	16.7658	0.25461
46.068	16.8373	0.02519
46.112	17.4379	0.125
46.156	17.9936	-0.04314
46.2	18.4537	-0.12
46.244	18.8815	0.08497
46.288	19.5467	-0.03776
46.332	20.1967	0.02063
46.376	21.2935	0.05294
46.42	21.7209	0.19434
46.464	22.2363	0.08103
46.508	23.3397	0.14576
46.552	23.1945	-0.00719
46.596	22.7857	0.16629
46.64	21.9806	0.05954
46.684	21.3048	0.04681
46.728	20.665	-0.01818
46.772	19.7491	-0.19431
46.816	19.2296	0.07539
46.86	18.5346	0.16556
46.904	18.1639	0.15152
46.948	17.3586	-0.2274
46.992	17.1694	0.13846
47.036	16.387	0.17037
47.08	15.9721	0.1329
47.124	15.4097	0.05818
47.168	15.1296	0.00395
47.212	14.6771	0.0993
47.256	14.4111	0.1329
47.3	13.8142	-0.0876
47.344	13.4858	0.10725
47.388	13.0345	0.04681
47.432	12.5695	0.03838
47.476	12.1855	0.1954
47.52	11.9872	0.05509
47.564	11.4874	0.23636
47.608	11.0924	0.125
47.652	10.9403	-0.08692
47.696	10.5363	0.00395
47.74	10.1778	0.04681
47.784	9.93037	-0.00299
47.828	9.74961	0.07438
47.872	9.46158	0.23024
47.916	9.20441	-0.09404
47.96	8.84156	-0.02034
48.004	8.62269	0.18947
48.048	8.30334	0.00994
48.092	8.14784	-0.02241
48.136	7.91728	-0.02629
48.18	7.6292	0.05137
48.224	7.33611	0.04189
48.268	7.10642	0.076
48.312	6.93348	0.08788
48.356	6.80707	0.17037
48.4	6.48022	0.18283
48.444	6.4125	0.272
48.488	6.13928	0.12123
48.532	6.18023	0.21127
48.576	5.86185	-0.07917
48.62	5.65794	0.21307
48.664	5.65274	0.22588
48.708	5.42469	0.21923
48.752	5.24567	-0.05574
48.796	5.11274	0.2886
48.84	4.80911	0.08401
48.884	4.87008	0.10189
48.928	4.62415	0.01176
48.972	4.53956	0.2
49.016	4.33359	0.14902
49.06	4.3222	-0.00299
49.104	3.99608	0.02792
49.148	4.0581	0.1
49.192	4.13634	0.06393
49.236	3.79216	0.15472
49.28	3.71205	0.09189
49.324	3.55703	0.03077
49.368	3.46632	0.09606
49.412	3.48026	-0.12
49.456	3.30848	0.01517
49.5	3.19058	-0.1596
49.544	3.10348	0.08788
49.588	3.08036	0.07122
49.632	2.98041	0.07122
49.676	2.90359	0.26784
49.72	2.81228	0.02385
49.764	2.68068	-0.04314
49.808	2.59022	0.23636
49.852	2.64129	0.03448
49.896	2.53908	0.216
49.94	2.45763	-0.06842
49.984	2.43904	0.24832
50.028	2.34518	0.17457
50.072	2.22287	0.125
50.116	2.29177	0.08029
50.16	2.2679	-0.04121
50.204	2.09926	-0.12
50.248	2.12873	0.06186
50.292	2.04211	-0.00543
50.336	2.0671	0.34884
50.38	1.88383	0.12031
50.424	1.90423	0.06355
50.468	2.03918	0.06667
50.512	1.71843	0.03322
50.556	1.80626	0.29609
50.6	1.85457	0.05618
50.644	1.75868	-0.12
50.688	1.67185	0.02792
50.732	1.68377	0.09479
50.776	1.63844	-0.08302
50.82	1.42606	0.15349
50.864	1.53571	-0.09268
50.908	1.59153	0.01754
50.952	1.4967	0.10725
50.996	1.42218	0.24615
51.04	1.36058	0.17037
51.084	1.35938	0.09677
51.128	1.34671	-0.12
51.172	1.38836	0.07045
51.216	1.24314	0.10543
51.26	1.24945	-0.12
51.304	1.15407	0.01754
51.348	1.2328	0.14133
51.392	1.31701	-0.42154
51.436	1.22031	-0.12
51.48	1.1065	0.04249
51.524	1.09993	0.16289
51.568	1.09285	0.23024
51.612	1.25038	0.00905
51.656	1.16339	0.11878
51.7	1.12081	-0.01477
51.744	1.14785	-0.07807
51.788	0.94123	-0.02138
51.832	1.09652	0.13846
51.876	1.089	-0.35758
51.92	0.97169	0.13846
51.964	0.97321	0.06233
52.008	1.02759	-0.00299
52.052	0.93748	0.43669
52.096	1.03978	-0.20909
52.14	0.86661	0.076
52.184	0.85499	0.0411
52.228	0.91965	0.20253
52.272	0.72996	0.05294
52.316	0.9407	0.09677
52.36	0.93969	0.10962
52.404	0.97015	0.03448
52.448	0.71914	0.06667
52.492	0.74636	0.04681
52.536	0.76955	0.25532
52.58	0.72363	-0.06479
52.624	0.50538	0.11144
52.668	0.75773	0.30693
52.712	0.71174	0.02609
52.756	0.72227	0.16168
52.8	0.80253	0.07122
52.844	0.70042	0.34118
52.888	0.59907	0.25991
52.932	0.81265	-0.03478
52.976	0.47022	0.06667
53.02	0.75492	0.3
53.064	0.58471	0.23636
53.108	0.618	0.18447
53.152	0.77344	0.08103
53.196	0.49932	-0.12
53.24	0.49812	0.23636
53.284	0.57081	0.17037
53.328	0.49548	-2.73333
53.372	0.62127	-0.46087
53.416	0.6652	3.8
53.46	0.64352	0.17037
53.504	0.59602	3.8
53.548	0.66862	0.6093
53.592	0.71557	0.53333
53.636	0.56793	0.63871
53.68	0.7784	-0.12
53.724	0.47186	0.45366
53.768	0.6407	0.53333
53.812	0.76304	0.42069
53.856	0.74917	0.53333
53.9	0.70324	1
53.944	0.83698	-2.73333
53.988	0.7552	0.70526
54.032	0.90058	-2.73333
54.076	0.90953	3.8
54.12	0.83558	0.53333
54.164	0.98467	0.53333
54.208	0.806	-15.8
54.252	0.94052	0.34118
54.296	0.94557	1.24348
54.34	0.9716	3.8
54.384	0.96828	0.125
54.428	1.04543	1
54.472	0.88665	--
54.516	1.05039	3.8
54.56	0.93011	1
54.604	1.08508	-1.96471
54.648	1.06622	-1.35789
54.692	1.06119	1.62222
54.736	1.11075	0.23636
54.78	1.16518	-2.73333
54.824	1.18135	1
54.868	1.08823	0.17037
54.912	1.10088	2.49333
54.956	1.16272	-0.12
55	1.29528	1.62222
55.044	1.14482	0.70526
55.088	1.30348	0.70526
55.132	1.29045	-2.73333
55.176	1.26012	0.62162
55.22	1.43047	0.34118
55.264	1.36822	0.53333
55.308	1.51058	1
55.352	1.52671	-0.12
55.396	1.59404	-4.04
55.44	1.55119	--
55.484	1.54793	0.53333
55.528	1.60242	1.09655
55.572	1.29815	0.70526
55.616	1.4613	1
55.66	1.19968	0.8303
55.704	1.32491	0.34118
55.748	1.44279	-2.73333
55.792	1.12095	-0.12
55.836	1.13998	0.63871
55.88	1.21964	0.53333
55.924	1.25673	0.23636
55.968	1.0215	0.63871
56.012	1.17566	0.23636
56.056	1.18735	0.34118
56.1	1.0885	0.62162
56.144	1.15477	-6
56.188	1.14092	-15.8
56.232	1.0325	1
56.276	0.96992	-2.73333
56.32	0.96707	3.8
56.364	1.01273	0.25783
56.408	0.9071	1
56.452	0.9881	0.34118
56.496	1.00967	1.62222
56.54	0.71958	1
56.584	0.7923	0.75111
56.628	0.84563	0.58209
56.672	0.81693	1.62222
56.716	0.76225	0.8303
56.76	0.84026	0.42069
56.804	0.72375	-0.72308
56.848	1.01024	0.42069
56.892	0.7703	0.17037
56.936	0.82189	0.664
56.98	0.69974	1
57.024	0.8016	0.53333
57.068	0.64781	1.62222
57.112	0.62513	-0.12
57.156	0.66208	0.34118
57.2	0.70456	0.3913
57.244	0.69724	1
57.288	0.72802	0.34118
57.332	0.77289	0.4717
57.376	0.54787	0.70526
57.42	0.52607	-0.12
57.464	0.56051	1.35
57.508	0.65007	0.17037
57.552	0.64842	0.45366
57.596	0.48972	0.09189
57.64	0.61826	0.30959
57.684	0.54177	0.53333
57.728	0.56261	3.8
57.772	0.67242	-0.12
57.816	0.616	-0.72308
57.86	0.70231	0.70526
57.904	0.59298	-0.12
57.948	0.6053	0.70526
57.992	0.71384	-0.55556
58.036	0.58853	-15.8
58.08	0.58532	-2.73333
58.124	0.6697	3.8
58.168	0.50335	3.8
58.212	0.75093	-6
58.256	0.84188	0.3913
58.3	0.7343	1
58.344	0.88648	0.17037
58.388	0.76362	-0.12
58.432	0.91344	0.53333
58.476	0.92989	0.67536
58.52	0.90808	0.70526
58.564	0.88842	1.35
58.608	0.95763	0.53333
58.652	0.90961	-2.73333
58.696	0.73136	0.86
58.74	0.90814	0.88085
58.784	1.03911	0.63871
58.828	0.91343	0.65432
58.872	0.96175	2.01818
58.916	1.04232	1
58.96	0.84678	0.42069
59.004	1.10222	-2.73333
59.048	1.1111	0.70526
59.092	0.88641	1
59.136	1.13919	-0.12
59.18	1.12834	0.45366
59.224	1.06369	0.34118
59.268	1.16643	1.24348
59.312	1.09737	0.23636
59.356	1.07139	-2.73333
59.4	1.16752	0.70526
59.444	1.02369	0.34118
59.488	1.21577	0.53333
59.532	1.45887	0.53333
59.576	1.20483	2.01818
59.62	1.2526	0.45366
59.664	1.37932	-0.12
59.708	1.33337	-0.12
59.752	1.39784	23.4
59.796	1.35029	0.53333
59.84	1.47685	0.53333
59.884	1.46484	0.53333
59.928	1.49238	0.06667
59.972	1.43892	0.53333
60.016	1.45103	1.15135
60.06	1.40008	1.62222
60.104	1.35869	-0.12
60.148	1.41657	0.70526
60.192	1.3263	0.78462
60.236	1.29678	--
60.28	1.26613	3.8
60.324	1.32243	3.8
60.368	1.0819	0.45366
60.412	1.15898	1
60.456	1.20601	1
60.5	1.14856	-0.12
60.544	1.32748	0.34118
60.588	1.18268	0.53333
60.632	1.09179	1.62222
60.676	1.1277	0.42069
60.72	1.03175	1
60.764	0.9345	1
60.808	0.96889	0.63871
60.852	1.09496	-1.1
60.896	0.98896	0.4717
60.94	1.04442	0.81017
60.984	0.97331	1.62222
61.028	0.97411	-0.55556
61.072	1.032	-0.12
61.116	0.8692	0.664
61.16	0.85708	1
61.204	0.74068	3.8
61.248	0.91985	-0.72308
61.292	0.74134	0.53333
61.336	0.84857	0.53333
61.38	0.72475	-0.72308
61.424	0.74043	0.53333
61.468	0.72205	--
61.512	0.71603	-0.12
61.556	0.74232	-0.12
61.6	0.75626	1
61.644	0.75581	1.24348
61.688	0.68968	1.39298
61.732	0.6845	1.24348
61.776	0.73335	-0.12
61.82	0.51519	23.4
61.864	0.61516	1.24348
61.908	0.62642	1
61.952	0.6329	3.8
61.996	0.54726	0.70526
62.04	0.54879	1.62222
62.084	0.53259	0.34118
62.128	0.60553	0.53333

## Sheet: Figure 1D
time (s)	force (pN)	FRET efficiency
0.044	0.49916	0.73333
0.088	0.46821	0.4949
0.132	0.68196	0.8303
0.176	0.40681	0.72
0.22	0.45764	0.63765
0.264	0.5232	0.968
0.308	0.51862	0.84865
0.352	0.59422	0.67484
0.396	0.47069	1.032
0.44	0.54304	0.54723
0.484	0.54866	0.64255
0.528	0.55007	0.7984
0.572	0.48084	0.78811
0.616	0.57002	1.20741
0.66	0.55702	0.74154
0.704	0.57229	0.53164
0.748	0.65582	0.43018
0.792	0.83209	0.46333
0.836	0.54963	0.95692
0.88	0.58616	0.64
0.924	0.74856	0.74333
0.968	0.59527	0.6841
1.012	0.6604	0.664
1.056	0.83444	0.88
1.1	0.63836	0.76558
1.144	0.60923	0.91805
1.188	0.70046	0.76242
1.232	0.62602	0.59024
1.276	0.70304	0.52711
1.32	0.85675	0.78462
1.364	0.83301	0.96889
1.408	0.94513	0.64075
1.452	0.84451	0.4949
1.496	0.9523	0.524
1.54	1.07045	1.16
1.584	0.69351	0.79897
1.628	0.9005	0.69667
1.672	1.10372	0.7471
1.716	1.13013	0.50877
1.76	1.07329	0.57517
1.804	0.9482	1.43077
1.848	1.07914	0.804
1.892	1.11057	0.83529
1.936	0.9529	0.616
1.98	1.21751	0.94909
2.024	1.17547	0.79636
2.068	1.28228	0.5296
2.112	1.12321	0.7536
2.156	1.37175	0.72966
2.2	1.2658	0.69021
2.244	1.34043	0.58
2.288	1.36254	1.37333
2.332	1.58947	0.70667
2.376	1.38318	0.81838
2.42	1.48358	0.63765
2.464	1.57453	0.84444
2.508	1.61366	0.85391
2.552	1.44948	0.916
2.596	1.46936	0.57067
2.64	1.60649	0.60649
2.684	1.7523	0.59024
2.728	1.72747	0.51636
2.772	1.6455	0.58737
2.816	1.84038	0.61818
2.86	1.93737	0.97128
2.904	1.82041	0.904
2.948	1.91926	0.57106
2.992	1.98877	0.54769
3.036	2.07108	0.64632
3.08	2.05723	0.40945
3.124	2.01625	0.5968
3.168	2.23175	0.37778
3.212	2.23104	0.79897
3.256	2.40175	0.70133
3.3	2.49068	0.51636
3.344	2.49016	0.57736
3.388	2.40547	0.67484
3.432	2.46972	0.68348
3.476	2.61154	0.67172
3.52	2.62553	0.59273
3.564	2.82711	0.65333
3.608	2.69395	0.4848
3.652	2.83319	0.524
3.696	2.93705	0.82957
3.74	3.02946	0.76242
3.784	2.9795	0.41493
3.828	3.21938	0.63765
3.872	3.19517	0.40426
3.916	3.43408	0.79368
3.96	3.48296	0.72
4.004	3.60981	0.70526
4.048	3.563	0.6841
4.092	3.72673	0.57176
4.136	3.93596	0.53164
4.18	3.98067	0.8
4.224	4.0406	0.93
4.268	4.03207	0.63535
4.312	4.54339	0.4624
4.356	4.42865	0.51467
4.4	4.65982	0.3056
4.444	4.72328	0.63765
4.488	4.92152	0.91158
4.532	4.99716	0.2
4.576	5.20911	0.21091
4.62	5.41739	0.30894
4.664	5.59245	0.48541
4.708	5.69485	0.42902
4.752	6.08996	0.40889
4.796	6.15175	0.615
4.84	6.43433	0.45697
4.884	6.74914	0.62667
4.928	6.79063	0.59024
4.972	6.97048	0.524
5.016	7.15849	0.0816
5.06	7.52535	0.00108
5.104	7.6835	0.11333
5.148	7.8918	0.40889
5.192	8.20998	0.56727
5.236	8.46796	0.76242
5.28	8.93578	0.496
5.324	9.01665	0.22704
5.368	9.34419	0.42756
5.412	9.71685	0.42486
5.456	9.91524	0.16
5.5	10.3748	0.37171
5.544	10.6761	0.36276
5.588	10.9096	0.27529
5.632	11.3808	0.30378
5.676	11.7954	0.24522
5.72	12.1824	0.17333
5.764	12.6806	0.28923
5.808	12.3645	-0.008
5.852	12.7711	0.23636
5.896	13.2598	0.08364
5.94	13.5492	0.14047
5.984	13.9746	-0.01161
6.028	14.5444	0.06667
6.072	14.8267	-0.04774
6.116	15.4645	0.08632
6.16	15.8611	0.1488
6.204	16.5016	-0.0528
6.248	16.9279	0.02359
6.292	17.6184	0.17217
6.336	18.2062	0.03273
6.38	18.8325	-0.01073
6.424	19.4524	-0.08706
6.468	19.9745	-0.02468
6.512	20.618	0
6.556	21.2419	0.09677
6.6	21.8687	0.07385
6.644	23.1704	0.00727
6.688	23.157	-0.08387
6.732	22.8637	0.00923
6.776	21.7243	0.05231
6.82	21.2124	0.05043
6.864	20.4692	-0.03704
6.908	19.8705	-0.02118
6.952	19.1618	0.08364
6.996	18.6029	-0.05412
7.04	17.9819	-0.05412
7.084	17.5183	0.08364
7.128	16.8087	-0.1
7.172	16.3756	-0.07692
7.216	15.7945	0.26957
7.26	15.3413	0.26769
7.304	15.03	0.05231
7.348	14.5878	0.12
7.392	13.9964	0.0592
7.436	13.5914	0.08
7.48	13.1707	0.28
7.524	12.5997	-0.00333
7.568	12.1629	0.06667
7.612	11.9677	0.03556
7.656	11.5136	0.1488
7.7	11.2434	0.00108
7.744	10.8052	0.04471
7.788	10.4848	0.1183
7.832	10.1097	-0.00211
7.876	9.69592	0.04
7.92	9.35258	-0.05946
7.964	9.22002	0.264
8.008	8.82392	0.07911
8.052	8.6819	0.22462
8.096	8.32284	0.125
8.14	8.09946	0.0592
8.184	7.91286	-0.05946
8.228	7.48067	0.08364
8.272	7.34332	0.09677
8.316	6.96941	0.12889
8.36	6.81843	0.02933
8.404	6.65403	0.09778
8.448	6.37876	0.24235
8.492	6.22343	-0.0304
8.536	6.04285	0.02519
8.58	5.96748	0.12216
8.624	5.7097	0.40267
8.668	5.5543	0.37778
8.712	5.34415	-0.064
8.756	5.22709	0.24465
8.8	5.05307	0.05231
8.844	4.80022	0.23
8.888	4.78385	0.37778
8.932	4.66798	-0.00513
8.976	4.60102	0.09913
9.02	4.22462	0.46074
9.064	4.29571	0.21811
9.108	4.12636	0.0592
9.152	3.86802	0.14353
9.196	3.95271	0.11172
9.24	3.77109	0.24
9.284	3.55477	0.07478
9.328	3.65701	0.10974
9.372	3.44223	0.09854
9.416	3.43343	-0.06791
9.46	3.27254	0.06667
9.504	3.40209	-0.16
9.548	3.16133	-0.04656
9.592	3.00865	0.28727
9.636	2.87604	0.02
9.68	3.09887	0.53032
9.724	2.77218	0.22169
9.768	2.7497	-0.05
9.812	2.67271	0.02
9.856	2.60888	0.17474
9.9	2.39385	0.06667
9.944	2.27634	-0.02667
9.988	2.43397	-0.02667
10.032	2.43079	0.05231
10.076	2.39541	0.08632
10.12	2.07479	0.01576
10.164	2.13281	-0.15733
10.208	2.00947	0.04471
10.252	1.94746	0.21939
10.296	2.0225	-0.12
10.34	1.99884	-0.03158
10.384	1.7686	0.10909
10.428	1.77791	0.19111
10.472	1.76571	0.04471
10.516	1.62211	-0.12
10.56	1.67532	-0.07333
10.604	1.67657	-0.33
10.648	1.63506	0.12
10.692	1.48461	0.09333
10.736	1.45632	0.076
10.78	1.42726	-0.056
10.824	1.38756	0.072
10.868	1.52446	0.048
10.912	1.25855	0.07064
10.956	1.3437	-0.015
11	1.32346	0.34667
11.044	1.23458	-0.01581
11.088	1.28346	-0.12
11.132	1.235	-0.05946
11.176	1.27965	-0.14947
11.22	1.34869	-0.04696
11.264	1.12664	0.09778
11.308	1.17694	0.14047
11.352	1.008	-0.2
11.396	1.04166	0.136
11.44	1.07621	0.03628
11.484	1.01259	-0.09053
11.528	0.97088	-0.24
11.572	1.06675	-0.01818
11.616	0.99683	-0.26
11.66	1.0375	0.008
11.704	1.01006	0.14353
11.748	0.77592	-0.12
11.792	1.01175	0.03273
11.836	0.94287	-0.008
11.88	0.98716	-0.12
11.924	0.84959	-0.68
11.968	0.84839	-0.04186
12.012	0.92484	0.21185
12.056	0.77954	0.00108
12.1	0.79004	-0.07692
12.144	0.7268	-0.00211
12.188	0.95512	0.02452
12.232	0.47884	0.01333
12.276	0.67621	0.44
12.32	0.53734	1.3136
12.364	0.57721	0.80878
12.408	0.62218	0.8902
12.452	0.72772	0.53032
12.496	0.65012	0.63385
12.54	0.64787	1.112
12.584	0.65891	0.96387
12.628	0.75036	1.05895
12.672	0.55576	0.61684
12.716	0.51684	1.11586
12.76	0.38414	0.95852
12.804	0.49664	0.87077
12.848	0.42545	0.89818
12.892	0.36708	0.57176
12.936	0.45048	0.4848
12.98	0.56443	0.64255
13.024	0.5156	0.804
13.068	0.51321	0.5
13.112	0.47915	0.73217
13.156	0.50185	0.96267
13.2	0.32488	0.96267
13.244	0.36765	0.79368
13.288	0.4743	0.87556
13.332	0.26087	0.74154
13.376	0.44609	0.66703
13.42	0.43589	0.81333
13.464	0.50442	0.79897
13.508	0.25604	0.86
13.552	0.53376	0.71349
13.596	0.46283	0.76
13.64	0.51261	0.51
13.684	0.572	1.09882
13.728	0.6911	0.78462
13.772	0.62127	0.584
13.816	0.79711	0.55721
13.86	0.71197	0.67262
13.904	0.72946	0.804
13.948	0.75993	0.94105
13.992	0.48332	0.72622
14.036	0.83996	0.6614
14.08	0.75483	0.60649
14.124	0.65637	0.55667
14.168	0.62384	0.71451
14.212	0.58918	0.48098
14.256	0.63676	0.73867
14.3	0.59565	1.88
14.344	0.8016	1.14
14.388	0.71805	0.96606
14.432	0.73383	0.87077
14.476	0.84169	0.904
14.52	0.79648	0.6
14.564	0.89582	0.76
14.608	0.87216	1.04308
14.652	0.89648	0.74857
14.696	0.88284	0.59489
14.74	1.10313	0.84444
14.784	1.03183	0.584
14.828	0.87317	0.64741
14.872	0.91797	0.76
14.916	0.95799	1.04
14.96	1.02837	0.62
15.004	1.08847	1.0448
15.048	0.96314	0.54667
15.092	1.12283	0.48098
15.136	1.06514	0.69455
15.18	1.12472	0.55623
15.224	1.23071	0.63385
15.268	1.14889	0.90667
15.312	1.37269	1.28
15.356	1.25667	0.48667
15.4	1.2488	0.65333
15.444	1.28464	0.45018
15.488	1.57713	1.04148
15.532	1.30573	0.61231
15.576	1.36634	0.944
15.62	1.48324	0.67059
15.664	1.42953	0.328
15.708	1.41931	0.71097
15.752	1.56919	0.40706
15.796	1.6459	0.89161
15.84	1.64411	0.65333
15.884	1.64529	1.26667
15.928	1.42356	0.73474
15.972	1.82541	0.67172
16.016	1.68426	0.65115
16.06	1.94706	0.78553
16.104	1.81037	0.51304
16.148	1.84908	0.66703
16.192	1.75821	0.62667
16.236	1.87905	1.04148
16.28	1.97308	0.62
16.324	1.93358	0.51636
16.368	1.98018	0.63765
16.412	2.1762	0.36364
16.456	2.15853	0.64075
16.5	2.18036	0.67579
16.544	2.50553	0.63932
16.588	2.28326	0.7471
16.632	2.31747	0.53164
16.676	2.52185	0.45098
16.72	2.54549	0.45806
16.764	2.59214	0.6614
16.808	2.75575	1.08
16.852	2.81906	0.895
16.896	2.90705	0.55789
16.94	2.9389	0.4925
16.984	2.92433	0.78811
17.028	2.93472	0.43138
17.072	3.08883	1.28
17.116	3.38782	0.72
17.16	3.28328	0.93778
17.204	3.41531	0.44
17.248	3.50158	0.24615
17.292	3.70597	0.33684
17.336	3.81844	0.335
17.38	3.73205	0.356
17.424	3.91949	0.55623
17.468	4.02432	0.45436
17.512	4.22009	0.72
17.556	4.28794	0.53882
17.6	4.45452	0.47733
17.644	4.56869	0.81935
17.688	4.59502	0.47733
17.732	4.79712	0.5968
17.776	4.82676	0.73787
17.82	5.10456	1.24
17.864	5.12914	0.412
17.908	5.413	0.2
17.952	5.82191	0.38105
17.996	5.81188	0.49957
18.04	5.91456	0.3566
18.084	6.25558	0.48444
18.128	6.41473	0.888
18.172	6.62387	0.51636
18.216	6.89135	0.38286
18.26	6.9633	0.06667
18.304	7.28951	0.49333
18.348	7.45144	0.37356
18.392	7.73677	0.776
18.436	8.10766	1.09333
18.48	8.33973	0.45806
18.524	8.56078	0.33405
18.568	8.8965	0.69103
18.612	9.08462	1.056
18.656	9.2189	0.64364
18.7	9.61187	0.79429
18.744	10.032	1.17684
18.788	10.2824	0.44
18.832	10.6545	0.31707
18.876	11.0902	0.84
18.92	11.3337	0.32211
18.964	11.7804	0.2
19.008	12.2102	0.31707
19.052	12.6228	0.05818
19.096	13.009	-0.015
19.14	13.321	0.405
19.184	13.7396	0.51179
19.228	14.3313	0.17867
19.272	14.1024	0.18333
19.316	14.6835	0.02452
19.36	15.0484	-0.07333
19.404	15.4172	-0.18788
19.448	15.9322	0.14133
19.492	16.5413	-0.12
19.536	17.2414	0.06162
19.58	17.8282	0.02
19.624	18.4201	0.076
19.668	18.8813	0.2
19.712	19.3118	-0.03805
19.756	20.0486	0.08364
19.8	20.6775	0.14
19.844	21.5794	-0.09667
19.888	21.8687	0.05231
19.932	22.8564	0.06667
19.976	23.2487	-0.20296
20.02	22.8113	0.14353
20.064	21.8657	0.31556
20.108	21.1132	0.14353
20.152	20.4499	-0.008
20.196	19.8282	0.09913
20.24	19.3206	0.06162
20.284	18.6823	0.055
20.328	17.9957	0.0592
20.372	17.5144	-0.01333
20.416	16.9536	-0.12
20.46	16.1544	0.05231
20.504	15.7561	0.3
20.548	15.3251	-0.12
20.592	15.0294	0.13455
20.636	14.4364	0.26316
20.68	14.0612	0.16
20.724	13.4432	0.16
20.768	13.1771	0.03448
20.812	12.6792	0.16
20.856	12.4119	-0.232
20.9	12.0097	0.16
20.944	11.5168	-0.02261
20.988	11.1782	0.072
21.032	10.9025	-0.148
21.076	10.523	0.11333
21.12	10.2477	-0.05212
21.164	9.95987	0.02933
21.208	9.63626	0.00108
21.252	9.21576	-0.16667
21.296	9.09858	0.29067
21.34	8.94902	-0.064
21.384	8.43141	0.09333
21.428	8.18446	-0.04774
21.472	7.991	0.16903
21.516	7.65861	-0.12
21.56	7.30886	0.008
21.604	7.05028	-0.08267
21.648	6.91384	-0.52727
21.692	6.62027	0.08
21.736	6.51111	-0.12
21.78	6.30052	0.05569
21.824	5.96412	0.01176
21.868	5.82244	-0.04276
21.912	5.71548	-0.03704
21.956	5.57193	-0.15733
22	5.51598	-0.16667
22.044	5.17108	-0.00333
22.088	5.04465	-0.008
22.132	4.86789	-0.00211
22.176	4.68226	-0.01073
22.22	4.53507	0.03628
22.264	4.47221	-0.03704
22.308	4.38924	0.02452
22.352	4.19561	0.16903
22.396	3.9339	-0.01161
22.44	4.13166	-0.05946
22.484	3.90702	0.04471
22.528	3.64656	0.0592
22.572	3.6485	0.05818
22.616	3.59125	-0.27273
22.66	3.52754	0.11059
22.704	3.29609	0.05684
22.748	3.17604	-0.08
22.792	3.10019	-0.08
22.836	3.15103	-0.12
22.88	2.85306	0.195
22.924	3.04815	0.41333
22.968	2.7866	0.05231
23.012	2.85527	0.12889
23.056	2.76003	-0.33333
23.1	2.67155	-0.05946
23.144	2.6144	-0.05946
23.188	2.55947	0.2
23.232	2.45593	0.16596
23.276	2.44316	0.44
23.32	2.255	0.05379
23.364	2.26261	-0.02261
23.408	2.35635	-0.07774
23.452	2.15232	0.125
23.496	2.04088	-0.06537
23.54	2.08221	-0.28593
23.584	2.0367	-0.16
23.628	1.89082	0.04258
23.672	1.82112	0.2
23.716	2.03128	-0.12
23.76	1.72305	0.44
23.804	1.57352	-0.008
23.848	1.82972	-0.12
23.892	1.59541	0.08
23.936	1.59254	-0.0304
23.98	1.65738	-0.02
24.024	1.6123	0.02519
24.068	1.45314	0.11579
24.112	1.39664	-0.01333
24.156	1.55027	-0.06537
24.2	1.51331	-0.12
24.244	1.58843	-0.08
24.288	1.5063	0.01714
24.332	1.4755	0.11172
24.376	1.3965	0.07478
24.42	1.45014	0.28727
24.464	1.21823	-0.04
24.508	1.31648	-0.12
24.552	1.33061	0.16
24.596	1.24794	0.14526
24.64	1.1955	-0.12
24.684	1.14395	0.2
24.728	1.2751	0.16
24.772	1.25194	0.49091
24.816	1.13174	-0.12
24.86	1.30083	0.65241
24.904	1.319	1.46118
24.948	1.0352	0.69846
24.992	1.00758	0.60593
25.036	1.00978	0.895
25.08	1.06883	1.12923
25.124	1.00093	0.78323
25.168	0.89372	0.58933
25.212	0.9818	0.76558
25.256	0.98264	0.78811
25.3	0.98356	0.8069
25.344	0.90453	1.59294
25.388	0.73949	1.19765
25.432	0.70482	0.34345
25.476	0.84519	0.64488
25.52	0.75344	1.21538
25.564	0.81121	0.42634
25.608	0.68598	0.63765
25.652	0.8381	0.80235
25.696	0.72883	1
25.74	0.61577	0.6864
25.784	0.63452	1.224
25.828	0.63598	0.55789
25.872	0.69821	0.888
25.916	0.53292	0.96606
25.96	0.55879	0.376
26.004	0.72553	0.60471
26.048	0.68301	0.42486
26.092	0.80767	0.73867
26.136	0.70657	0.72
26.18	0.52534	0.392
26.224	0.61328	0.61143
26.268	0.69526	0.61379
26.312	0.51628	0.73867
26.356	0.65084	0.35385
26.4	0.52649	0.62667
26.444	0.63852	0.88
26.488	0.40629	0.88414
26.532	0.47678	0.94105
26.576	0.48251	0.44
26.62	0.45493	0.8303
26.664	0.53178	0.615
26.708	0.62458	0.82316
26.752	0.61665	0.61756
26.796	0.4003	0.95692
26.84	0.49901	0.74154
26.884	0.61476	0.66703
26.928	0.67111	0.55789
26.972	0.53961	1.14
27.016	0.74063	0.81333
27.06	0.75424	0.6614
27.104	0.63691	0.64632
27.148	0.77754	0.584
27.192	0.71346	0.79259
27.236	0.66148	0.832
27.28	0.69361	0.888
27.324	0.71804	0.93412
27.368	0.61278	0.648
27.412	0.76604	0.87077
27.456	0.5594	0.46333
27.5	0.68266	0.65241
27.544	0.82901	0.888
27.588	0.63209	0.79259
27.632	0.80293	0.52296
27.676	0.70212	1.21538
27.72	0.87247	0.51467
27.764	0.82546	0.62667
27.808	0.89611	0.95852
27.852	0.94872	1
27.896	0.93079	0.73217
27.94	0.88843	0.61962
27.984	0.966	0.456
28.028	0.97314	0.6
28.072	1.02328	0.68348
28.116	0.93189	0.67059
28.16	1.01212	0.335
28.204	1.06224	8.28
28.248	0.95225	0.70353
28.292	1.1194	0.86
28.336	1.28086	0.648
28.38	1.31905	0.475
28.424	1.1231	0.96267
28.468	1.1093	0.40571
28.512	1.22506	0.84444
28.556	1.23373	1.31111
28.6	1.26649	1.24348
28.644	1.10633	0.38667
28.688	1.18377	0.69846
28.732	1.38722	1.672
28.776	1.45105	0.748
28.82	1.36379	0.81935
28.864	1.51655	0.545
28.908	1.51582	0.66703
28.952	1.4783	0.63765
28.996	1.63406	0.81333
29.04	1.56803	0.62667
29.084	1.53954	0.90118
29.128	1.54298	0.83529
29.172	1.63778	0.53561
29.216	1.6648	0.392
29.26	1.85179	0.50588
29.304	1.6687	0.475
29.348	1.70714	0.56571
29.392	1.92849	0.57106
29.436	1.75567	0.4575
29.48	2.06043	1.29474
29.524	1.99917	0.70526
29.568	1.96968	0.64632
29.612	2.09101	0.77091
29.656	2.32408	0.69951
29.7	2.2008	1.03394
29.744	2.22537	0.63765
29.788	2.34213	0.86
29.832	2.50769	0.81935
29.876	2.43734	0.28976
29.92	2.43	0.73787
29.964	2.41577	1.224
30.008	2.62964	0.74545
30.052	2.6244	0.42943
30.096	2.65679	0.51396
30.14	2.74844	0.776
30.184	2.77853	0.8656
30.228	2.90201	0.84372
30.272	3.11651	0.96706
30.316	3.08094	0.944
30.36	3.17341	0.46545
30.404	3.29199	1.12444
30.448	3.33544	0.93412
30.492	3.44407	0.42756
30.536	3.57332	0.37778
30.58	3.71588	0.96
30.624	3.76651	0.36276
30.668	3.70913	0.82182
30.712	3.91939	0.8303
30.756	4.07948	0.78462
30.8	4.41065	0.71451
30.844	4.30552	0.49957
30.888	4.37438	0.67644
30.932	4.81369	0.4848
30.976	4.68594	0.55623
31.02	4.92012	0.57236
31.064	5.055	0.65333
31.108	5.1613	0.62667
31.152	5.20386	1.77
31.196	5.59014	1.28
31.24	5.59819	0.712
31.284	5.7748	0.42486
31.328	6.0286	0.755
31.372	6.10702	0.53032
31.416	6.47613	0.16444
31.46	6.42201	0.1183
31.504	6.85128	0.328
31.548	6.98466	0.61231
31.592	7.23416	0.50588
31.636	7.45413	0.40889
31.68	7.84645	0.67484
31.724	7.98361	0.61231
31.768	8.29227	0.456
31.812	8.38621	0.14667
31.856	8.87808	0.34118
31.9	9.1756	0.19256
31.944	9.56694	-0.01333
31.988	9.76186	-0.064
32.032	10.0929	0.09913
32.076	10.5086	0.2
32.12	10.5566	-0.064
32.164	11.0333	0.64
32.208	11.4822	0.18373
32.252	11.8816	0.14133
32.296	12.1989	0.44
32.34	12.412	0.08364
32.384	13.0221	0.0368
32.428	13.0936	-0.02468
32.472	13.7177	0.18333
32.516	14.1303	-0.288
32.56	14.8536	0.09101
32.604	15.1927	-0.00513
32.648	15.6544	-0.0061
32.692	16.2226	0.11333
32.736	16.7041	-0.12
32.78	17.2843	0.272
32.824	17.6889	0.02
32.868	18.0542	0.328
32.912	18.3257	0.076
32.956	19.0586	-0.33
33	19.5039	-0.21739
33.044	20.092	0.14526
33.088	20.7725	-0.02667
33.132	21.5052	-0.05778
33.176	22.345	-0.02261
33.22	23.3425	0.02
33.264	23.5161	0.44
33.308	22.802	-0.12
33.352	22.1915	0.01176
33.396	21.3761	-0.12
33.44	20.6005	0.23
33.484	19.959	-0.32364
33.528	19.3118	0.12
33.572	18.6546	-0.568
33.616	18.0064	-0.056
33.66	17.6138	0.26244
33.704	16.9417	-0.4
33.748	16.2807	0.24129
33.792	15.7217	0.03135
33.836	15.3906	0.19111
33.88	15.0213	0.21185
33.924	14.537	-0.14947
33.968	14.0319	0.35158
34.012	13.5947	0.03775
34.056	13.1414	0.02933
34.1	12.6896	0.11579
34.144	12.4748	0.08632
34.188	11.8938	-0.07692
34.232	11.8135	-0.04
34.276	11.1272	-0.07333
34.32	10.8046	-0.0163
34.364	10.4376	-0.27448
34.408	10.2054	0.04471
34.452	9.75196	-0.26
34.496	9.54715	-0.21739
34.54	9.32835	0.03273
34.584	8.84418	-0.01333
34.628	8.6289	0.34667
34.672	8.39691	0.21939
34.716	7.93438	0.01176
34.76	7.8681	0.08364
34.804	7.5383	0.048
34.848	7.36833	0.00923
34.892	7.2209	-0.19226
34.936	6.78529	-0.06537
34.98	6.71134	-0.08267
35.024	6.38783	-0.12
35.068	6.07136	0.17217
35.112	6.11881	-0.12
35.156	5.95272	0.09333
35.2	5.76262	0.35158
35.244	5.48002	0.14133
35.288	5.25192	-0.12
35.332	5.08522	-0.06909
35.376	5.10986	0.20667
35.42	4.84615	-0.32364
35.464	4.77471	0.16
35.508	4.6681	-0.12
35.552	4.41293	-0.02261
35.596	4.28179	-0.008
35.64	4.1538	0.072
35.684	4.08724	-0.05
35.728	4.08913	0.46947
35.772	3.8967	0.11579
35.816	3.82948	0.10857
35.86	3.569	-0.16667
35.904	3.48675	-0.01581
35.948	3.53026	0.04471
35.992	3.21232	0.12889
36.036	3.25835	-0.00211
36.08	3.2175	0.28
36.124	3.01059	-0.12
36.168	2.86852	0.21091
36.212	2.97928	-0.15027
36.256	2.82176	0.02933
36.3	2.86105	-0.44
36.344	2.58025	-0.03704
36.388	2.57959	0.06
36.432	2.63223	0.0592
36.476	2.48938	-0.064
36.52	2.3294	0.23636
36.564	2.40641	0.104
36.608	2.45928	-0.12
36.652	2.31923	0.30667
36.696	2.18308	-0.0414
36.74	2.11782	-0.04774
36.784	2.05885	0.1183
36.828	2.04657	0.21185
36.872	1.90902	-0.12
36.916	2.02497	-0.06909
36.96	1.94134	0.04333
37.004	1.90825	0.28205
37.048	1.72691	0.65
37.092	1.67939	0.14526
37.136	1.70805	0.06667
37.18	1.82617	-0.0304
37.224	1.62784	0.0592
37.268	1.82019	0.14133
37.312	1.66504	0.14783
37.356	1.43497	-0.02857
37.4	1.46502	-0.07692
37.444	1.54485	-0.36
37.488	1.36258	0.22462
37.532	1.51016	0.055
37.576	1.35701	-0.12
37.62	1.51709	0.09778
37.664	1.36539	0.00923
37.708	1.27337	0.6841
37.752	1.27992	0.96889
37.796	1.32965	0.90667
37.84	1.20497	0.65241
37.884	1.24537	1.096
37.928	1.21949	0.72966
37.972	1.28456	0.71451
38.016	1.13007	0.62667
38.06	1.1545	0.79897
38.104	1.19001	1.056
38.148	1.1365	0.95692
38.192	1.0655	1.03733
38.236	0.9979	0.825
38.28	1.02473	0.81935
38.324	0.86257	1.10839
38.368	0.99438	0.475
38.412	0.91101	0.74154
38.456	0.93268	0.72
38.5	1.00069	0.81333
38.544	1.00622	0.78222
38.588	0.88015	1.49
38.632	0.70651	0.8069
38.676	0.82599	0.692
38.72	0.88518	0.46545
38.764	0.75803	0.75415
38.808	0.81734	0.96
38.852	0.84918	0.75652
38.896	0.78395	0.664
38.94	0.81538	0.47733
38.984	0.7283	0.38149
39.028	0.71041	0.29391
39.072	0.74977	0.37
39.116	0.54103	0.888
39.16	0.7306	0.26621
39.204	0.68614	0.59024
39.248	0.58407	0.88
39.292	0.58814	0.78087
39.336	0.6248	0.6614
39.38	0.84303	0.75652
39.424	0.64104	0.62667
39.468	0.55525	0.69951
39.512	0.581	0.84
39.556	0.61927	0.45191
39.6	0.68877	0.60649
39.644	0.69527	0.73867
39.688	0.47717	0.52
39.732	0.41591	0.67059
39.776	0.39514	0.61684
39.82	0.42229	0.6093
39.864	0.42227	0.89818
39.908	0.32918	1.25455
39.952	0.51668	0.45697
39.996	0.41861	0.51636
40.04	0.53593	0.69951
40.084	0.54326	0.776
40.128	0.70301	1.46118
40.172	0.59315	0.664
40.216	0.54309	0.63765
40.26	0.58943	0.81333
40.304	0.68432	0.65778
40.348	0.5139	0.72
40.392	0.61306	0.6864
40.436	0.71774	0.81333
40.48	0.61372	0.4
40.524	0.62837	1.29474
40.568	0.69077	0.57176
40.612	0.70476	0.888
40.656	0.68705	0.48148
40.7	0.66913	0.56727
40.744	0.64915	1.77538
40.788	0.69279	0.40426
40.832	0.72157	1.03111
40.876	0.96642	0.76667
40.92	0.76677	0.44
40.964	0.92976	0.608
41.008	0.82603	1.12444
41.052	0.86324	0.72
41.096	0.82299	1.14609
41.14	0.94032	0.64
41.184	0.96027	0.82578
41.228	0.92291	0.38581
41.272	0.87307	0.92533
41.316	0.90228	0.62667
41.36	0.95668	0.70353
41.404	1.0263	0.58
41.448	1.01248	0.79259
41.492	1.14701	0.66061
41.536	1.10286	0.74545
41.58	1.29198	0.636
41.624	1.1674	0.90667
41.668	1.31848	0.776
41.712	1.14109	1.04308
41.756	1.25715	0.59849
41.8	1.28724	0.79259
41.844	1.20734	0.32279
41.888	1.19489	0.61231
41.932	1.39084	0.55789
41.976	1.29984	1.04308
42.02	1.38633	0.42857
42.064	1.28609	0.96138
42.108	1.54871	0.615
42.152	1.40545	0.51636
42.196	1.36123	0.57333
42.24	1.38655	0.51
42.284	1.32577	0.61379
42.328	1.46281	0.88414
42.372	1.62872	0.49091
42.416	1.59358	0.57067
42.46	1.6509	0.73217
42.504	1.88368	0.6
42.548	1.84924	0.54866
42.592	1.87781	0.49681
42.636	1.79003	0.65333
42.68	1.95272	0.44
42.724	1.90469	0.93412
42.768	2.01083	0.475
42.812	1.88138	0.79
42.856	1.97202	1.04
42.9	1.88978	1.08296
42.944	2.13402	1.168
42.988	2.04946	0.42486
43.032	2.12118	0.67644
43.076	2.25947	0.76242
43.12	2.39615	0.51
43.164	2.47832	0.78462
43.208	2.5333	0.96138
43.252	2.46543	0.90919
43.296	2.70413	0.7
43.34	2.72604	1.112
43.384	2.74157	0.65333
43.428	2.84783	0.73787
43.472	2.85055	0.81935
43.516	3.13655	0.39333
43.56	2.97235	0.67579
43.604	3.23976	0.45806
43.648	3.16854	1.64842
43.692	3.40731	1.04148
43.736	3.34744	0.35289
43.78	3.49658	0.45191
43.824	3.49965	0.66703
43.868	3.75364	0.54723
43.912	3.68635	0.53739
43.956	3.85003	0.58
44	3.99011	0.85391
44.044	4.07215	0.82621
44.088	4.21526	0.88333
44.132	4.46692	1.62222
44.176	4.34865	0.31228
44.22	4.54409	0.328
44.264	4.77981	0.72
44.308	4.88889	0.776
44.352	4.99305	0.5437
44.396	5.0805	-0.04
44.44	5.38791	0.72
44.484	5.54312	0.49793
44.528	5.87127	0.36533
44.572	5.97498	0.67692
44.616	6.08748	0.62667
44.66	6.22133	0.58
44.704	6.50473	0.38105
44.748	6.60699	0.44
44.792	6.78198	0.23137
44.836	7.07377	0.1827
44.88	7.27308	0.2384
44.924	7.53097	0.14667
44.968	8.00378	1.04
45.012	8.05352	0.48148
45.056	8.30744	0.33231
45.1	8.60552	0.03628
45.144	8.85791	0.31273
45.188	9.27723	0.2707
45.232	9.54559	0.18154
45.276	9.87172	0.244
45.32	10.207	0.17217
45.364	10.5162	0.1488
45.408	10.8229	0.11579
45.452	11.1266	0.35158
45.496	11.3811	-0.12
45.54	11.9392	-0.01581
45.584	12.1445	0.05818
45.628	12.622	0.25333
45.672	12.911	-0.12
45.716	13.4722	0.22462
45.76	13.9011	0.27529
45.804	14.4277	-0.232
45.848	14.6571	0.24235
45.892	15.2947	0.5072
45.936	15.6824	0.12
45.98	16.4751	0.04593
46.024	16.5517	-0.08
46.068	16.5665	0.14133
46.112	17.2555	0.328
46.156	17.8514	0.05231
46.2	18.3085	-0.12
46.244	18.8215	-0.07333
46.288	19.6482	-0.01662
46.332	20.1746	-0.03273
46.376	20.7964	0.06954
46.42	21.6534	-0.04
46.464	22.3295	-0.08889
46.508	-0.16129	0.09677
46.552	-0.1049	-0.09333
46.596	-0.00411	0.02452
46.64	-0.29182	-0.03704
46.684	-0.11877	-0.155
46.728	-0.18995	-0.07692
46.772	-0.06464	0.14353
46.816	-0.2494	0.01176
46.86	-0.22541	0.19111
46.904	-0.07909	-0.04774
46.948	-0.21157	-0.05212
46.992	-0.07962	-0.05778
47.036	-0.06346	-0.24
47.08	-0.04529	-0.02919
47.124	-0.28835	0.008
47.168	0.02537	0.08837
47.212	-0.24248	-0.00513
47.256	-0.15339	0.06667
47.3	-0.12459	0.17867
47.344	-0.10698	0.09677
47.388	0.13383	0.125
47.432	-0.18407	-0.07692
47.476	-0.04747	0.19111
47.52	-0.0909	0.14353
47.564	-0.08363	0.11172
47.608	-0.01804	-0.06537
47.652	-0.10906	-0.00333
47.696	0.00288	0.16
47.74	-0.18576	0.0592
47.784	0.02187	0.02
47.828	-0.17819	0.072
47.872	-0.1038	-0.25176
47.916	0.01063	0.11172
47.96	-0.05378	-0.008
48.004	-0.09299	-0.0304
48.048	-0.06497	0.02
48.092	-0.06597	0.27529
48.136	-0.08724	0.16
48.18	-0.05005	-0.00211
48.224	-0.09572	0.264
48.268	-0.08537	0.03556
48.312	-0.0186	0.23368
48.356	-0.09744	0.02933
48.4	-0.36973	0.4176
48.444	-0.11897	-0.06909
48.488	-0.10339	0.12
48.532	-0.10942	-0.02261
48.576	-0.03283	-0.08
48.62	-0.06197	0.10974
48.664	-0.04002	-0.02919
48.708	-0.13726	-0.008
48.752	-0.1836	0.072
48.796	-0.09646	0.4176
48.84	-0.26143	-0.18222
48.884	-0.1355	-0.01073
48.928	-0.17223	-0.15294
48.972	-0.1046	0.05231
49.016	-0.05227	-0.12
49.06	-0.01874	-0.36889
49.104	-0.15635	0.09333
49.148	0.00974	0.09913
49.192	-0.05211	0.27529
49.236	0.10691	-0.36
49.28	-0.03572	0.33818
49.324	-0.01815	0.17867
49.368	-0.1322	0.23368
49.412	-0.09104	0.09778
49.456	-0.0146	0.09
49.5	-0.05362	-0.12
49.544	-0.1129	-0.06909
49.588	-0.14367	0.12889
49.632	-0.12411	0.11442
49.676	-0.06918	0.2
49.72	0.05436	-0.08267
49.764	-0.11222	0.06162
49.808	-0.0347	0.65
49.852	-0.15786	0.26769
49.896	-0.0887	0.23636
49.94	-0.09474	0.00923
49.984	-0.05657	0.02933
50.028	-0.11122	-0.19
50.072	-0.05292	-0.04774
50.116	-0.06205	0.384
50.16	-0.08915	-0.04774
50.204	-0.08368	-0.15294
50.248	-0.12204	0.44
50.292	-0.17351	-0.4
50.336	-0.20163	0.04333
50.38	-0.08846	0.06667
50.424	-0.06289	0.06667
50.468	-0.19589	0.23636
50.512	-0.09111	-0.16667
50.556	-0.21539	-0.08267
50.6	-0.23331	0.33949
50.644	-0.21325	-0.12
50.688	0.0993	0.06667
50.732	-0.10993	0.13455
50.776	-0.20267	0.195
50.82	-0.12632	0.16
50.864	-0.25655	0.14353
50.908	-0.13931	0.055
50.952	-0.25289	0.048
50.996	-0.07044	0.2
51.04	-0.28842	-0.21333
51.084	-0.05286	-0.056
51.128	-0.26624	0.136
51.172	-0.11608	0.03628
51.216	-0.11454	0.09677
51.26	-0.01605	0.22462
51.304	0.00477	-0.12
51.348	-0.02128	0.02
51.392	-0.14999	-0.19
51.436	0.03684	0.23368
51.48	-0.28891	-0.12
51.524	-0.16619	0.12889
51.568	-0.22999	0.12348
51.612	-0.18793	-0.29231
51.656	0.04877	-0.12
51.7	-0.12222	-0.03704
51.744	-0.06178	0.19111
51.788	-0.03023	0.008
51.832	-0.10815	0.06286
51.876	0.07639	0.21185
51.92	-0.00832	-0.18222
51.964	-0.1586	0.26621
52.008	-0.05981	-0.23789
52.052	0.06165	0.272
52.096	-0.04525	-0.14947
52.14	-0.29786	0.14353
52.184	-0.03425	-0.31478
52.228	-0.30959	-0.04
52.272	-0.24418	0.16
52.316	-0.14655	0.11172
52.36	-0.02796	-0.2
52.404	-0.09762	-0.26933
52.448	-0.12374	-0.12
52.492	-0.14408	0.3
52.536	0.0502	-0.12
52.58	-0.08151	-0.12
52.624	-0.1608	0.01176
52.668	-0.13597	-0.07692
52.712	0.00423	0.24235
52.756	0.01759	0.13455
52.8	-0.07988	-0.29231
52.844	-0.2668	0.20421
52.888	-0.1716	0.14353
52.932	-0.09966	0.34667
52.976	-0.09046	0.31355
53.02	-0.12059	0.38909
53.064	-0.19693	0.136
53.108	-0.08073	-0.204
53.152	0.03643	0.01622
53.196	-0.05806	-1.016
53.24	-0.12672	0.72
53.284	-0.03678	-0.36
53.328	-0.02974	0.01576
53.372	0.19234	0.02933
53.416	0.089	-0.36889
53.46	-0.07503	0.09
53.504	-0.05183	0.03628
53.548	0.01119	0.51
53.592	-0.31054	0.02452
53.636	-0.08934	0.11333
53.68	-0.06227	-0.12
53.724	-0.07756	-0.05538
53.768	-0.16731	0.02
53.812	-0.02372	0.23
53.856	0.0933	-0.07333
53.9	-0.04072	-0.2096
53.944	0.04314	0.44
53.988	-0.10924	-0.02044
54.032	0.09961	-0.12
54.076	0.06581	0.19111
54.12	-0.06861	-0.06256
54.164	-0.13295	0.072
54.208	-0.25198	-0.68
54.252	-0.07441	-0.05
54.296	-0.04651	-0.18222
54.34	-0.02443	0.27529
54.384	-0.15054	0.35385
54.428	-0.08657	-0.0528
54.472	-0.18385	-0.02468
54.516	-0.09797	0.01176
54.56	-0.0884	0.2
54.604	-0.06767	-0.09053
54.648	-0.06331	0.14133
54.692	-0.03714	-0.12
54.736	-0.29389	0.09778
54.78	-0.2109	0.13455
54.824	-0.27952	-0.68
54.868	-0.11412	0.28727
54.912	-0.23428	0.58
54.956	-0.00791	0.46947
55	-0.06154	0.16
55.044	-0.2871	-1.016
55.088	0.02045	-1.52
55.132	-0.20357	0.14353
55.176	-0.0841	0.87556
55.22	-0.28985	0.16
55.264	-0.01017	0.37778
55.308	0.03201	0.328
55.352	-0.05064	0.44
55.396	0.06708	1.672
55.44	-0.05857	0.53333
55.484	-0.15299	0.34667
55.528	-0.03537	-1.016
55.572	-0.0313	--
55.616	-0.09373	0.44
55.66	-0.18685	-0.568
55.704	-0.05995	-0.12
55.748	0.07399	0.62667
55.792	-0.06624	-2.36
55.836	0.06846	0.39692
55.88	0.00353	-0.12
55.924	-0.07563	-0.12
55.968	-0.06385	0.12889
56.012	-0.07036	0.28
56.056	-0.06864	-1.24
56.1	-0.15496	0.776
56.144	-0.10012	1.37333
56.188	-0.08984	-0.12
56.232	-0.17697	-0.68
56.276	-0.23462	-1.464
56.32	-0.25894	-0.4
56.364	-0.24806	-0.568
56.408	-0.00985	-2.92
56.452	-0.10457	0.6
56.496	0.03036	0.3
56.54	-0.08408	1
56.584	-0.14546	0.2
56.628	-0.17878	0.62667
56.672	-0.01471	-9.08
56.716	-0.01049	0.11333
56.76	-0.01282	0.12889
56.804	-0.09538	0.776
56.848	0.03764	-0.12
56.892	0.04011	--
56.936	-0.07846	-0.12
56.98	-0.04191	0.53333
57.024	0.0148	0.46947
57.068	0.03008	-0.21333
57.112	-0.05291	3.8
57.156	-0.09834	-0.02667
57.2	-0.1154	1.672
57.244	-0.0338	0.12889
57.288	0.04399	--
57.332	-0.12609	11.08
57.376	-0.12576	2.12
57.42	-0.18784	0.17867
57.464	-0.03577	0.06667
57.508	-0.14943	0.41333
57.552	-0.02987	-0.12
57.596	-0.00913	-0.12
57.64	0.04569	0.08364
57.684	0.02287	--
57.728	-0.04256	-4.6
57.772	-0.15928	-0.68
57.816	-0.15384	0.44
57.86	-0.10396	0.44
57.904	-0.17579	-0.568
57.948	0.00209	-0.232
57.992	-0.07363	-0.86667
58.036	-0.02686	2.49333
58.08	-0.05876	-0.86667
58.124	0.00466	0.2
58.168	0.02068	-0.30667
58.212	-0.02185	0.12889
58.256	-0.06918	-0.12
58.3	-0.01476	0.84
58.344	0.04838	-0.68
58.388	-0.13319	1.84
58.432	-0.06487	-1.8
58.476	0.09083	0.776
58.52	0.05208	-0.68
58.564	-0.1383	0.53333
58.608	-0.24166	-0.12
58.652	-0.06502	-0.12
58.696	-0.03591	0.37778
58.74	-0.01958	-0.008
58.784	0.00328	--
58.828	-0.01714	0.44
58.872	-0.14464	0.664
58.916	-0.16798	-0.30667
58.96	-0.23282	-0.12
59.004	-0.17095	-0.68
59.048	-0.09889	-0.568
59.092	-0.15077	-0.26
59.136	-0.11888	0.02
59.18	-0.30077	-0.00211
59.224	-0.07011	0.87556
59.268	0.00719	0.664
59.312	-0.10015	0.3
59.356	-0.0495	1.37333
59.4	-0.2707	-0.568
59.444	-0.06638	--
59.488	0.14985	0.86
59.532	-0.03991	-0.12
59.576	-0.2606	0.58
59.62	-0.05391	-0.26
59.664	-0.21931	4.36
59.708	-0.20296	-0.02667
59.752	-0.09502	0.04
59.796	-0.19313	-2.36
59.84	0.03985	0.02
59.884	0.11731	-0.12
59.928	-0.10888	0.62667
59.972	-0.10902	-0.26
60.016	-0.31683	0.272
60.06	-0.15421	0.69455
60.104	-0.09247	0.44
60.148	0.01075	0.06667
60.192	0.0939	0.328
60.236	-0.07025	--
60.28	-0.02115	0.52
60.324	-0.22646	0.14353
60.368	-0.04558	0.776
60.412	-0.23038	-1.8
60.456	-0.15419	-0.76
60.5	-0.02444	2.68
60.544	-0.21532	0.44
60.588	-0.01463	0.58
60.632	-0.0856	0.22462
60.676	-0.12945	0.01333
60.72	-0.30527	--
60.764	-0.12914	0.664
60.808	-0.14085	-6.84
60.852	-0.19638	0.40706
60.896	-0.13787	3.8
60.94	-0.24775	0.02
60.984	-0.15411	0.328
61.028	-0.00187	-0.96
61.072	-0.0359	-0.568
61.116	-0.11424	-0.12
61.16	-0.18303	0.72
61.204	0.12507	-0.04
61.248	-0.11121	0.216
61.292	0.01421	0.02
61.336	-0.10099	-0.96
61.38	-0.22095	-1.52
61.424	-0.12577	-0.12
61.468	-0.06926	1.28
61.512	0.11135	-2.36
61.556	-0.2003	-0.568
61.6	-0.05796	1.56
61.644	-0.21505	0.12
61.688	-0.26011	0.37778
61.732	-0.09686	-0.12
61.776	-0.13889	-5.16
61.82	-0.12123	6.6
61.864	-0.12448	2.12
61.908	-0.11448	6.6
61.952	-0.13081	-0.86667
61.996	0.00527	-1.05333
62.04	-0.0461	-0.96
62.084	-0.12284	-0.05778
62.128	-0.23931	4.36
62.172	-0.17592	2.12
62.216	-0.21912	--
62.26	0.01803	-0.12
62.304	-0.2677	0.72
62.348	-0.25772	0.08364
62.392	-0.31327	2.12
62.436	-0.08444	-4.6
62.48	-0.12582	0.02
62.524	-0.07087	-1.05333
62.568	-0.000134167	0.06667
62.612	0.09116	0.37778
62.656	-0.0758	1.37333
62.7	-0.06743	1.672
62.744	-0.11659	-1.42667
62.788	-0.06067	1.224
62.832	-0.07984	-0.12
62.876	-0.08802	0.02
62.92	-0.2311	0.62667
62.964	-0.18617	-1.016
63.008	-0.04822	--
63.052	-0.25183	--
63.096	-0.32825	-0.568
63.14	-0.0599	-0.12
63.184	-0.28706	1.56
63.228	-0.23717	-1.61333
63.272	-0.08867	0.44
63.316	-0.06653	0.664
63.36	0.02583	1.56
63.404	-0.07936	-4.6
63.448	-0.19875	-6.84
63.492	-0.09139	0.44
63.536	-0.13164	0.44
63.58	-0.07342	-0.4
63.624	-0.40987	-2.92
63.668	-0.03257	4.36
63.712	-0.25061	0.72
63.756	-0.17141	--
63.8	-0.12405	0.44
63.844	-0.1683	2.68
63.888	-0.07482	-0.76
63.932	0.14613	0.08364
63.976	-0.07844	-4.6
64.02	-0.02933	0.664
64.064	-0.15268	-2.36
64.108	-0.0514	1.28
64.152	-0.14502	2.12
64.196	-0.16576	--
64.24	-0.10929	-0.12
64.284	-0.09192	0.216
64.328	-0.30434	-0.32364
64.372	0.00569	0.12889
64.416	-0.04326	1.28
64.46	-0.03846	0.2
64.504	-0.12716	-2.36
64.548	-0.04178	1.56
64.592	-0.15697	-0.456
64.636	-0.31303	-0.86667
64.68	-0.1042	-0.76
64.724	0.02714	-0.008
64.768	-0.07608	-0.00211
64.812	-0.0604	-0.21333
64.856	-0.07451	-0.12
64.9	-0.09493	0.01576
64.944	-0.09778	-0.12
64.988	0.05458	-0.03704
65.032	-0.08518	-0.015
65.076	-0.15888	-0.02118
65.12	-0.15015	-0.04276
65.164	-0.06635	0.2
65.208	-0.000376667	0.24
65.252	-0.04436	0.24129
65.296	-0.11717	0.26957
65.34	-0.12074	-0.06909
65.384	0.03876	0.14353
65.428	-0.02172	-0.12
65.472	-0.19229	-0.12
65.516	-0.12626	-0.12
65.56	-0.14903	0.16
65.604	-0.16051	-0.08138
65.648	-0.03119	0.02933
65.692	-0.12801	0.072
65.736	-0.05723	-0.25176
65.78	-0.23773	-0.0304
65.824	-0.18998	-0.12
65.868	-0.24804	0.008
65.912	-0.12071	0
65.956	-0.21111	0.09333
66	-0.17735	-0.12
66.044	-0.2239	-0.19
66.088	-0.12303	0.27529
66.132	-0.31049	0.02933
66.176	-0.13472	0.08
66.22	-0.09772	-0.17091
66.264	-0.1231	0.0731
66.308	-0.24414	0.0592
66.352	-0.1164	0.22222
66.396	-0.21427	-0.08267
66.44	-0.19473	-0.04533
66.484	-0.01272	0
66.528	0.033	-0.05412
66.572	0.07349	0.17867
66.616	-0.22321	0.11172
66.66	0.01257	0.21939
66.704	0.01652	-0.18588
66.748	-0.01408	-0.12
66.792	-0.01183	-0.12
66.836	-0.04552	-0.12
66.88	-0.26292	-0.07852
66.924	0.01024	-0.176
66.968	0.04382	0.104
67.012	-0.10275	-0.36
67.056	-0.27446	-0.21333
67.1	0.00879	0.02452
67.144	-0.0128	0.31077
67.188	0.01437	0.02933
67.232	-0.06088	-0.01073
67.276	-0.17127	-0.02857
67.32	-0.04036	0.19111
67.364	-0.05213	0.14526
67.408	-0.1311	0.06667
67.452	-0.09779	-0.05
67.496	-0.17133	0.0439
67.54	-0.07157	0.14353
67.584	-0.20516	0.05684
67.628	-0.04074	0.24
67.672	-0.04934	-0.092
67.716	0.05988	-0.08706
67.76	-0.13033	0.02737
67.804	-0.02674	0.35158
67.848	-0.21099	0.23
67.892	-0.06904	0.02933
67.936	-0.13695	-0.16667
67.98	-0.20245	-0.05778
68.024	0.04488	-0.12
68.068	-0.16466	0.04471
68.112	-0.04144	0.26957
68.156	0.03432	0.09538
68.2	-0.1718	0.1488
68.244	-0.07802	0.048
68.288	-0.21566	-0.12
68.332	0.01203	0
68.376	-0.0432	0.33818
68.42	-0.01106	-0.12
68.464	-0.03387	0.328
68.508	-0.11783	-0.06105
68.552	0.01128	-0.12
68.596	-0.14835	0.12889
68.64	-0.22138	0.12889
68.684	-0.29853	-0.07692
68.728	-0.15264	-0.12
68.772	-0.01438	0.05231
68.816	-0.03694	-0.03704
68.86	0.0483	0.16718
68.904	-0.01185	0.08364
68.948	0.04308	-0.17895
68.992	-0.06468	0.272
69.036	-0.16442	-0.15733
69.08	-0.11966	0.136
69.124	-0.01734	0.01176
69.168	-0.2566	0.136
69.212	-0.14484	-0.07692
69.256	-0.14087	0.08741
69.3	-0.12895	0.25333
69.344	-0.15806	-0.03158
69.388	0.00848	0
69.432	-0.1441	-0.31478
69.476	-0.11124	0.12
69.52	-0.15245	-0.12
69.564	-0.00619	-0.232
69.608	-0.19806	-0.08973
69.652	-0.24433	0.12889
69.696	-0.21119	0.2
69.74	-0.08716	-0.02667
69.784	-0.04241	-0.2
69.828	-0.10732	0.02452
69.872	-0.06689	0.16
69.916	-0.07095	-0.06909
69.96	-0.10435	-0.16
70.004	-0.19852	-0.12
70.048	-0.19128	-0.19
70.092	-0.02305	0.52
70.136	-0.0887	-0.12
70.18	-0.16725	-0.12
70.224	-0.03941	0.01333
70.268	-0.22315	0.12889
70.312	0.02181	-0.04774
70.356	-0.02064	0.26957
70.4	-0.10029	0.08632
70.444	0.03451	-0.30667
70.488	-0.14509	-0.25176
70.532	0.04157	0.188
70.576	-0.17402	-0.58667
70.62	0.2017	0
70.664	-0.0399	0.01659
70.708	-0.05403	0.14133
70.752	-0.05163	-0.26452
70.796	-0.15416	0.23368
70.84	-0.11477	0.09538
70.884	-0.14529	0.16
70.928	-0.15601	-0.036
70.972	-0.23948	-0.015
71.016	-0.1939	0.65
71.06	-0.11948	0.02933
71.104	-0.14351	0.09333
71.148	0.01989	0.14667
71.192	-0.18074	0.62667
71.236	-0.35804	0.23368
71.28	-0.06864	0.06162
71.324	-0.17295	-0.20296
71.368	-0.1648	0.41333
71.412	-0.1684	-0.08706
71.456	0.1127	-0.08889
71.5	-0.17786	0.31556
71.544	-0.17291	0.00923
71.588	-0.01395	-0.12
71.632	-0.11989	-0.07333
71.676	-0.14358	-0.02118
71.72	-0.14362	-0.12
71.764	-0.05424	0.04471
71.808	-0.05966	-0.12
71.852	-0.10531	0.09
71.896	-0.20941	0.02452
71.94	0.03502	-0.32364
71.984	-0.19586	0.11579
72.028	0.02601	-0.04276
72.072	0.02152	-0.4
72.116	-0.09241	-0.30667
72.16	-0.02204	0.12889
72.204	-0.05032	0.0731
72.248	-0.0933	-0.02667
72.292	-0.20425	-0.17091
72.336	-0.30205	0.16
72.38	-0.10771	-0.12
72.424	-0.23902	0.28
72.468	0.1669	0.06065
72.512	-0.06916	0.62667
72.556	-0.00127	0.11059
72.6	-0.05203	0.06667
72.644	-0.06052	0.03273
72.688	-0.02256	0.04593
72.732	0.01068	0.03273
72.776	0.0038	0.02298
72.82	-0.11329	0.03077
72.864	-0.00233	0.01576
72.908	-0.0563	0.04593
72.952	-0.20621	-0.44941
72.996	-0.01422	0.44
73.04	-0.13437	0.14526
73.084	-0.22248	-0.155
73.128	0.06642	-0.12
73.172	-0.25527	-0.18222
73.216	-0.11912	0.20941
73.26	0.02256	-0.008
73.304	-0.10433	0.28
73.348	-0.01731	0.23368
73.392	-0.06095	0.04593
73.436	-0.06822	0.03556
73.48	-0.05129	-0.05778
73.524	-0.06875	0.272
73.568	-0.06041	0.22462
73.612	-0.12641	0.2
73.656	-0.00726	-0.0304
73.7	-0.0149	-0.05212
73.744	-0.09339	0.12889
73.788	-0.0292	-0.015
73.832	0.04277	-0.30667
73.876	-0.08683	-0.064
73.92	-0.02805	0.3
73.964	-0.10558	-0.01333
74.008	-0.17909	0.16
74.052	-0.06318	-0.008
74.096	-0.20911	0.22462
74.14	-0.1783	0.08
74.184	-0.10854	0.10974
74.228	0.11077	-0.41217
74.272	-0.09519	-0.148
74.316	-0.13188	0.12
74.36	-0.15447	0.216
74.404	-0.08199	-0.04774
74.448	-0.19508	-0.30667
74.492	-0.02108	0.03448
74.536	-0.09679	0.09
74.58	0.05081	0.23
74.624	-0.06383	-0.19724
74.668	-0.17153	-0.04696
74.712	0.02546	-0.008
74.756	-0.22895	0.18154
74.8	-0.06821	-0.155
74.844	-0.09709	-0.05
74.888	-0.17054	0.11172
74.932	-0.34058	-0.12
74.976	0.04489	0.51
75.02	-0.01674	-0.04
75.064	-0.09323	0.02452
75.108	-0.04226	-0.19724
75.152	-0.09064	0.08364
75.196	-0.08351	0.06667
75.24	-0.14274	0.244
75.284	-0.03858	0.10974
75.328	-0.00258	0.24
75.372	-0.31084	-0.064
75.416	0.05015	0.03556
75.46	-0.04691	0.0497
75.504	-0.18918	0.02737
75.548	0.03236	0.2
75.592	-0.13047	0
75.636	-0.08979	-0.24444
75.68	-0.27341	-0.12
75.724	-0.06975	-0.344
75.768	-0.10838	0.17867
75.812	-0.11472	0.125
75.856	-0.05885	0.07478
75.9	-0.14167	0.07478
75.944	0.04046	0.17867
75.988	-0.02048	-0.008
76.032	-0.02325	0.11579
76.076	-0.08057	-0.12
76.12	-0.1231	-0.12
76.164	-0.07293	0.09538
76.208	0.06146	-0.12
76.252	-0.24876	-0.05
76.296	-0.00544	0.11059
76.34	-0.04446	-0.04276
76.384	-0.07507	-0.04364
76.428	-0.08413	-0.12
76.472	-0.08796	0.22462
76.516	-0.02806	-0.05778
76.56	-0.14756	0.00108
76.604	-0.10528	0.0144
76.648	-0.16038	-0.01333
76.692	-0.30031	0.03628
76.736	-0.28659	0.26316
76.78	-0.12958	0.14353
76.824	-0.1297	0.11059
76.868	-0.19223	0.12889
76.912	-0.16345	0.16596
76.956	-0.11995	0.0144
77	0.02227	-0.26
77.044	-0.14544	-0.15862
77.088	-0.02067	0.22844
77.132	-0.11057	0.05231
77.176	0.01851	0.16
77.22	-0.12353	0.16
77.264	-0.13533	0.23636
77.308	-0.07789	-0.085
77.352	0.11272	-0.04
77.396	0.01065	0.06667
77.44	-0.35206	-0.12
77.484	-0.02197	0.14353
77.528	-0.04146	-0.16667
77.572	-0.06165	-0.24923
77.616	0.01431	0.125
77.66	-0.11195	0.14353
77.704	-0.03168	0.22667
77.748	-0.17606	0.17867
77.792	-0.16571	0.06667
77.836	-0.00021	0.1488
77.88	-0.21835	0.28
77.924	0.10723	-0.12
77.968	-0.06226	-0.44
78.012	-0.03638	0.01333
78.056	-0.21049	0.12889
78.1	-0.13134	-0.015
78.144	-0.11524	-0.01581
78.188	-0.20138	0.328
78.232	0.01976	-0.08
78.276	-0.23997	0.00444
78.32	-0.06907	0.05231
78.364	-0.13856	-0.05212
78.408	0.02754	0.47111
78.452	-0.12606	0.22667
78.496	0.00068	-0.02118
78.54	-0.04276	-0.06207
78.584	-0.08215	0.048
78.628	-0.06382	0.00679
78.672	-0.04306	0.16
78.716	-0.05576	-0.2096
78.76	-0.05179	-0.05
78.804	-0.06558	0.08364
78.848	-0.1442	-0.152
78.892	-0.2078	0.216
78.936	-0.19495	0.09778
78.98	-0.15015	-0.04696
79.024	0.03177	0.23636
79.068	-0.12208	0.39692
79.112	-0.11137	0.37778
79.156	-0.32726	-0.07692
79.2	-0.1477	0.2
79.244	-0.23323	0.02
79.288	-0.00759	-0.06791
79.332	0.03715	0.27529
79.376	-0.19277	0.17867
79.42	-0.07603	0.10974
79.464	0.11266	0.03273
79.508	-0.04778	-0.05212
79.552	-0.25663	-0.16308
79.596	-0.07523	0.17867
79.64	-0.13919	0.24
79.684	0.04671	0.23636
79.728	0.03828	0.04593
79.772	-0.0626	0.72
79.816	-0.07194	0.17867
79.86	-0.0324	1.56
79.904	-0.23796	-0.568
79.948	-0.18639	0.28
79.992	-0.23603	-0.568
80.036	-0.13415	0.16
80.08	-0.1189	0.2
80.124	-0.0452	0.16
80.168	-0.01651	0.08364
80.212	0.15279	0.37778
80.256	-0.13225	-0.12
80.3	-0.0646	-0.68
80.344	0.01154	0.02
80.388	-0.0539	0.44
80.432	0.05928	0.44
80.476	0.01637	-0.20296
80.52	-0.11881	0.72
80.564	-0.03848	-0.01333
80.608	-0.04366	-0.61778
80.652	0.00347	0.44
80.696	0.0132	0.328
80.74	-0.09045	-0.68
80.784	-0.01517	-0.41867
80.828	-0.19788	-0.12
80.872	-0.08421	0.02
80.916	-0.01486	--
80.96	-0.06745	0.12
81.004	0.06138	-1.464
81.048	0.03463	0.62667
81.092	0.01047	0.12889
81.136	0.06929	-0.12
81.18	0.13626	-0.12
81.224	-0.0801	-0.52727
81.268	-0.06461	-0.96
81.312	-0.11638	-0.26
81.356	-0.25831	0.23
81.4	-0.07851	-4.6
81.444	0.02426	0.86
81.488	-0.11027	-0.96
81.532	-0.05378	-0.4
81.576	-0.25001	-0.568
81.62	-0.17046	-4.6
81.664	-0.27071	0.02933
81.708	-0.105	-0.12
81.752	-0.03201	-0.24444
81.796	-0.15184	0.328
81.84	0.15709	0.3
81.884	0.09621	-0.12
81.928	0.04124	2.12
81.972	-0.1669	-0.4
82.016	-0.08661	-0.12
82.06	0.21219	0.16
82.104	-0.09493	0.62667
82.148	-0.27507	-5.16
82.192	0.04434	1.37333
82.236	-0.10682	--
82.28	-0.19377	-1.8
82.324	0.03785	0.12
82.368	-0.30258	0.39692
82.412	-0.27391	0.52
82.456	-0.15597	0.23
82.5	-0.02487	0.52
82.544	-0.09905	--
82.588	-0.17992	-0.456
82.632	-0.0266	0.62667
82.676	-0.1461	0.04
82.72	-0.1314	0.06667
82.764	-0.22033	-0.008
82.808	-0.21485	0.62667
82.852	-0.12071	-0.30667
82.896	-0.14626	0.216
82.94	-0.10306	-0.12
82.984	0.07653	-0.12
83.028	-0.08864	0.08364
83.072	-0.18279	-0.28
83.116	-0.13226	-0.12
83.16	-0.18506	-0.26
83.204	-0.09651	-0.76
83.248	-0.02181	2.12
83.292	0.1922	-0.82
83.336	-0.0248	-1.52
83.38	-0.02497	0.52
83.424	0.04203	0.888
83.468	-0.30155	0.16
83.512	-0.22566	-2.36
83.556	-0.15812	-0.4
83.6	-0.02875	-0.12
83.644	-0.059	0.58
83.688	-0.01439	0.06667
83.732	-0.06259	0.37778
83.776	-0.21553	-0.12
83.82	-0.02061	0.328
83.864	-0.02611	0.02933
83.908	-0.05695	0.08364
83.952	-0.20492	-0.4
83.996	0.03378	-1.61333
84.04	0.07241	0.776
84.084	-0.01902	1.56
84.128	-0.13201	0.44
84.172	0.11962	-0.568
84.216	-0.06946	--
84.26	-0.08824	-2.36
84.304	-0.03332	0.23636
84.348	-0.05038	-0.86667
84.392	0.02985	-0.568
84.436	-0.1005	0.16
84.48	-0.14957	0.12889
84.524	-0.10729	0.28
84.568	-0.01664	-0.22182
84.612	-0.08688	0.12889
84.656	-0.11424	0.2
84.7	-0.08041	--
84.744	0.04535	-0.86667
84.788	-0.04168	-0.02667
84.832	0.01216	1.37333
84.876	-0.16277	0.44
84.92	-0.01947	-2.36
84.964	-0.08674	-0.12
85.008	0.04362	0.06667
85.052	-0.05672	0.12889
85.096	-0.06738	0.44
85.14	0.03853	-2.36
85.184	-0.09196	-1.8
85.228	-0.01275	0.2
85.272	-0.08862	-0.54
85.316	-0.01818	-0.22667
85.36	-0.07308	-0.12
85.404	-0.10576	-0.12
85.448	0.19372	-0.82
85.492	0.05416	0.44
85.536	-0.13114	0.3
85.58	0.02569	-0.12
85.624	-0.09499	1.28
85.668	-0.15063	0.02
85.712	-0.09459	0.02
85.756	0.00652	2.68
85.8	-0.03211	-0.86667
85.844	-0.08274	0.16
85.888	-0.02847	--
85.932	-0.03836	-0.82
85.976	-0.29106	-0.04
86.02	-0.07345	-0.68
86.064	-0.06444	-0.12
86.108	-0.0114	2.12
86.152	-0.04205	-0.12
86.196	-0.102	-0.008
86.24	-0.08122	-0.68
86.284	0.01481	-0.47368
86.328	-0.13087	-0.68
86.372	-0.06639	0.62667
86.416	-0.13828	--
86.46	-0.06413	-0.12
86.504	-0.15653	0.664
86.548	-0.09704	0.17867
86.592	-0.05941	-0.12
86.636	-0.00472	-0.30667
86.68	-0.06933	0.12889
86.724	-0.07691	1.28
86.768	0.09992	--
86.812	-0.10142	-0.68
86.856	-0.169	-1.1
86.9	0.02719	-1.8
86.944	0.06212	-0.12
86.988	-0.05215	-0.68
87.032	0.06514	0.37
87.076	-0.01724	-1.016
87.12	-0.1409	0.05231
87.164	-0.04546	0.36696
87.208	-0.03243	6.6
87.252	0.09119	0.09
87.296	0.03619	--
87.34	-0.09913	-0.32364
87.384	-0.14172	-0.12
87.428	-0.11396	1.56
87.472	-0.01303	2.68
87.516	-0.07937	0.2
87.56	0.03329	2.12
87.604	-0.23811	-0.4
87.648	0.02315	--
87.692	-0.13587	0.28
87.736	-0.06479	-0.12
87.78	-0.19567	-2.36
87.824	-0.16867	-1.52
87.868	-0.08045	0.14353
87.912	-0.12273	0.44
87.956	-0.05396	-0.4
[truncated: 17 more rows]

## Sheet: Figure 1E
time (s)	force (pN)	FRET efficiency
0.044	0.71658	0.95636
0.088	0.63521	0.84552
0.132	0.80644	0.88141
0.176	0.74982	0.61231
0.22	0.84906	0.92
0.264	0.59164	0.91385
0.308	0.80731	0.79368
0.352	0.77412	0.92364
0.396	0.68269	0.98617
0.44	0.49017	0.86977
0.484	0.84112	0.88414
0.528	0.61471	0.90118
0.572	0.95911	0.90508
0.616	1.10846	0.88211
0.66	0.90397	0.72848
0.704	0.65067	0.72
0.748	0.75359	0.92329
0.792	0.92987	0.916
0.836	0.7876	1.01455
0.88	0.6152	0.80878
0.924	0.8673	0.87556
0.968	0.82587	0.94227
1.012	1.0111	0.85839
1.056	1.1838	0.93891
1.1	1.11543	0.93946
1.144	0.72754	0.86157
1.188	0.93489	0.87556
1.232	1.16945	0.89073
1.276	1.1103	0.93846
1.32	1.01459	0.87556
1.364	0.96886	0.93253
1.408	1.25089	0.97887
1.452	1.08601	0.88141
1.496	0.96093	1
1.54	1.20921	0.84
1.584	1.07772	0.84955
1.628	1.3628	0.80235
1.672	1.46304	1.0448
1.716	1.09694	0.9082
1.76	0.97275	0.66222
1.804	1.20778	1.10182
1.848	1.22612	0.92186
1.892	1.33708	0.93086
1.936	1.28536	0.87148
1.98	1.4102	0.86977
2.024	1.37588	0.9552
2.068	1.46071	0.872
2.112	1.39497	0.90044
2.156	1.56658	0.84
2.2	1.415	0.94831
2.244	1.46897	0.93412
2.288	1.70757	0.86424
2.332	1.62088	0.91158
2.376	1.78309	0.69455
2.42	1.75896	0.96387
2.464	1.76674	0.92911
2.508	1.82216	0.98222
2.552	1.84889	0.84
2.596	1.81998	0.94909
2.64	1.95214	0.87938
2.684	2.09951	0.91111
2.728	1.89873	0.86192
2.772	2.11954	0.84552
2.816	2.04589	1
2.86	2.11724	0.96973
2.904	2.01654	0.85548
2.948	2.24433	0.96706
2.992	2.41273	0.71097
3.036	2.56315	1
3.08	2.39507	0.79
3.124	2.55557	0.93412
3.168	2.65212	0.6722
3.212	2.5566	1.08296
3.256	2.62261	0.70526
3.3	2.58373	0.8069
3.344	2.71779	0.83407
3.388	2.67159	0.832
3.432	2.85196	0.93253
3.476	2.87121	0.69021
3.52	2.86988	0.90667
3.564	3.24746	0.79636
3.608	3.10274	0.88333
3.652	3.28291	0.85803
3.696	3.40943	0.9104
3.74	3.46302	0.8069
3.784	3.66384	0.72966
3.828	3.47583	0.80235
3.872	3.6359	0.965
3.916	3.88601	0.83407
3.96	3.94807	0.75273
4.004	3.64975	0.74154
4.048	4.26736	0.8656
4.092	4.06715	0.1078
4.136	4.62723	0.98222
4.18	4.40521	0.79759
4.224	4.39539	0.75111
4.268	4.52924	0.83475
4.312	4.74095	0.91805
4.356	5.16576	0.70133
4.4	4.94094	1
4.444	5.47451	0.52842
4.488	5.44571	0.17333
4.532	5.53438	0.2371
4.576	5.69056	0.79897
4.62	5.82714	0.83573
4.664	6.08639	0.78386
4.708	6.29179	0.8069
4.752	6.58713	0.72757
4.796	6.60555	0.90214
4.84	6.86067	0.86
4.884	7.15369	0.72966
4.928	7.46978	0.685
4.972	7.46517	0.84372
5.016	7.68918	0.87556
5.06	7.98942	0.86424
5.104	8.26796	0.98466
5.148	8.47912	0.664
5.192	8.69803	0.84
5.236	9.13284	0.82145
5.28	9.37543	-0.00211
5.324	9.43166	0.43233
5.368	9.99701	0.68889
5.412	10.451	0.75652
5.456	10.6741	0.67781
5.5	11.0322	0.74154
5.544	11.2529	0.72
5.588	11.32	0.57236
5.632	11.7414	0.048
5.676	12.3143	0.05013
5.72	12.479	0.06065
5.764	13.1105	0.13239
5.808	13.2938	0.04333
5.852	13.7527	0.15685
5.896	14.1184	-0.07022
5.94	14.5713	0.4937
5.984	14.9389	0.49793
6.028	15.3773	0.12216
6.072	15.9391	0.06667
6.116	16.282	0.10652
6.16	17.0467	0.03273
6.204	17.2486	0.17091
6.248	17.9789	0.22909
6.292	18.4221	0.244
6.336	19.2224	0.05231
6.38	19.7841	0.04471
6.424	19.5826	0.06286
6.468	20.363	0.1264
6.512	20.688	0.09748
6.556	21.3	0.21091
6.6	21.7825	0.05231
6.644	22.9634	0.17333
6.688	22.9255	0.07765
6.732	22.5434	0.168
6.776	21.5697	0.25333
6.82	21.335	0.12289
6.864	20.4822	-0.06966
6.908	19.7462	0.05013
6.952	18.9751	0.31228
6.996	18.4546	0.1488
7.04	18.0835	0.19677
7.084	17.9559	0.06474
7.128	16.9652	0.17867
7.172	16.584	0.22844
7.216	16.3194	-0.00364
7.26	15.5567	0.08571
7.304	15.0443	0.1264
7.348	14.7816	0.1905
7.392	14.214	0.31355
7.436	13.893	0.18049
7.48	13.6306	0.05231
7.524	13.2479	0.02452
7.568	12.3353	0.3
7.612	12.2924	0.11273
7.656	12.1075	0.2186
7.7	11.7201	0.132
7.744	11.3462	0.05231
7.788	10.7687	-0.1593
7.832	10.4459	0.24235
7.876	10.2304	0.12889
7.92	9.84687	0.10857
7.964	9.50428	0.104
8.008	9.43221	0.0806
8.052	8.98025	0.00679
8.096	8.7649	0.21811
8.14	8.67383	0.24235
8.184	8.39147	-0.06537
8.228	8.10907	0.37
8.272	7.90836	0.29674
8.316	7.6602	0.12585
8.36	7.38465	0.26182
8.404	7.04293	0.05231
8.448	6.97648	0.09479
8.492	6.77202	0.4176
8.536	6.60906	0.0806
8.58	6.35759	0.10974
8.624	6.13299	0.20386
8.668	5.9702	0.12289
8.712	5.93353	0.11273
8.756	5.69544	0.04
8.8	5.33591	0.01176
8.844	5.24667	0.12123
8.888	5.19354	0.00923
8.932	5.23563	0.27111
8.976	4.95454	0.05684
9.02	4.59241	0.08364
9.064	4.69248	0.076
9.108	4.62727	0.09
9.152	4.33986	0.15509
9.196	4.26608	-0.08554
9.24	4.07966	-0.12
9.284	3.94742	0.12
9.328	3.71853	-0.06791
9.372	3.75683	0.07649
9.416	3.74786	0.1809
9.46	3.61125	0.32
9.504	3.65156	-0.03805
9.548	3.48979	0.104
9.592	3.52547	0.18745
9.636	3.19086	0.195
9.68	3.25965	0.272
9.724	3.25513	0.195
9.768	2.9345	0.09
9.812	2.99431	0.00218
9.856	2.62983	0.03448
9.9	2.64134	0.06162
9.944	2.76089	0.09333
9.988	2.48037	0.12436
10.032	2.64933	0.33714
10.076	2.50024	0.10684
10.12	2.49693	0.11059
10.164	2.30619	0.18545
10.208	2.49191	0.92911
10.252	2.55173	0.92774
10.296	2.29394	0.87299
10.34	2.29264	0.89333
10.384	2.16395	0.825
10.428	2.19471	0.81515
10.472	2.2256	0.91642
10.516	2.04938	0.80444
10.56	1.8489	0.92276
10.604	1.88941	1.02605
10.648	2.04846	0.89161
10.692	1.87053	0.87892
10.736	1.77765	0.88958
10.78	1.94088	0.8069
10.824	1.70789	0.91884
10.868	1.58956	1.05695
10.912	1.66728	1.02872
10.956	1.48809	0.88513
11	1.67621	0.86246
11.044	1.50625	0.90261
11.088	1.82957	0.9082
11.132	1.47849	0.97395
11.176	1.59159	0.90919
11.22	1.48525	0.78811
11.264	1.52176	0.94985
11.308	1.34138	0.90261
11.352	1.6508	0.90919
11.396	1.35507	0.79119
11.44	1.26542	0.95333
11.484	1.40679	0.776
11.528	1.22822	0.89333
11.572	1.18767	0.90118
11.616	1.19808	0.93
11.66	1.36636	0.904
11.704	1.3418	0.98164
11.748	1.28043	0.93212
11.792	1.34176	0.72406
11.836	1.1182	1
11.88	1.23865	0.82648
11.924	1.30306	0.944
11.968	1.16945	0.88674
12.012	0.87881	0.87556
12.056	1.0919	0.93253
12.1	1.16454	0.94831
12.144	0.75337	0.82458
12.188	0.97806	0.71525
12.232	0.99761	0.87556
12.276	1.03408	0.91111
12.32	0.79826	0.90508
12.364	0.84396	0.96138
12.408	0.96629	0.71663
12.452	0.87858	1.03733
12.496	0.90246	0.82316
12.54	0.97719	0.95747
12.584	0.85288	1.01965
12.628	0.55921	0.8303
12.672	0.83103	0.94256
12.716	0.8172	0.89818
12.76	0.83327	0.65
12.804	0.95096	0.81091
12.848	0.86772	0.80587
12.892	0.74484	0.87556
12.936	0.7697	0.82769
12.98	0.55352	0.78899
13.024	0.74743	0.70133
13.068	0.63266	0.94985
13.112	0.64619	0.93708
13.156	0.58206	0.972
13.2	0.74775	0.80444
13.244	0.73998	0.96706
13.288	0.72748	0.85702
13.332	0.64163	0.8
13.376	0.86804	0.89161
13.42	0.75254	0.95692
13.464	0.60181	0.92186
13.508	0.58069	0.73867
13.552	0.64917	0.95692
13.596	0.86888	0.776
13.64	0.48128	0.75111
13.684	0.75005	0.92364
13.728	0.77651	0.97964
13.772	0.5833	0.93778
13.816	0.64338	0.89547
13.86	0.83039	0.95636
13.904	0.7906	0.97053
13.948	0.68654	0.98164
13.992	0.51978	0.81046
14.036	0.86059	0.73918
14.08	1.00357	0.77143
14.124	0.92475	0.8499
14.168	0.94954	0.98466
14.212	0.81217	1
14.256	0.91706	0.84955
14.3	0.99286	0.94909
14.344	0.98844	0.87826
14.388	0.83329	0.8479
14.432	1.15472	1.08889
14.476	0.95562	0.90044
14.52	1.01628	0.82316
14.564	0.68179	0.93778
14.608	1.07418	0.68348
14.652	1.26179	0.96387
14.696	1.15691	0.89818
14.74	1.28654	0.94831
14.784	1.06961	0.81333
14.828	0.91951	0.85506
14.872	1.19855	0.70526
14.916	1.21646	0.86
14.96	1.29757	0.89818
15.004	1.15312	0.86824
15.048	1.25378	0.84865
15.092	1.39548	0.93946
15.136	1.475	0.66703
15.18	1.06249	0.872
15.224	1.22217	0.87938
15.268	1.27668	0.83529
15.312	1.64951	0.965
15.356	1.36335	0.98507
15.4	1.50205	0.92851
15.444	1.49702	0.90776
15.488	1.50774	0.90175
15.532	1.44174	0.93946
15.576	1.81122	0.804
15.62	1.84777	0.92
15.664	1.68915	0.93412
15.708	1.64535	0.88141
15.752	1.96202	0.87077
15.796	1.98812	0.79803
15.84	1.82125	0.96138
15.884	1.93548	0.96606
15.928	2.09084	0.78607
15.972	1.83127	0.85263
16.016	2.02084	0.92
16.06	1.90519	1
16.104	1.96284	0.87938
16.148	2.14866	0.944
16.192	2.16654	0.82648
16.236	2.08107	0.80878
16.28	2.28462	1.03862
16.324	2.1576	0.75111
16.368	2.16885	0.97053
16.412	2.35735	0.91884
16.456	2.42492	1.05169
16.5	2.49353	0.95268
16.544	2.58543	0.81673
16.588	2.8899	1
16.632	2.66532	0.85506
16.676	2.60716	0.82316
16.72	3.20128	0.84372
16.764	2.93556	0.76828
16.808	2.81812	0.79429
16.852	2.93953	0.82431
16.896	3.19042	0.90175
16.94	3.22157	0.776
16.984	3.34166	0.72301
17.028	3.20234	0.90175
17.072	3.46404	0.9366
17.116	3.55495	0.78269
17.16	3.6456	0.5777
17.204	3.90337	0.78899
17.248	4.01123	0.76941
17.292	4.01708	0.98328
17.336	4.18903	1.03027
17.38	4.3623	0.02
17.424	4.45081	-0.17744
17.468	4.24394	0.34222
17.512	4.74682	0.65913
17.556	4.7902	0.552
17.6	4.79127	0.18049
17.644	5.06505	0.62667
17.688	5.02853	0.89161
17.732	5.20559	0.88299
17.776	5.49682	1.05333
17.82	5.58179	0.76421
17.864	6.21743	0.78386
17.908	5.98332	0.82316
17.952	6.24769	0.08364
17.996	6.35282	0.96973
18.04	6.66999	0.776
18.084	6.64395	0.76131
18.128	6.87449	0.93143
18.172	7.0621	0.48179
18.216	7.25056	0.72622
18.26	7.59546	1
18.304	7.79556	0.70963
18.348	7.9075	0.58275
18.392	8.30261	0.80522
18.436	8.56964	0.03719
18.48	8.84732	0.85067
18.524	9.08814	0.75784
18.568	9.21661	0.6
18.612	9.67656	-0.1593
18.656	10.0097	0.02
18.7	10.0106	0.02
18.744	10.4629	0.12889
18.788	10.8281	0.21297
18.832	11.1847	0.19256
18.876	11.7553	0.12216
18.92	11.9894	0.22025
18.964	12.4487	0.24861
19.008	12.6479	0.195
19.052	13.0913	0.22667
19.096	13.2331	0.30442
19.14	13.814	0.05231
19.184	14.2655	0.33714
19.228	14.7165	0.09333
19.272	15.0275	0.13519
19.316	15.442	0.17091
19.36	16.0917	0.17585
19.404	16.4726	0.14133
19.448	16.7909	0.63535
19.492	17.2965	0.54769
19.536	18.2726	0.44
19.58	18.3288	0.28444
19.624	18.3731	0.1959
19.668	19.1079	0.16832
19.712	19.6943	0.30139
19.756	19.9208	0.20356
19.8	21.0084	-0.03805
19.844	21.4253	0.18545
19.888	22.6077	0.29067
19.932	22.6453	-0.01333
19.976	22.9723	0.21471
20.02	22.2788	0.17867
20.064	21.9255	0.00218
20.108	21.4209	0.12615
20.152	20.8847	0.08364
20.196	19.9821	0.22759
20.24	18.9757	-0.06791
20.284	18.8925	0.08741
20.328	18.5054	0.13358
20.372	17.6153	0.27529
20.416	17.1368	-0.03216
20.46	16.9347	0.28119
20.504	16.5639	0.35515
20.548	15.8965	0.15429
20.592	15.3704	0.13519
20.636	14.7913	0.07478
20.68	14.3316	0.06667
20.724	13.9718	-0.01161
20.768	13.4136	0.16
20.812	13.1459	0.24324
20.856	12.7513	0.2
20.9	12.3005	0.37778
20.944	12.0114	0.08364
20.988	11.694	0.104
21.032	11.2471	-0.04276
21.076	11.1562	0.22222
21.12	10.7202	0.30959
21.164	10.4187	0.10857
21.208	10.0037	0.09677
21.252	9.65057	0.1809
21.296	9.59573	0.19015
21.34	9.20725	0.14576
21.384	8.94959	0.24776
21.428	8.753	0.08571
21.472	8.50275	0.36533
21.516	8.07024	0.29763
21.56	7.71944	0.11579
21.604	7.50336	0.3582
21.648	7.51232	0.17867
21.692	7.15565	0.12889
21.736	6.91086	0.32066
21.78	6.86193	0.06361
21.824	6.63302	0.06411
21.868	6.51568	0.1809
21.912	6.07305	0.08677
21.956	5.8334	0.18745
22	5.78827	0.25333
22.044	5.51845	0.21495
22.088	5.35062	0.13705
22.132	5.37116	0.136
22.176	5.24936	0.06447
22.22	5.15623	0.14353
22.264	4.87918	0.16903
22.308	4.83924	0.35515
22.352	4.65627	0.1183
22.396	4.43017	0.03135
22.44	4.27033	0.29143
22.484	4.22046	0.0439
22.528	4.03666	0.06065
22.572	3.95439	0.0497
22.616	3.94691	0.03448
22.66	3.779	0.05231
22.704	3.70641	0.28393
22.748	3.78076	0.29143
22.792	3.40436	0.16988
22.836	3.47182	0.24923
22.88	3.3431	0.17867
22.924	3.17367	0.27529
22.968	2.98726	0.13455
23.012	2.90468	0.168
23.056	2.99418	0.16
23.1	2.82868	0.09677
23.144	2.9423	0.195
23.188	2.64948	0.14667
23.232	2.75655	0.14667
23.276	2.52678	0.09333
23.32	2.52689	0.21939
23.364	2.46182	0.04593
23.408	2.61947	0.17377
23.452	2.55505	0.11758
23.496	2.3429	0.21471
23.54	2.13576	0.12615
23.584	2.12758	0.328
23.628	2.24083	0.07649
23.672	2.18698	0.12889
23.716	2.14173	0.24129
23.76	1.814	0.04471
23.804	1.99348	0.1329
23.848	1.8562	-0.0807
23.892	2.02964	0.136
23.936	1.71698	0.1488
23.98	1.52894	0.34345
24.024	1.85084	0.29763
24.068	1.92453	0.0592
24.112	1.79605	0.04232
24.156	1.60321	0.2
24.2	1.70772	0.232
24.244	1.48699	0.16596
24.288	1.62809	0.10085
24.332	1.51784	0.43309
24.376	1.39511	0.16
24.42	1.40372	0.11758
24.464	1.58181	-0.12
24.508	1.38985	0.13239
24.552	1.56311	0.17377
24.596	1.56309	0.05231
24.64	1.32408	0.25333
24.684	1.4297	-0.02667
24.728	1.26646	0.19111
24.772	1.40048	0.30203
24.816	1.10167	0.10857
24.86	1.19588	0.19111
24.904	1.07337	0.21471
24.948	1.29906	0.29481
24.992	1.13628	0.11579
25.036	0.95817	0.16
25.08	0.99834	0.68302
25.124	1.06036	0.73183
25.168	0.97659	0.55721
25.212	0.97326	0.54182
25.256	1.2341	0.57689
25.3	0.94168	0.78667
25.344	0.95334	0.74857
25.388	0.76892	0.81091
25.432	1.22359	0.69455
25.476	1.10269	0.58209
25.52	0.91098	0.6864
25.564	0.98771	0.76
25.608	1.16596	0.75652
25.652	0.90252	0.89161
25.696	1.04754	0.82648
25.74	0.97468	0.76421
25.784	1.14581	0.59273
25.828	1.02366	0.75784
25.872	0.94429	0.60471
25.916	0.79044	0.86712
25.96	0.87275	0.68
26.004	0.88951	0.84865
26.048	0.80077	0.615
26.092	0.77832	0.74857
26.136	0.98093	0.776
26.18	0.67206	0.73333
26.224	0.85816	0.87273
26.268	0.69798	0.71282
26.312	0.23803	0.6864
26.356	0.71556	0.86
26.4	0.73633	0.88414
26.444	0.72297	0.48308
26.488	0.91178	0.72757
26.532	0.61342	0.88571
26.576	0.69393	0.72459
26.62	0.88473	0.88085
26.664	0.5038	0.692
26.708	0.39083	0.8069
26.752	0.64359	0.76889
26.796	0.58778	0.79636
26.84	0.71237	0.62667
26.884	0.75674	0.69159
26.928	0.70215	0.66222
26.972	0.78417	0.73918
27.016	0.68887	0.67333
27.06	0.91453	0.51304
27.104	0.93584	0.56571
27.148	0.61411	0.50222
27.192	0.79485	0.65
27.236	0.77212	0.71349
27.28	0.97394	0.78811
27.324	1.03839	0.79368
27.368	0.85848	0.73527
27.412	1.04522	0.76242
27.456	1.06071	0.80444
27.5	0.96034	0.692
27.544	0.86731	0.84552
27.588	0.99289	0.84405
27.632	0.9865	0.81046
27.676	0.98806	0.67484
27.72	1.02906	0.53333
27.764	1.19667	0.71525
27.808	0.91551	0.62667
27.852	0.8368	0.80055
27.896	1.12673	0.72
27.94	1.15029	0.68964
27.984	1.1276	0.65115
28.028	1.17495	0.64
28.072	1.12526	0.76941
28.116	1.34027	0.776
28.16	1.35895	0.64896
28.204	1.22144	0.9082
28.248	1.20667	0.776
28.292	1.42904	0.58737
28.336	1.10764	0.62667
28.38	1.4272	0.5968
28.424	1.0978	0.72364
28.468	1.39389	0.79759
28.512	1.28968	0.76242
28.556	0.99893	0.58575
28.6	1.56234	0.72406
28.644	1.35779	0.58737
28.688	1.47984	0.7609
28.732	1.50204	0.76421
28.776	1.72912	0.62667
28.82	1.53967	0.82648
28.864	1.8761	0.64
28.908	1.55621	0.7471
28.952	1.7059	0.67816
28.996	1.85049	0.72
29.04	1.67575	0.72459
29.084	1.78273	0.81333
29.128	1.3914	0.78269
29.172	2.17539	0.552
29.216	2.03231	0.66703
29.26	1.86539	0.65115
29.304	2.0331	0.62667
29.348	2.27765	0.89161
29.392	1.98837	0.69021
29.436	2.10016	0.5968
29.48	1.82884	0.615
29.524	2.4367	0.70526
29.568	2.15387	0.84
29.612	2.44056	0.74857
29.656	2.44683	0.67579
29.7	2.52427	0.73333
29.744	2.47923	0.70353
29.788	2.69264	0.72
29.832	2.56247	0.58
29.876	2.65177	0.53655
29.92	2.55013	0.72966
29.964	2.85338	0.73333
30.008	3.06933	0.776
30.052	3.05281	0.65714
30.096	3.07215	0.62667
30.14	2.96277	0.84492
30.184	3.2186	0.70963
30.228	3.2046	0.65538
30.272	3.40545	0.664
30.316	3.41637	0.85391
30.36	3.57913	0.91385
30.404	3.69699	0.78386
30.448	3.65726	0.70526
30.492	3.87405	0.78553
30.536	3.93822	0.8926
30.58	3.92945	0.692
30.624	4.20876	0.78899
30.668	4.25874	0.72
30.712	4.1786	0.68
30.756	4.45531	0.79803
30.8	4.59259	0.69455
30.844	4.79993	0.62667
30.888	4.88677	0.73787
30.932	4.99703	0.67729
30.976	5.09911	0.59849
31.02	5.36767	0.75415
31.064	5.52358	0.79259
31.108	5.50036	0.87938
31.152	5.99621	0.79636
31.196	5.90636	0.78182
31.24	6.11338	0.70353
31.284	6.38191	0.88571
31.328	6.55369	0.4717
31.372	6.70418	0.5072
31.416	7.02879	0.86712
31.46	7.22763	0.70526
31.504	7.2367	0.68744
31.548	7.44339	0.68302
31.592	7.66825	0.66222
31.636	7.94858	0.90667
31.68	8.37463	0.73918
31.724	8.46434	0.84552
31.768	8.87793	0.75652
31.812	9.18339	0.74925
31.856	9.49857	0.38909
31.9	9.75821	0.72
31.944	9.97681	0.776
31.988	10.1773	0.76242
32.032	10.468	0.74456
32.076	10.655	0.53882
32.12	11.2705	0.61644
32.164	11.6466	0.776
32.208	11.7029	0.7617
32.252	12.3725	0.59024
32.296	12.5451	0.65538
32.34	13.0875	0.67333
32.384	13.4611	0.76941
32.428	13.9187	0.60258
32.472	14.4309	0.69103
32.516	14.6619	0.84552
32.56	15.0189	0.69951
32.604	15.5913	0.74857
32.648	16.0985	0.86977
32.692	16.5133	0.71525
32.736	16.7395	0.76
32.78	17.2044	0.216
32.824	17.8958	0.50512
32.868	18.2323	0.79119
32.912	18.9364	0.88414
32.956	19.6814	0.87556
33	20.4889	0.73333
33.044	20.94	0.72
33.088	21.0925	0.0731
33.132	21.3267	0.23636
33.176	21.9233	0.22087
33.22	23.2477	0.2
33.264	23.4153	-0.16148
33.308	22.7573	0.15034
33.352	21.9352	0.07064
33.396	21.4821	0.18685
33.44	20.5437	0.28976
33.484	20.0654	-0.0414
33.528	19.6111	0.29067
33.572	18.7946	0.18745
33.616	18.3336	0.0592
33.66	17.7099	-0.00938
33.704	17.418	0.24465
33.748	16.7259	0.04593
33.792	16.1547	0.44836
33.836	15.3919	0.01176
33.88	15.1354	0.13971
33.924	15.0727	0.0497
33.968	14.1767	0.01714
34.012	14.0305	0.05778
34.056	13.5687	-0.12
34.1	13.1876	0.25333
34.144	12.7423	0.41333
34.188	12.2821	0.09677
34.232	12.213	-0.0807
34.276	11.3645	0.1827
34.32	11.4224	0.09538
34.364	11.1084	-0.30667
34.408	10.6852	-0.06729
34.452	10.2071	0.02933
34.496	10.1787	0.37455
34.54	9.83716	0.12889
34.584	9.29066	0.27046
34.628	9.14432	0.01714
34.672	9.11905	0.17867
34.716	8.49803	0.3177
34.76	8.43682	0.07765
34.804	8.19205	-0.04276
34.848	8.00734	0.1329
34.892	7.77723	0.1959
34.936	7.26186	0.1488
34.98	7.39649	0.11579
35.024	7.07812	0.08837
35.068	7.06319	0.2
35.112	6.48223	0.16718
35.156	6.44412	0.16509
35.2	6.19129	0.39692
35.244	5.99731	0.33714
35.288	5.77539	0.02452
35.332	5.6989	-0.12
35.376	5.65274	0.08364
35.42	5.42139	0.16
35.464	5.39718	0.13705
35.508	5.04254	0.17037
35.552	4.91966	0.2371
35.596	4.83623	0.09333
35.64	4.71327	0.06667
35.684	4.46782	0.104
35.728	4.30281	0.20421
35.772	4.14774	-0.08
35.816	4.11743	0.11579
35.86	4.12586	0.1078
35.904	4.06523	0.08
35.948	4.06608	0.26038
35.992	3.74992	-0.12
36.036	3.43953	0.31077
36.08	3.59965	-0.02044
36.124	3.45663	0.168
36.168	3.19573	0.32211
36.212	3.28257	0.136
36.256	3.09873	0.09538
36.3	2.8964	0.0592
36.344	2.66128	0.09333
36.388	2.93955	0.11758
36.432	2.84277	0.27529
36.476	2.69222	0.17377
36.52	2.77635	0.21433
36.564	2.67737	-0.02667
36.608	2.77127	0.08
36.652	2.47318	0.3388
36.696	2.40145	0.1488
36.74	2.38099	0.12436
36.784	2.48603	0.15616
36.828	2.4186	0.12123
36.872	2.1657	0.11579
36.916	2.15465	0.18897
36.96	2.39497	0.1329
37.004	2.25409	0.61309
37.048	2.27539	1.03613
37.092	2.04418	1
37.136	2.04735	1
37.18	1.98604	1.01672
37.224	2.03612	1.0487
37.268	1.85897	0.83407
37.312	1.99665	0.79493
37.356	1.96977	0.9552
37.4	1.96008	0.91111
37.444	1.7947	0.7609
37.488	1.65684	0.776
37.532	1.81774	0.80055
37.576	1.63593	0.91704
37.62	1.50029	0.97333
37.664	1.65418	0.97617
37.708	1.54319	0.93
37.752	1.32059	0.91884
37.796	1.50002	0.91385
37.84	1.4571	0.67059
37.884	1.32607	0.92
37.928	1.55406	0.90667
37.972	1.65152	0.79368
38.016	1.37554	0.93
38.06	1.51406	0.89818
38.104	1.41841	0.825
38.148	1.47468	1.02605
38.192	1.35998	0.9513
38.236	1.25251	0.96606
38.28	1.30024	0.90118
38.324	1.08348	0.91385
38.368	1.13059	0.72406
38.412	1.30994	0.87148
38.456	1.14272	0.83475
38.5	1.11612	0.83319
38.544	1.1108	0.82431
38.588	1.18766	0.96973
38.632	1.05211	0.91385
38.676	1.12424	0.95747
38.72	0.82056	0.95852
38.764	1.0888	0.91385
38.808	1.29978	0.83094
38.852	1.08417	0.79119
38.896	0.94033	0.82182
38.94	1.00254	1.02489
38.984	0.87014	0.94256
39.028	0.73775	0.825
39.072	1.09165	0.96267
39.116	0.45555	1.01898
39.16	0.72151	0.79636
39.204	0.88573	0.91385
39.248	0.98232	0.86753
39.292	0.96022	0.62667
39.336	0.93219	0.692
39.38	0.98794	0.71692
39.424	0.74444	0.80981
39.468	0.8271	0.85157
39.512	0.84294	0.84955
39.556	0.65797	0.71692
39.6	0.62492	0.69694
39.644	0.75358	0.63636
39.688	0.64861	0.77967
39.732	0.59412	0.73037
39.776	0.73656	0.70286
39.82	0.60365	0.75899
39.864	0.70663	0.79493
39.908	0.65797	0.85803
39.952	0.40104	0.86667
39.996	0.77291	0.84492
40.04	0.6563	0.664
40.084	0.54807	0.86667
40.128	0.57441	0.93978
40.172	0.68739	0.86424
40.216	0.75293	0.84955
40.26	0.65737	0.63718
40.304	0.80141	0.85157
40.348	0.89587	0.79636
40.392	0.68936	0.82458
40.436	0.70989	0.74545
40.48	0.87239	0.88
40.524	0.5716	0.8157
40.568	0.92564	0.67484
40.612	0.80034	0.80235
40.656	0.8191	0.78146
40.7	0.9719	0.888
40.744	0.75206	0.79759
40.788	0.9571	0.90667
40.832	1.20597	0.75784
40.876	1.17018	0.75652
40.92	0.66726	0.61231
40.964	0.98309	0.61897
41.008	1.01329	0.73728
41.052	1.10773	0.94492
41.096	1.29558	1
41.14	1.11444	0.87148
41.184	0.96689	0.78607
41.228	1.01115	0.69951
41.272	1.0328	0.80444
41.316	0.99527	0.76558
41.36	1.36313	0.84
41.404	1.12553	0.92533
41.448	1.29143	0.90508
41.492	1.30471	0.9552
41.536	0.92557	0.70526
41.58	0.96393	0.692
41.624	1.41065	1
41.668	1.40787	0.87938
41.712	1.28738	0.85391
41.756	1.42347	0.83475
41.8	1.58867	0.82578
41.844	1.46058	0.79368
41.888	1.31927	0.87148
41.932	1.45691	0.85391
41.976	1.17899	0.79897
42.02	1.35268	0.79636
42.064	1.65239	0.78323
42.108	1.55279	0.84955
42.152	1.83105	0.88958
42.196	1.55719	0.75322
42.24	1.7565	0.91642
42.284	1.76483	0.92533
42.328	1.8044	1.02036
42.372	1.73518	0.83475
42.416	1.7328	0.84627
42.46	1.9824	0.79493
42.504	2.02029	0.84
42.548	2.07791	0.77118
42.592	2.14153	0.72966
42.636	2.01596	0.83475
42.68	2.3519	0.776
42.724	2.05753	0.65913
42.768	2.24884	0.78386
42.812	2.3756	0.72528
42.856	2.39946	0.832
42.9	2.41433	0.77118
42.944	2.42191	0.9157
42.988	2.44768	0.87148
43.032	2.49981	0.84444
43.076	2.59482	0.82431
43.12	2.68545	0.808
43.164	2.60057	0.75111
43.208	3.04315	0.78899
43.252	2.88069	0.904
43.296	3.11923	0.81673
43.34	3.20522	0.79077
43.384	2.75169	0.75242
43.428	3.11227	0.79368
43.472	3.15173	0.72848
43.516	3.17103	0.832
43.56	3.06507	0.78553
43.604	3.2224	0.888
43.648	3.19344	0.81124
43.692	3.25388	0.64
43.736	3.65722	0.72329
43.78	4.06601	0.88513
43.824	3.99493	0.84344
43.868	4.12932	0.776
43.912	4.09878	0.69892
43.956	4.16332	0.6864
44	4.28064	0.73527
44.044	4.26992	0.92186
44.088	4.68585	0.81333
44.132	4.74867	0.72
44.176	4.75708	0.7471
44.22	5.16416	0.776
44.264	5.11679	0.78269
44.308	5.23973	0.69846
44.352	5.37601	0.76558
44.396	5.54268	0.84
44.44	5.61482	0.104
44.484	5.93447	0.776
44.528	6.0204	0.55721
44.572	6.37976	0.664
44.616	6.51604	0.81935
44.66	6.81261	0.73333
44.704	7.12125	0.81935
44.748	7.04699	0.6864
44.792	6.9174	0.79368
44.836	7.47126	1.05333
44.88	7.7626	0.85263
44.924	8.06026	0.66815
44.968	8.27459	0.85391
45.012	8.53718	0.81838
45.056	8.77045	0.41873
45.1	9.20151	0.78899
45.144	9.18219	0.81046
45.188	9.76096	0.94305
45.232	10.0689	0.92533
45.276	10.3352	0.72
45.32	10.8001	0.68889
45.364	10.8381	0.87556
45.408	11.2344	0.80055
45.452	11.731	0.79493
45.496	11.8674	0.75784
45.54	12.4927	0.74613
45.584	12.6637	0.84
45.628	13.1288	0.24465
45.672	13.3778	0.88414
45.716	13.6545	0.85641
45.76	14.3451	1.01287
45.804	14.5383	0.88211
45.848	15.188	1.11042
45.892	15.4292	0.95333
45.936	16.0543	0.69778
45.98	16.3972	0.77091
46.024	17.1433	0.69892
46.068	17.4456	0.80981
46.112	17.6199	1.10182
46.156	18.1847	0.11273
46.2	18.681	0.16
46.244	19.0682	0.20853
46.288	19.4688	0.16
46.332	20.0302	0.12348
46.376	20.4091	0.06892
46.42	21.6973	0.19652
46.464	21.9352	0.104
46.508	22.6938	0.08103
46.552	22.6875	0.16988
46.596	22.2109	0.27742
46.64	21.6705	0.02
46.684	20.8993	0.1936
46.728	20.7186	0.00444
46.772	19.8029	0.00218
46.816	19.2612	0.06667
46.86	19.137	0.09778
46.904	18.1936	0.20941
46.948	17.7127	0.19111
46.992	17.1023	0.08364
47.036	16.6764	0.24776
47.08	16.2234	0.10684
47.124	15.8602	0.05778
47.168	15.2337	0.14746
47.212	14.7231	0.14495
47.256	14.7401	-0.0197
47.3	13.8974	0.02359
47.344	13.5527	0.37778
47.388	13.1621	0.1959
47.432	12.9957	0.2
47.476	12.703	0.39277
47.52	12.1284	0.06447
47.564	11.7829	0.2
47.608	11.4824	0.10857
47.652	10.9936	0.26716
47.696	10.8861	0.23556
47.74	10.3134	-0.02261
47.784	10.2164	0.13846
47.828	9.96311	0.16394
47.872	9.42575	-0.04889
47.916	9.17891	0.07765
47.96	8.94473	0.13455
48.004	8.52475	0.45191
48.048	8.33625	0.05231
48.092	8.41506	-0.008
48.136	7.75014	-0.08387
48.18	7.69585	0.055
48.224	7.52388	0.34968
48.268	7.28559	0.41333
48.312	7.15986	0.14526
48.356	6.79509	0.17647
48.4	6.57453	0.22909
48.444	6.3608	0.08741
48.488	6.28341	0.265
48.532	6.28325	0.12585
48.576	5.88558	0.264
48.62	5.83635	0.02933
48.664	5.42403	0.31273
48.708	5.41119	0.10033
48.752	5.41072	0.1827
48.796	5.24633	0.32066
48.84	4.86427	0.11893
48.884	4.78089	0.07765
48.928	4.65497	0.265
48.972	4.44085	0.18545
49.016	4.54673	-0.0304
49.06	4.23056	0.328
49.104	4.20071	0.08741
49.148	3.88426	-0.0713
49.192	4.01953	0.08
49.236	3.79965	0.10033
49.28	3.73143	0.16
49.324	3.50565	0.07649
49.368	3.57909	0.30203
49.412	3.43595	0.25966
49.456	3.58167	0.14353
49.5	3.35305	0.195
49.544	3.2932	0.168
49.588	2.98875	0.07765
49.632	3.04	0.22759
49.676	2.9532	0.24
49.72	2.89559	0.23512
49.764	2.72494	-0.02261
49.808	2.72472	0.12
49.852	2.88871	0.07269
49.896	2.7332	0.09333
49.94	2.61558	0.22759
49.984	2.35185	0.26621
50.028	2.52397	0.31355
50.072	2.33274	0.15509
50.116	2.34152	0.008
50.16	2.37109	0.072
50.204	2.25517	0.02933
50.248	2.18357	0.26038
50.292	2.12533	0.01176
50.336	2.03415	0.09854
50.38	1.93988	0.34491
50.424	2.05012	0.02609
50.468	1.99151	0.24
50.512	2.16779	0.02609
50.556	1.8743	0.52542
50.6	1.92188	0.15509
50.644	1.89571	0.8157
50.688	1.82545	0.98377
50.732	1.84963	0.85506
50.776	1.57529	0.94831
50.82	1.54319	0.85208
50.864	1.77761	0.89818
50.908	1.61086	0.84627
50.952	1.6782	1.07
50.996	1.55747	0.8902
51.04	1.49398	0.95747
51.084	1.40658	0.86192
51.128	1.6101	0.88958
51.172	1.53223	0.9104
51.216	1.49029	0.90776
51.26	1.10909	0.75899
51.304	1.40127	0.93412
51.348	1.34328	0.84444
51.392	1.29236	0.83475
51.436	1.19454	0.97128
51.48	0.81595	0.86192
51.524	1.11564	0.88414
51.568	1.11065	0.895
51.612	1.10423	1.08
51.656	1.01142	0.83529
51.7	1.18515	1
51.744	0.98478	0.86192
51.788	1.00994	0.86753
51.832	0.91862	1.03862
51.876	0.87163	1.01318
51.92	0.89037	1.08615
51.964	0.83931	0.81612
52.008	0.64065	0.86424
52.052	0.89014	1
52.096	1.06727	0.895
52.14	0.88354	0.84
52.184	1.35377	1
52.228	0.75914	1
52.272	0.96332	0.96606
52.316	0.87488	0.82769
52.36	0.81238	0.96463
52.404	1.01016	0.78553
52.448	0.9301	0.8315
52.492	0.9747	0.95397
52.536	0.88388	0.90667
52.58	0.81955	0.84492
52.624	0.82701	0.94667
52.668	0.84463	0.79493
52.712	0.65548	0.89818
52.756	0.9847	0.93212
52.8	0.73677	1.07467
52.844	0.73407	0.98222
52.888	0.65142	0.92276
52.932	0.90099	0.92329
52.976	0.66724	0.76667
53.02	0.4267	0.96387
53.064	0.97019	0.83475
53.108	0.64322	0.94667
53.152	0.5973	0.80444
53.196	0.58094	0.8947
53.24	0.71656	0.79803
53.284	0.68904	0.79368
53.328	0.8293	1.03294
53.372	0.69658	0.92533
53.416	1.02021	0.84
53.46	0.75845	0.87938
53.504	0.72052	0.94667
53.548	0.86613	0.95397
53.592	0.94369	0.86
53.636	0.64695	0.92364
53.68	0.97619	0.88211
53.724	0.83452	0.88513
53.768	0.68779	0.87855
53.812	0.81605	0.72757
53.856	0.86777	0.81333
53.9	0.83785	0.80235
53.944	1.01942	0.8303
53.988	0.87612	0.84
54.032	0.81419	0.89608
54.076	0.91986	0.90044
54.12	0.98095	0.84552
54.164	1.06117	0.92696
54.208	1.12609	0.95022
54.252	1.02593	0.96267
54.296	1.19513	0.78182
54.34	1.13959	1.03294
54.384	0.9052	1
54.428	1.08562	0.77165
54.472	1.05553	0.87556
54.516	1.15639	0.86192
54.56	1.05031	0.88486
54.604	1.11957	0.91111
54.648	1.25278	0.76421
54.692	1.21472	0.82871
54.736	1.28386	1.028
54.78	1.28807	0.86157
54.824	0.98166	0.79733
54.868	1.02297	0.74925
54.912	1.08786	0.96138
54.956	1.07604	0.85702
55	1.13518	0.80587
55.044	1.36856	1.0487
55.088	1.39518	0.82145
55.132	1.43816	0.85067
55.176	1.40061	0.85263
55.22	1.40966	0.81091
55.264	1.26466	0.86192
55.308	1.34261	0.9082
55.352	1.62938	0.76494
55.396	1.5005	0.77204
55.44	1.77292	0.91385
55.484	1.52629	0.90667
55.528	1.40663	0.85067
55.572	1.70551	0.83573
55.616	1.77356	0.79259
55.66	1.56526	0.90919
55.704	2.30417	0.85641
55.748	1.82783	0.70667
55.792	1.90287	0.87556
55.836	2.03725	0.91884
55.88	2.02556	0.9002
55.924	2.20368	0.8069
55.968	2.14328	0.85702
56.012	2.01251	0.95852
56.056	1.9487	0.86286
56.1	2.21478	0.84
56.144	2.32094	0.91158
56.188	2.5936	0.8499
56.232	2.53971	0.93086
56.276	2.55457	0.91216
56.32	2.28851	0.94985
56.364	2.6211	1.03775
56.408	2.50822	0.83094
56.452	2.71069	0.76338
56.496	2.48638	0.94343
56.54	2.74242	0.91385
56.584	2.99214	0.87967
56.628	3.0483	0.98507
56.672	3.23053	0.888
56.716	3.06813	0.95952
56.76	3.47018	0.89073
56.804	3.45117	0.85803
56.848	3.37119	0.66909
56.892	3.52392	0.90468
56.936	3.43666	0.81673
56.98	3.50975	0.84674
57.024	3.43621	0.85067
57.068	3.92135	0.86977
57.112	3.93023	0.79527
57.156	3.91974	0.72
57.2	4.08081	0.86824
57.244	4.48109	0.98651
57.288	4.33276	0.84372
57.332	4.41978	0.87077
57.376	4.31447	0.776
57.42	4.46277	0.89434
57.464	4.98878	0.80829
57.508	5.16453	1.01836
57.552	5.18253	1
57.596	5.21629	1
57.64	5.44516	0.9552
57.684	5.43068	1.02435
57.728	5.61828	1.0634
57.772	5.78418	0.96536
57.816	5.93719	0.8069
57.86	6.4258	0.87938
57.904	6.27128	0.97455
57.948	6.58925	1.05209
57.992	6.69991	1
58.036	7.16703	0.78039
58.08	7.25294	0.95234
58.124	7.40637	0.81673
58.168	7.53439	1
58.212	8.0026	0.7706
58.256	8.07458	0.85263
58.3	8.3691	0.76558
58.344	8.4293	0.74456
58.388	9.01968	0.93891
58.432	9.13542	1.03613
58.476	9.35087	0.94105
58.52	9.69633	0.88085
58.564	9.76985	0.73953
58.608	10.5276	0.19015
58.652	10.8319	0.85263
58.696	10.6774	0.91884
58.74	11.3411	0.88163
58.784	11.5288	0.70059
58.828	11.9777	0.67816
58.872	12.1937	0.872
58.916	12.8077	0.84674
58.96	13.5657	0.76615
59.004	13.5091	0.65
59.048	13.9741	0.85839
59.092	14.1943	0.9002
59.136	15.0684	0.8364
59.18	15.0332	0.82316
59.224	15.6156	0.71627
59.268	16.4827	0.66909
59.312	16.509	0.45366
59.356	17.4926	0.86909
59.4	16.9699	0.09447
59.444	17.457	0.09333
59.488	17.6979	0.20941
59.532	18.4855	0.12157
59.576	19.1366	0.12889
59.62	19.9437	0.2186
59.664	20.0923	0.0806
59.708	20.9562	0.11273
59.752	21.6652	0.04471
59.796	22.3605	0.22259
59.84	22.3358	0.14353
59.884	22.1011	0.05013
59.928	22.0291	0.29674
59.972	20.9831	0.1827
60.016	20.6045	0.24202
60.06	19.4069	0.0144
60.104	18.9872	0.11579
60.148	18.5536	0.16
60.192	17.8134	0.12548
60.236	16.9819	0.15077
60.28	16.4217	-0.07284
60.324	16.4567	0.23951
60.368	15.8136	0.0486
60.412	15.5256	0.22462
60.456	14.8215	0.22462
60.5	14.4964	0.28923
60.544	14.1971	0.09538
60.588	13.8246	0.14047
60.632	13.202	0.08
60.676	12.658	0.06023
60.72	12.4058	0.09
60.764	12.1784	0.07064
60.808	11.6674	0.01023
60.852	11.2313	0.06411
60.896	11.4704	0.08103
60.94	10.8007	0.25859
60.984	10.5226	0.21471
61.028	9.95081	0.13667
61.072	9.90703	0.22462
61.116	9.42331	0.22844
61.16	9.20457	0.04
61.204	8.98485	0.10123
61.248	8.8407	0.04593
61.292	8.60502	0.12548
61.336	7.98253	0.30824
61.38	7.96384	0.31077
61.424	7.88412	0.21471
61.468	7.29902	0.168
61.512	7.03588	0.14576
61.556	6.98335	-0.000533333
61.6	6.99818	0.11172
61.644	6.85245	0.44747
61.688	6.43509	0.2
61.732	6.2985	-0.03385
61.776	6.17508	0.328
61.82	5.79287	0.13747
61.864	5.68758	0.08103
61.908	5.5527	0.36
61.952	5.49943	0.09132
61.996	5.38991	0.1809
62.04	5.06194	0.20941
62.084	4.99347	0.13846
62.128	4.66327	0.13971
62.172	4.45476	0.19624
62.216	4.75392	0.12348
62.26	4.51229	0.12123
62.304	4.21086	0.22462
62.348	4.17485	0.08741
62.392	4.02756	0.3177
62.436	3.97392	0.02933
62.48	3.91466	0.29354
62.524	3.7702	0.30532
62.568	3.83528	0.1488
62.612	3.53414	0.28946
62.656	3.58397	0.18545
62.7	3.26397	0.12548
62.744	3.01446	0.168
62.788	3.25114	0.24822
62.832	3.1182	0.30667
62.876	3.07682	0.07765
62.92	2.87647	0.29481
62.964	2.90439	0.18897
63.008	3.02711	0.01176
63.052	2.5901	-0.02118
63.096	2.56374	0.23368
63.14	2.66032	0.12889
63.184	2.62443	-0.06537
63.228	2.36507	0.18685
63.272	2.42784	0.44709
63.316	2.49996	0.15034
63.36	2.27262	0.16
63.404	2.33058	0.20421
63.448	2.12985	0.09333
63.492	2.14138	0.12548
63.536	2.10908	0.1078
63.58	1.95322	0.34345
63.624	2.20313	0.13239
63.668	1.97833	0.20853
63.712	2.11441	0.14133
63.756	2.09686	0.25818
63.8	2.06288	0.29813
63.844	1.8056	0.07122
63.888	1.82257	0.20941
63.932	1.84824	0.20421
63.976	1.52768	0.82458
64.02	1.95	0.94831
64.064	1.53717	0.90776
64.108	1.47422	0.85263
64.152	1.49382	0.92276
64.196	1.71365	0.97333
64.24	1.52505	0.91385
64.284	1.60827	0.98682
64.328	1.62232	0.80371
64.372	1.412	0.88923
64.416	1.54208	0.76558
64.46	1.47846	0.81333
64.504	1.29768	0.75652
64.548	1.55692	0.9513
64.592	1.47412	0.73333
64.636	1.35544	0.94667
64.68	1.22461	0.94791
64.724	1.14981	0.872
64.768	1.33935	0.98164
64.812	1.26952	0.95268
64.856	1.36365	0.84552
64.9	1.27492	0.85702
64.944	1.07979	0.96606
64.988	1.11821	0.83123
65.032	1.20953	0.84955
65.076	1.11745	1
65.12	0.94914	1.03111
65.164	1.14772	0.95952
65.208	1.02821	0.87273
65.252	0.9055	0.91385
65.296	0.96924	1
65.34	0.99408	0.86
65.384	0.77785	0.8364
65.428	0.60262	1.05169
65.472	0.86744	1.02383
65.516	0.9154	0.98617
65.56	0.8443	0.98742
65.604	1.02148	0.90261
65.648	1.07342	0.91111
65.692	0.90942	0.83407
65.736	0.88628	0.83529
65.78	0.80071	0.78087
65.824	0.99281	0.79077
65.868	0.99587	0.85391
65.912	0.88224	0.9513
65.956	0.84439	0.82025
66	0.95184	0.9104
66.044	0.76912	0.85548
66.088	0.74627	0.90919
66.132	0.59693	0.89818
66.176	0.75776	0.87299
66.22	0.76997	0.76494
66.264	0.74286	0.73573
66.308	0.72029	0.76667
66.352	0.7317	0.84
66.396	0.97549	0.66815
66.44	0.49835	0.82458
66.484	0.43179	0.832
66.528	0.94362	1.096
66.572	0.69856	0.75652
66.616	0.73828	0.97053
66.66	0.76558	0.82182
66.704	0.86874	0.84727
66.748	0.92473	0.79259
66.792	0.7869	0.87782
66.836	0.79219	0.90118
66.88	0.7369	0.96047
66.924	0.88875	0.84
66.968	0.58282	0.888
67.012	0.69094	0.78386
67.056	0.85907	0.92
67.1	0.71819	0.85481
67.144	0.57531	0.84955
67.188	0.75785	0.80587
67.232	0.7812	0.85067
67.276	0.82206	0.81149
67.32	0.78219	0.80522
67.364	0.89615	0.92329
67.408	1.07527	0.9002
67.452	0.89948	0.85263
67.496	1.09081	0.74613
67.54	0.99667	0.80522
67.584	1.039	0.6973
67.628	0.98565	0.82316
67.672	0.9214	0.72406
67.716	1.12815	0.85506
67.76	1.11584	0.87148
67.804	1.25039	0.8656
67.848	1.14928	0.9552
67.892	1.08757	0.91704
67.936	1.15912	0.70133
67.98	1.04297	0.552
68.024	1.23159	0.75564
68.068	1.33742	0.75652
68.112	1.26884	0.92911
68.156	1.20505	0.92533
68.2	1.27733	0.93778
68.244	1.30291	0.776
68.288	1.29898	0.81673
68.332	1.38209	0.82458
68.376	1.24231	0.81714
68.42	1.14263	0.91191
68.464	1.50417	0.79368
68.508	1.56067	0.73527
68.552	1.55371	0.9082
68.596	1.2827	0.85067
68.64	1.49454	0.79119
68.684	1.71784	0.85391
68.728	1.75929	0.82316
68.772	1.61858	0.90076
68.816	1.60133	0.83709
68.86	1.56375	0.8479
68.904	1.57429	0.888
68.948	1.55633	0.86753
68.992	1.72416	1.032
69.036	1.93147	0.82316
69.08	1.98734	1.05508
69.124	2.04146	0.84674
69.168	2.00328	0.85481
69.212	2.0729	0.91191
69.256	1.83805	0.80235
69.3	2.28343	0.84492
69.344	2.18251	0.86753
69.388	2.18755	0.63718
69.432	2.30399	0.65913
69.476	2.31311	0.87556
69.52	2.49857	0.93253
69.564	2.46293	0.86246
69.608	2.32878	0.87855
69.652	2.41462	0.85263
69.696	2.6939	0.85208
69.74	2.79972	0.86824
69.784	2.67514	0.87556
69.828	3.02045	0.73333
69.872	2.90293	0.68
69.916	2.97181	0.888
69.96	3.03087	0.83667
70.004	3.29974	0.79636
70.048	2.9092	0.97964
70.092	3.04748	0.86341
70.136	3.22559	0.7706
70.18	3.40012	0.90919
70.224	3.40522	1
70.268	3.54993	0.67729
70.312	3.54904	0.84
70.356	3.55077	1.01778
70.4	3.86158	0.91642
70.444	4.11871	0.70963
70.488	4.0955	0.81091
70.532	4.18594	0.8364
70.576	4.26517	0.65115
70.62	4.45322	0.76828
70.664	4.39801	0.26244
70.708	4.67884	0.744
70.752	4.70207	0.87556
70.796	4.8375	0.87556
70.84	4.97348	0.54943
70.884	5.22067	0.6973
70.928	5.23603	0.78607
70.972	5.50787	0.87556
71.016	5.63524	0.69951
71.06	5.63743	0.98507
71.104	6.02003	0.86341
71.148	6.27213	0.56174
71.192	6.42761	0.61644
71.236	6.50265	0.73527
71.28	6.7991	0.75415
71.324	6.85931	0.8069
71.368	7.19587	0.65653
71.412	7.44643	0.93
71.456	7.84083	0.87826
71.5	7.87857	0.78868
71.544	8.26886	0.70667
71.588	8.35938	0.84
71.632	8.87293	0.86909
71.676	8.99687	1.01672
71.72	9.20111	0.73787
71.764	9.50492	0.78146
71.808	9.66448	0.86133
71.852	10.134	0.60649
71.896	10.3247	0.97053
71.94	10.9348	0.8656
71.984	11.0465	0.82957
72.028	11.4963	0.524
72.072	11.5911	0.73867
72.116	12.2431	0.93
72.16	12.21	0.91918
72.204	12.7768	0.85391
72.248	13.2539	0.85641
72.292	13.7186	0.68198
72.336	13.8983	0.776
72.38	14.2993	0.84923
72.424	14.8587	0.86
72.468	15.2499	0.72257
72.512	15.8593	0.78811
72.556	16.0076	0.63636
72.6	16.4428	0.6841
72.644	17.1608	0.872
72.688	17.8438	0.93253
72.732	18.0315	0.94985
72.776	18.7225	0.83319
72.82	19.3572	0.83407
72.864	20.1958	0.72
72.908	20.3952	0.92329
72.952	20.3295	-0.00211
72.996	20.8813	0.168
73.04	22.2012	0.28976
73.084	21.9287	0.18049
73.128	22.3605	0.10725
73.172	22.2121	0.04505
73.216	21.2135	0.02609
73.26	21.0455	-0.06256
73.304	19.7956	-0.01933
73.348	20.1812	0.13402
73.392	19.0413	-0.008
73.436	18.0922	-0.00513
73.48	17.8847	0.02933
73.524	17.179	0.04593
73.568	16.5928	-0.056
73.612	16.3073	-0.08754
73.656	15.5517	0.02298
73.7	15.6872	0.02933
73.744	14.5915	0.33231
73.788	14.6853	0.2
73.832	14.1505	0.07712
73.876	13.681	0.19111
73.92	13.4434	0.09221
73.964	12.6503	0.09
74.008	12.4625	0.2
74.052	12.0346	0.17647
74.096	11.5763	0.13402
74.14	11.6394	0.25333
74.184	11.1452	0.2384
74.228	10.6755	0.2186
74.272	10.4071	0.20719
74.316	10.0874	0.18897
74.36	9.76313	0.25333
74.404	9.54855	0.03342
74.448	9.41912	0.24324
74.492	8.76365	0.22462
74.536	8.62385	0.104
74.58	8.39607	0.36314
74.624	7.96019	0.26316
74.668	8.09936	0.26128
74.712	7.50669	0.01714
74.756	7.4347	0.09677
74.8	7.29852	0.26316
74.844	7.01384	0.14783
74.888	6.88011	0.09778
74.932	6.70177	0.07358
74.976	6.52578	0.18202
75.02	6.27288	0.04
75.064	6.19237	0.328
75.108	5.89435	-0.07022
75.152	5.6272	0.24822
75.196	5.44257	0.12585
75.24	5.28474	0.11579
75.284	5.27206	0.13169
75.328	5.10956	0.12289
75.372	5.0173	0.125
75.416	4.86685	0.21753
75.46	4.79435	0.048
75.504	4.61671	0.25333
75.548	4.35838	0.03719
75.592	4.23712	0.11172
75.636	4.12461	0.15034
75.68	4.01232	0.14576
75.724	3.87169	0.076
75.768	3.88514	0.33763
75.812	4.08765	0.02689
75.856	3.87808	0.14047
75.9	3.67841	0.09333
75.944	3.6684	0.21753
75.988	3.36234	-0.008
76.032	3.24829	0.15654
76.076	3.4737	0.28727
76.12	3.24364	0.25333
76.164	3.08116	0.30378
76.208	2.9389	0.11893
76.252	2.98636	0.21049
76.296	2.8129	0.23512
76.34	2.71727	0.18685
76.384	2.58828	0.20719
76.428	2.7384	0.13143
76.472	2.81594	0.13937
76.516	2.30277	0.07765
76.56	2.39935	-0.024
76.604	2.45348	0.28205
76.648	2.60224	0.13519
76.692	2.27722	0.08364
76.736	1.92873	0.02933
76.78	2.37658	0.01176
76.824	2.16663	0.13971
76.868	2.08512	0.17867
76.912	2.13498	-0.12
76.956	1.94912	0.27351
77	1.95163	0.24948
77.044	1.96238	0.12585
77.088	1.7663	0.07765
77.132	1.73719	0.18049
77.176	1.55206	0.25783
77.22	1.76228	-0.16
77.264	1.65048	0.27385
77.308	1.78693	0.34345
77.352	1.54734	0.19549
77.396	1.81202	-0.02261
77.44	1.60388	0.75242
77.484	1.6497	0.70849
77.528	1.91121	0.776
77.572	1.60255	0.72406
77.616	1.67568	0.86192
77.66	1.72875	0.92
77.704	1.39422	0.83726
77.748	1.33735	0.72301
77.792	1.38528	0.78146
77.836	1.21495	0.87938
77.88	1.33322	0.8963
77.924	1.47816	0.84444
77.968	1.23044	0.80089
78.012	1.211	0.82
78.056	1.19971	0.75111
78.1	1.24167	0.62667
78.144	0.70595	0.83689
78.188	1.284	0.81091
78.232	0.8282	0.76558
78.276	1.49003	0.8157
78.32	1.15437	0.93086
78.364	1.39393	0.80522
78.408	1.01395	0.89818
78.452	0.74993	0.75415
78.496	0.73058	0.78115
78.54	0.93595	0.76986
78.584	0.99934	0.82025
78.628	0.8511	0.90579
78.672	1.0109	0.92
78.716	1.04745	0.91111
78.76	0.93378	0.86909
78.804	1.03513	1.01723
78.848	0.80714	0.84
78.892	1.08466	0.93
78.936	0.82966	0.91385
78.98	0.9606	0.91884
79.024	0.98429	0.96138
79.068	0.62543	0.83475
79.112	1.06824	0.80936
79.156	1.00232	0.97333
79.2	0.87279	0.87556
79.244	0.89841	0.98796
79.288	0.81054	1.01623
79.332	0.87655	0.85641
79.376	0.78671	0.89818
79.42	0.8421	0.84492
79.464	0.86176	0.85506
79.508	0.67445	0.85208
79.552	0.69869	0.95692
79.596	0.59912	1
79.64	0.65254	0.895
79.684	0.35883	0.87032
79.728	0.52116	0.888
79.772	0.41648	0.91385
79.816	0.49523	0.9513
79.86	0.38398	0.73063
79.904	0.4218	0.82769
79.948	0.59797	0.755
79.992	0.49893	0.776
80.036	0.90748	0.85506
80.08	0.8356	1.03862
80.124	0.62308	0.83123
80.168	0.9031	1.06222
80.212	0.72401	0.64
80.256	0.85135	0.80587
80.3	0.99367	1
80.344	0.8838	0.8902
80.388	0.57991	0.86712
80.432	0.97815	1
80.476	0.9805	0.9002
80.52	0.70725	1.02545
80.564	0.64778	0.90118
80.608	0.83187	0.79803
80.652	0.98484	0.87892
80.696	0.95458	0.744
80.74	0.91077	1.11042
80.784	0.8657	0.78667
80.828	0.88281	1.02489
80.872	1.01602	0.85157
80.916	1.08711	0.88674
80.96	0.94815	0.96387
81.004	0.97641	0.98545
81.048	0.91985	0.95636
81.092	1.13873	0.95952
81.136	0.56089	0.97053
81.18	1.06441	0.92186
81.224	1.19209	0.76242
81.268	1.32632	1
81.312	1.07395	0.96973
81.356	1.24542	0.82458
81.4	1.41087	0.86753
81.444	1.15016	0.895
81.488	1.29803	0.75322
81.532	1.28777	0.88414
81.576	1.40743	0.87556
81.62	1.54688	0.84
81.664	1.54507	0.76421
81.708	1.41412	0.89073
81.752	1.6461	0.81935
81.796	1.43576	0.89333
81.84	1.57881	0.78607
81.884	1.62891	0.83573
81.928	1.67969	0.73647
81.972	1.50337	0.86424
82.016	1.67564	0.76308
82.06	1.58612	0.93891
82.104	1.57675	0.90321
82.148	1.99382	0.78734
82.192	1.8575	1
82.236	1.69768	1
82.28	1.79115	0.92533
82.324	1.89813	0.80522
82.368	1.93892	0.608
82.412	2.05355	0.72459
82.456	1.74644	0.82578
82.5	1.95982	0.78462
82.544	2.05953	0.92113
82.588	2.2981	0.895
82.632	2.42229	0.8479
82.676	2.17822	0.81333
82.72	2.24371	0.88638
82.764	2.30157	0.91385
82.808	2.34221	0.65778
82.852	2.33504	0.66703
82.896	2.33727	0.84299
82.94	2.50832	0.944
82.984	2.29211	0.88638
83.028	2.71366	0.965
83.072	2.65217	0.89333
83.116	2.90757	0.94305
83.16	2.95395	0.87077
83.204	2.78252	0.80055
83.248	2.90127	0.6722
83.292	3.1976	0.83689
83.336	3.14089	0.70963
83.38	3.43245	0.89434
83.424	3.39473	0.88414
83.468	3.29823	0.8157
83.512	3.27283	0.79163
83.556	3.56253	0.86
83.6	3.67829	0.9108
83.644	3.64131	0.85548
83.688	3.95134	0.888
83.732	3.86915	0.78505
83.776	4.02056	1
83.82	4.25672	0.69694
83.864	4.25965	0.75111
83.908	4.39932	0.81673
83.952	4.31767	0.61722
83.996	4.83869	0.8364
84.04	5.02577	0.98277
84.084	5.06528	0.872
84.128	5.22545	0.80522
84.172	5.20283	0.91191
84.216	5.35439	0.91747
84.26	5.6248	0.88085
84.304	5.64699	1.04364
84.348	5.71389	0.9552
84.392	6.25537	0.776
84.436	6.36841	0.90261
84.48	6.21646	0.84865
84.524	6.53097	0.86753
84.568	6.96651	0.78931
84.612	6.85282	0.93086
84.656	7.25253	0.50222
84.7	7.53332	0.7554
84.744	7.62507	0.76828
84.788	8.05417	0.89818
84.832	8.16434	0.87032
84.876	8.49785	0.89818
84.92	8.90942	0.86
84.964	8.89783	0.95234
85.008	9.06181	0.16596
85.052	9.62707	-0.21956
85.096	9.63064	1.06109
85.14	10.2114	0.92186
85.184	10.3318	0.93412
85.228	10.6619	0.5072
85.272	11.2958	0.81767
85.316	11.31	0.97128
85.36	11.5688	0.38581
85.404	12.224	0.92774
85.448	12.3234	0.94343
85.492	12.7961	0.748
85.536	13.2148	0.66873
85.58	13.6461	0.59556
85.624	13.3607	0.07692
85.668	14.1254	-0.02795
85.712	14.3074	0.06447
85.756	14.3217	0.104
85.8	15.2477	0.13937
85.844	15.5616	0.2384
85.888	15.9927	0.20582
85.932	16.4698	-0.26
85.976	17.0429	0.1936
86.02	17.3861	0.216
86.064	18.0539	0.05231
86.108	18.5983	0.02545
86.152	19.116	0.18897
86.196	19.5728	0.25703
86.24	20.1815	0.04193
86.284	21.3708	0.19165
86.328	22.3	0.04
86.372	22.3157	0.12216
86.416	22.5106	-0.08845
86.46	21.9649	0.14495
86.504	21.1228	0.11718
86.548	21.0909	0.16295
86.592	20.1417	0.03628
86.636	19.3667	0.11893
86.68	18.9578	-0.14765
86.724	18.3382	-0.01205
86.768	17.7934	0.01576
86.812	17.1843	-0.00513
86.856	16.9194	-0.00211
86.9	16.3305	0.09082
86.944	15.9683	0.14716
86.988	15.6941	0.13239
87.032	14.9032	0.15243
87.076	14.5711	-0.08328
87.12	13.9639	0.14097
87.164	13.8437	0.08364
87.208	13.1119	-0.17091
87.252	12.9933	0.08364
87.296	12.6709	0.08907
87.34	12.2645	0.22909
87.384	12.076	0.14495
87.428	11.4388	0.1827
87.472	10.9973	0.39692
87.516	10.7257	-0.036
87.56	10.3296	0.24324
87.604	10.102	0.28727
87.648	9.8487	0.076
87.692	9.69833	0.2186
87.736	9.15877	0.2
87.78	9.24348	0.19624
87.824	8.74126	0.05455
87.868	8.61848	0.00444
87.912	8.09456	0.08364
87.956	8.15654	0.24923
[truncated: 2,433 more rows]

## Sheet: Figure 2A
force (pN) cycle1	FRET efficiency cycle1	force (pN) cycle6	FRET efficiency cycle6
0.96716	1.06816	0.9723	0.90763
0.8804	0.98324	1.19246	0.98569
1.06047	0.87895	0.93517	0.84094
0.87854	0.93246	1.09566	0.9231
0.84679	0.79664	1.09757	1.1644
0.88224	0.98201	0.94319	0.87116
0.71888	0.84094	1.06856	1.04479
0.90214	0.79621	1.14363	0.8683
0.88955	0.84245	1.21	0.95533
0.717	0.87568	0.90624	1.05024
0.93811	0.83991	1.08843	0.95054
0.8657	0.82442	1.15918	0.63614
0.90277	0.8355	1.10719	0.91503
1.00698	0.65899	1.16608	1.01189
1.02481	0.85952	1.04693	0.79467
1.15736	0.75484	1.18758	0.87568
1.01451	0.79232	1.38492	0.75642
1.00303	0.80972	1.35428	0.882
1.04634	0.66732	1.02218	0.87836
0.97401	0.82291	1.1379	0.86597
0.9622	0.74868	1.38102	0.95739
1.03108	0.83613	1.40297	1.09809
1.03025	1.01315	1.18185	0.86042
1.24788	0.85081	1.34723	0.9248
1.19206	0.7027	1.43736	0.82343
1.23895	0.78993	1.47182	0.8405
1.27712	0.96136	1.48129	0.89239
1.35761	0.83855	1.3745	0.84489
1.21715	0.74868	1.49278	1.0404
1.34159	0.92417	1.2803	0.5721
1.26248	0.78211	1.54981	0.95928
1.4692	0.8482	1.67979	1.01086
1.48647	1.09287	1.6794	0.6869
1.45647	0.48953	1.7672	0.77341
1.49715	0.77301	1.57899	0.8068
1.42927	0.79042	1.61264	0.92599
1.40568	0.9025	1.7373	0.83808
1.39709	0.83766	1.87835	0.7251
1.4154	0.97347	1.82037	0.99854
1.44413	0.95171	1.88182	0.7639
1.48859	0.87116	1.91697	1.0755
1.65462	0.59538	1.95842	1.09873
1.64669	0.80696	1.7866	1.28925
1.63835	0.73728	1.91446	1.07831
1.83402	0.88543	1.98295	0.75843
1.71698	0.7314	2.00191	0.79765
1.79147	0.84682	1.92242	0.61448
1.91037	1.0127	2.11717	0.80324
2.0338	0.82253	2.15153	0.87836
1.90396	0.69584	2.12837	0.94054
1.71658	0.67135	2.29111	0.53591
1.94883	0.83855	2.25958	0.74604
1.81973	0.77769	2.34408	1.11844
1.96206	0.81327	2.41794	1.18922
1.98411	0.73336	2.37154	1.09287
2.18545	0.85952	2.6188	0.882
2.18692	0.77997	2.5194	0.83332
2.24094	0.7885	2.63685	0.99757
2.16668	0.65462	2.60869	0.96994
2.1491	0.93531	2.80376	0.83167
2.16431	0.99581	2.70686	0.79467
2.25472	0.68924	2.85268	0.85089
2.40822	0.69664	2.90137	0.87492
2.3746	0.75843	2.92284	0.9398
2.50949	0.81074	3.04467	0.89735
2.33393	0.82291	3.19723	1.00973
2.46003	0.93812	3.26278	0.92808
2.74741	0.92808	3.27445	0.83991
2.74967	0.86351	3.34677	0.96559
2.88994	1.24852	3.54392	1.01153
2.91265	0.63342	3.46456	1.18139
2.88393	0.62887	3.58578	1.24852
2.98875	0.70582	3.58519	0.84257
2.95307	0.64794	3.86932	0.85967
2.94708	0.67509	3.92218	0.94139
3.22867	0.83166	4.08284	1.06601
3.30612	0.59547	4.24666	0.91854
3.57246	0.72747	4.36211	0.89818
3.43432	0.58196	4.48943	0.80462
3.39495	0.74808	4.45986	0.76606
3.66468	0.80092	4.58238	0.7956
3.68587	0.64139	4.87941	0.86126
3.73591	0.25058	4.99599	0.80696
3.86096	0.78386	5.1438	1.158
4.15741	-0.05938	5.21221	1.00999
4.14898	0.6869	5.43226	0.86963
4.35577	0.75028	5.52448	0.98719
4.35533	0.03385	5.71542	0.91517
4.43043	0.79017	5.85333	0.87116
4.46966	0.5895	6.08618	0.75484
4.77314	0.23324	6.10882	0.97059
5.0076	-2.6e-05	6.54753	1.07915
5.10619	0.81721	6.88272	0.86728
5.00338	0.13284	6.85959	0.92889
5.35271	0.49445	7.23807	0.77323
5.5205	0.76677	7.55648	1.19389
5.76439	0.54003	7.64971	0.89172
5.79319	0.07008	8.56687	0.87736
5.91463	0.11897	8.60218	1.01153
6.10337	0.13324	8.99503	0.99005
6.26423	0.18086	9.23311	0.948
6.32219	-0.04521	9.60574	1.01744
6.723	0.03043	9.67321	0.98059
6.95986	0.0064	10.2714	0.78801
7.07922	-0.05379	10.4517	1.05865
7.1681	0.02696	10.7762	1.05024
7.53396	0.1447	11.0972	0.86963
7.68938	0.04537	11.3507	0.8167
7.8434	-0.0023	11.6505	0.97122
8.13414	0.07517	12.2696	1.06364
8.53914	0.03038	12.5917	0.75233
8.67124	0.11069	13.0406	0.91736
8.85051	0.1136	13.312	0.94559
9.12111	0.05517	13.2685	0.15237
9.49744	0.0874	13.664	0.24384
9.64922	0.25197	13.9603	0.09774
9.89571	0.44071	14.3938	0.04069
10.2443	0.52429	14.8326	0.03051
10.6919	0.68738	15.0925	-0.04521
10.9753	0.8562	15.6665	0.07082
11.3451	0.948	16.1382	-0.02614
11.4973	0.79232	16.6293	0.14777
11.8511	0.18453	17.1749	0.09064
12.2884	0.01966	17.7556	0.04087
12.5966	0.33544	18.3272	0.11897
12.9093	0.27588	19.1729	0.13823
13.5734	0.10691	19.2935	-0.04142
13.6507	0.32493	20.2706	0.11897
13.9649	0.3068	20.7832	0.39229
14.3038	0.17923	21.2898	0.03412
14.7158	0.12789	22.1121	0.06444
15.1629	0.20517
15.5947	0.12938
16.0301	0.06797
16.585	0.11591
17.0642	0.01852
16.8797	0.10691
17.484	0.33545
18.0071	-0.0384
18.4169	0.09879
19.2683	0.11474
19.6221	0.03385
19.8128	0.18043
20.9195	0.00261
21.6701	0.15644
22.139	0.06257

## Sheet: Figure 2B
force (pN) cycles1,2,3	FRET efficiency cycle1,2,3	error	force (pN) cycles5+	FRET efficiency cycles5+	error
0.15	0.81921	0.02208	0.15	0.86326	0.0978
0.65	0.81668	0.00991	0.65	0.80608	0.01479
1.15	0.85769	0.02558	1.15	0.85446	0.01677
1.65	0.81918	0.012	1.65	0.84899	0.02091
2.15	0.78848	0.01381	2.15	0.83885	0.02106
2.65	0.72743	0.01926	2.65	0.82923	0.01775
3.15	0.70537	0.02151	3.15	0.87951	0.02863
3.65	0.5963	0.02854	3.65	0.83715	0.03148
4.15	0.55393	0.03827	4.15	0.83145	0.02006
4.65	0.52072	0.03776	4.65	0.82317	0.03815
5.15	0.53812	0.03797	5.15	0.75949	0.04777
5.65	0.48421	0.04133	5.65	0.80803	0.04058
6.15	0.49856	0.0475	6.15	0.8218	0.04009
6.65	0.48294	0.04732	6.65	0.8465	0.05763
7.15	0.52532	0.05541	7.15	0.80742	0.07899
7.65	0.43961	0.05578	7.65	0.76352	0.07165
8.15	0.5294	0.05445	8.15	0.79238	0.06168
8.65	0.43917	0.06187	8.65	0.82634	0.03673
9.15	0.39354	0.05643	9.15	0.90142	0.04125
9.65	0.45122	0.06036	9.65	0.80804	0.04222
10.15	0.41096	0.05362	10.15	0.8588	0.04142
10.65	0.46139	0.05919	10.65	0.75902	0.12685
11.15	0.34849	0.06041	11.15	0.62251	0.11215
11.65	0.2966	0.06746	11.65	0.65097	0.09775
12.15	0.33425	0.09001	12.15	0.73558	0.12387
12.65	0.40915	0.05676	12.65	0.58432	0.17578
13.15	0.32233	0.06005	13.15	0.65337	0.10543
13.65	0.29054	0.07756	13.65	0.44223	0.1419
14.15	0.31029	0.06066	14.15	0.53988	0.2286
14.65	0.37111	0.05757	14.65	0.50365	0.16162
15.15	0.25153	0.06192	15.15	0.68907	0.18949
15.65	0.27356	0.04233	15.65	0.56397	0.22769
16.15	0.3039	0.0529	16.15	0.5554	0.11281
16.65	0.22155	0.05592	16.65	0.35744	0.17055
17.15	0.28133	0.06132	17.15	0.44952	0.16849
17.65	0.2547	0.07134	17.65	0.31595	0.27509
18.15	0.29163	0.06514	18.15	0.41056	0.16012
18.65	0.23232	0.0798	18.65	0.24634	0.17055
19.15	0.24184	0.06365	19.15	0.09456	0.14899
19.65	0.28513	0.07872	19.65	0.32099	0.1897
20.15	0.2103	0.06439	20.15	0.0487	0.03522
20.65	0.21317	0.07205	20.65	0.04148	0.14208
21.15	0.16156	0.06508	21.15	0.13347	0.06928
21.65	0.34167	0.13464	21.65	0.02452	0.02175
22.15	0.25153	0.06063	22.65	0.29958	0.14051
22.65	0.21587	0.07572	23.15	0.3856	NaN
23.15	0.2158	0.09353	23.65	0.41007	NaN
23.65	0.21558	0.0712	24.15	0.37145	0.1137
24.15	0.04127	0.19788	25.15	0.06396	0.14651
24.65	0.13932	0.19657	25.65	0.54738	NaN
25.15	0.31638	0.09301	26.15	0.45176	0.10155
25.65	0.27036	0.25311	26.65	0.09049	NaN
26.15	0.29901	0.09871	27.15	0.07706	NaN
27.15	0.14689	NaN	28.15	0.15317	NaN
27.65	0.12444	NaN	28.65	0.00756	0.22298
28.15	-0.27195	0.18987
29.15	0.21302	NaN
30.15	1.19416	NaN
31.15	-0.00603	NaN

## Sheet: Figure 3A
force (pN) ED1 601	FRET efficiency 601	error	force (pN) ED1 601-R39	FRET efficiency 601-R39	error
0.45	0.82184	0.0162	0.65	0.79074	0.01444
0.75	0.8167	0.01508	1.15	0.79698	0.01678
1.05	0.80844	0.01821	1.65	0.76566	0.02072
1.35	0.77377	0.03233	2.15	0.77612	0.02016
1.65	0.7398	0.02918	2.65	0.71246	0.03286
1.95	0.74033	0.02944	3.15	0.67362	0.04533
2.25	0.62692	0.04414	3.65	0.6754	0.04138
2.55	0.53243	0.05297	4.15	0.58557	0.05894
2.85	0.43621	0.06112	4.65	0.52789	0.05835
3.15	0.38587	0.05939	5.15	0.65872	0.05853
3.45	0.28598	0.06052	5.65	0.55594	0.0584
3.75	0.1897	0.05897	6.15	0.52823	0.07512
4.05	0.1849	0.04621	6.65	0.51956	0.08015
4.65	0.13042	0.04945	7.15	0.49548	0.11256
4.95	0.15335	0.06143	7.65	0.46066	0.09954
5.25	0.12458	0.04659	8.15	0.55829	0.05958
5.55	0.10226	0.03325	8.65	0.42816	0.08537
6.15	0.09903	0.04962	9.15	0.47208	0.07418
6.45	0.04399	0.03356	9.65	0.48145	0.06996
6.75	0.03328	0.03129	10.15	0.54053	0.0807
7.05	0.0823	0.0405	10.65	0.60067	0.07513
7.35	0.09912	0.04635	11.15	0.60307	0.09507
7.65	0.07636	0.02144	11.65	0.54922	0.12765
7.95	0.03662	0.02787	12.15	0.38346	0.07884
8.25	0.07398	0.04484	12.65	0.56366	0.09047
8.55	0.08207	0.03864	13.15	0.43467	0.15833
8.85	0.09388	0.05183	13.65	0.38723	0.07589
9.15	0.09323	0.0425	14.15	0.41823	0.0982
9.45	0.00984	0.04392	14.65	0.38406	0.13051
9.75	0.00235	0.05146	15.15	0.37827	0.09466
10.05	0.01348	0.05058	15.65	0.3037	0.08616
10.35	0.03682	0.05156	16.15	0.35762	0.11538
10.65	0.08192	0.08418	16.65	0.27258	0.08521
10.95	-0.01617	0.04896	17.15	0.29957	0.09181
11.25	0.04996	0.02561	17.65	0.31381	0.15693
11.55	0.0846	0.03106	18.15	0.26753	0.11601
11.85	0.02948	0.06427	18.65	0.31451	0.08211
12.15	0.09872	0.06393	19.15	0.41643	0.11691
12.45	0.03459	0.02371	19.65	0.12472	0.0562
12.75	0.05862	0.03501	20.15	0.39559	0.16614
13.05	0.04929	0.06188	20.65	0.25098	0.11483
13.35	0.0294	0.0421	21.15	0.19222	0.01838
13.65	-0.08077	0.04996	21.65	0.22424	0.09896
13.95	-0.00511	0.04729	22.15	0.21604	0.11893
14.25	0.0126	0.07489	22.65	0.18938	0.12887
14.55	0.11457	0.09996	23.15	0.51129	0.16283
14.85	-0.03379	0.075	23.65	-0.08168	NaN
15.15	0.06059	0.05758	24.15	0.41194	0.09169
15.45	-0.12545	0.08551	24.65	0.30208	0.11828
15.75	-0.01473	0.05128	25.15	0.68019	NaN
16.05	0.0107	0.12787	25.65	0.5989	NaN
16.35	-0.09925	0.03891	26.15	0.49289	NaN
16.65	-0.00789	0.08742	27.65	0.6414	NaN
16.95	0.12401	NaN

## Sheet: Figure 3B
force (pN) ED2 601	FRET efficiency 601	error	force (pN) ED2 601-R39	FRET efficiency 601-R39	error
0.15	0.89466	0.01615	0.15	0.99774	0.1183
0.45	0.90912	0.00823	0.65	0.90571	0.02372
0.75	0.89173	0.0087	1.15	0.83236	0.05433
1.05	0.92422	0.0094	1.65	0.83847	0.04627
1.35	0.95416	0.01047	2.15	0.91581	0.04659
1.65	0.93585	0.01379	2.65	0.75152	0.1094
1.95	0.91526	0.01074	3.15	0.83277	0.07655
2.25	0.92265	0.0117	3.65	0.71698	0.11495
2.55	0.92487	0.01269	4.15	0.7958	0.05634
2.85	0.8712	0.02626	4.65	0.8463	0.03358
3.15	0.88978	0.02626	5.15	0.88559	0.03908
3.45	0.86877	0.03033	5.65	0.8192	0.04644
3.75	0.89202	0.02667	6.15	0.81309	0.03839
4.05	0.86597	0.03595	6.65	0.80715	0.03359
4.35	0.87757	0.04138	7.15	0.81063	0.05519
4.65	0.8785	0.03714	7.65	0.7643	0.04742
4.95	0.89932	0.02985	8.15	0.90199	0.08617
5.25	0.86151	0.04262	8.65	0.76377	0.06762
5.55	0.85999	0.04906	9.15	0.83314	0.06449
5.85	0.83784	0.0404	9.65	0.73447	0.05669
6.15	0.89041	0.04758	10.15	0.86278	0.07448
6.45	0.86484	0.04631	10.65	0.82004	0.11732
6.75	0.86707	0.04345	11.15	0.75715	0.0513
7.05	0.87062	0.04752	11.65	0.72409	0.09204
7.35	0.91924	0.05521	12.15	0.6263	0.06702
7.65	0.86461	0.05036	12.65	0.63471	0.07263
7.95	0.88861	0.05369	13.15	0.73126	0.09856
8.25	0.88734	0.05103	13.65	0.586	0.08349
8.55	0.87378	0.04753	14.15	0.61226	0.08067
8.85	0.82352	0.08542	14.65	0.58804	0.14463
9.15	0.9893	0.02521	15.15	0.47125	0.0803
9.45	0.88113	0.06109	15.65	0.51822	0.08008
9.75	0.87819	0.06682	16.15	0.65937	0.17403
10.05	0.89438	0.02371	16.65	0.51343	0.0884
10.35	0.83565	0.08057	17.15	0.49758	0.08157
10.65	0.86601	0.06047	17.65	0.42056	0.13594
10.95	0.84631	0.07058	18.15	0.44799	0.07994
11.25	0.88958	0.08409	18.65	0.34173	0.12173
11.55	0.94848	0.02009	19.15	0.41405	0.14827
11.85	0.8817	0.08449	19.65	0.20362	0.07421
12.15	0.83323	0.0694	20.15	0.22053	0.06189
12.45	0.85226	0.10466	20.65	0.17395	0.12755
12.75	0.92017	0.03293	21.15	0.15805	0.06946
13.05	0.8284	0.11037	21.65	0.16171	0.07433
13.35	0.86345	0.07259	22.15	0.1934	0.05783
13.65	0.80924	0.07779	22.65	0.18647	0.06031
13.95	0.84347	0.09755	23.15	0.14854	0.04462
14.25	0.6532	0.13614	23.65	0.06021	0.09981
14.55	0.7445	0.08106	24.15	0.09227	0.03501
14.85	0.49268	0.14995	24.65	0.10119	0.08063
15.15	0.68515	0.09277	25.15	0.1274	NaN
15.45	0.66352	0.13782	25.65	0.04129	0.10589
15.75	0.51619	0.14649	26.15	0.0889	NaN
16.05	0.63622	0.10234	26.65	-0.11146	0.01961
16.35	0.42398	0.12599	27.15	0.02779	NaN
16.65	0.55772	0.09115	27.65	0.62905	0.55554
16.95	0.29928	0.10623	28.15	0.01084	NaN
17.25	0.42556	0.12221	28.65	0.00332	0.16373
17.55	0.36611	0.12673	29.65	-0.09748	NaN
17.85	0.51616	0.11102	30.65	-0.11026	NaN
18.15	0.39998	0.11618	32.15	0.10208	NaN
18.45	0.59524	0.29709	33.65	-0.02847	NaN
19.05	0.30433	NaN	35.65	0.1662	NaN
19.65	0.18518	NaN	36.65	-0.00627	NaN
20.25	0.40409	NaN	38.15	-0.00627	NaN
20.85	0.02559	NaN
21.45	-0.02093	NaN
21.75	0.25332	NaN

## Sheet: Figure 4
force (pN) 601	FRET efficiency 601	error	force (pN) 601-R18	FRET efficiency 601-R18	error	force (pN) 601-R39	FRET efficiency 601-R39	error	force (pN) 601-R56	FRET efficiency 601-R56	error
0.45	0.82184	0.0162	0.65	0.82817	0.01182	0.65	0.79074	0.01444	0.65	0.84089	0.01138
0.75	0.8167	0.01508	1.15	0.84154	0.00969	1.15	0.79698	0.01678	1.15	0.83511	0.00924
1.05	0.80844	0.01821	1.65	0.80905	0.01409	1.65	0.76566	0.02072	1.65	0.83334	0.01275
1.35	0.77377	0.03233	2.15	0.76928	0.01576	2.15	0.77612	0.02016	2.15	0.82528	0.01742
1.65	0.7398	0.02918	2.65	0.74968	0.02571	2.65	0.71246	0.03286	2.65	0.80266	0.02018
1.95	0.74033	0.02944	3.15	0.74171	0.02919	3.15	0.67362	0.04533	3.15	0.77704	0.02316
2.25	0.62692	0.04414	3.65	0.66248	0.03297	3.65	0.6754	0.04138	3.65	0.70208	0.03376
2.55	0.53243	0.05297	4.15	0.55075	0.04263	4.15	0.58557	0.05894	4.15	0.63964	0.04264
2.85	0.43621	0.06112	4.65	0.56701	0.04468	4.65	0.52789	0.05835	4.65	0.68591	0.03753
3.15	0.38587	0.05939	5.15	0.48649	0.05174	5.15	0.65872	0.05853	5.15	0.54825	0.05502
3.45	0.28598	0.06052	5.65	0.3719	0.06032	5.65	0.55594	0.0584	5.65	0.47124	0.0643
3.75	0.1897	0.05897	6.15	0.42716	0.06107	6.15	0.52823	0.07512	6.15	0.39869	0.08126
4.05	0.1849	0.04621	6.65	0.35276	0.06326	6.65	0.51956	0.08015	6.65	0.41115	0.06239
4.65	0.13042	0.04945	7.15	0.30834	0.0653	7.15	0.49548	0.11256	7.15	0.42387	0.07124
4.95	0.15335	0.06143	7.65	0.34048	0.05361	7.65	0.46066	0.09954	7.65	0.25724	0.06493
5.25	0.12458	0.04659	8.15	0.3149	0.06411	8.15	0.55829	0.05958	8.15	0.45713	0.06931
5.55	0.10226	0.03325	8.65	0.27975	0.0626	8.65	0.42816	0.08537	8.65	0.32602	0.10531
6.15	0.09903	0.04962	9.15	0.42575	0.08338	9.15	0.47208	0.07418	9.15	0.4785	0.09135
6.45	0.04399	0.03356	9.65	0.37134	0.08411	9.65	0.48145	0.06996	9.65	0.48136	0.08777
6.75	0.03328	0.03129	10.15	0.31621	0.07375	10.15	0.54053	0.0807	10.15	0.33741	0.07458
7.05	0.0823	0.0405	10.65	0.30862	0.07547	10.65	0.60067	0.07513	10.65	0.41951	0.11695
7.35	0.09912	0.04635	11.15	0.35064	0.08225	11.15	0.60307	0.09507	11.15	0.2951	0.0821
7.65	0.07636	0.02144	11.65	0.19647	0.06376	11.65	0.54922	0.12765	11.65	0.36675	0.07631
7.95	0.03662	0.02787	12.15	0.34503	0.07233	12.15	0.38346	0.07884	12.15	0.31753	0.08035
8.25	0.07398	0.04484	12.65	0.23492	0.07472	12.65	0.56366	0.09047	12.65	0.35297	0.11909
8.55	0.08207	0.03864	13.15	0.28237	0.05301	13.15	0.43467	0.15833	13.15	0.14367	0.08724
8.85	0.09388	0.05183	13.65	0.21074	0.04649	13.65	0.38723	0.07589	13.65	0.21089	0.12527
9.15	0.09323	0.0425	14.15	0.2264	0.0617	14.15	0.41823	0.0982	14.15	0.32949	0.13363
9.45	0.00984	0.04392	14.65	0.25979	0.12336	14.65	0.38406	0.13051	14.65	0.23348	0.13589
9.75	0.00235	0.05146	15.15	0.22727	0.07494	15.15	0.37827	0.09466	15.15	0.25393	0.11253
10.05	0.01348	0.05058	15.65	0.26654	0.07861	15.65	0.3037	0.08616	15.65	0.25424	0.07028
10.35	0.03682	0.05156	16.15	0.18445	0.05405	16.15	0.35762	0.11538	16.15	0.28306	0.09569
10.65	0.08192	0.08418	16.65	0.14175	0.06352	16.65	0.27258	0.08521	16.65	0.30541	0.09751
10.95	-0.01617	0.04896	17.15	0.13354	0.0879	17.15	0.29957	0.09181	17.15	0.06875	0.0844
11.25	0.04996	0.02561	17.65	0.21533	0.09298	17.65	0.31381	0.15693	17.65	0.3263	0.09874
11.55	0.0846	0.03106	18.15	0.1647	0.06989	18.15	0.26753	0.11601	18.15	0.11025	0.12486
11.85	0.02948	0.06427	18.65	0.17658	0.05002	18.65	0.31451	0.08211	18.65	0.06418	0.11513
12.15	0.09872	0.06393	19.15	-0.000811	0.08502	19.15	0.41643	0.11691	19.15	0.21474	0.12759
12.45	0.03459	0.02371	19.65	0.0443	0.06131	19.65	0.12472	0.0562	19.65	0.12658	0.11277
12.75	0.05862	0.03501	20.15	0.06458	0.08686	20.15	0.39559	0.16614	20.15	0.21681	0.145
13.05	0.04929	0.06188	20.65	0.13204	0.05629	20.65	0.25098	0.11483	20.65	0.11746	0.11288
13.35	0.0294	0.0421	21.15	0.01907	0.19038	21.15	0.19222	0.01838	21.15	-0.00259	0.05805
13.65	-0.08077	0.04996	21.65	0.17053	0.07276	21.65	0.22424	0.09896	21.65	0.20963	0.14549
13.95	-0.00511	0.04729	22.15	0.08607	0.06673	22.15	0.21604	0.11893	22.15	0.07717	0.09726
14.25	0.0126	0.07489	22.65	0.04631	0.00509	22.65	0.18938	0.12887	22.65	-0.00681	0.10101
14.55	0.11457	0.09996	23.65	-0.06923	NaN	23.15	0.51129	0.16283	23.15	0.19571	0.14145
14.85	-0.03379	0.075	25.65	0.13735	NaN	23.65	-0.08168	NaN	23.65	0.10306	0.03526
15.15	0.06059	0.05758				24.15	0.41194	0.09169	24.15	0.22014	0.12337
15.45	-0.12545	0.08551				24.65	0.30208	0.11828	24.65	0.21721	0.12575
15.75	-0.01473	0.05128				25.15	0.68019	NaN	25.15	0.05317	0.03112
16.05	0.0107	0.12787				25.65	0.5989	NaN	25.65	0.17472	NaN
16.35	-0.09925	0.03891				26.15	0.49289	NaN	26.65	-0.15488	NaN
16.65	-0.00789	0.08742				27.65	0.6414	NaN	27.65	0.10181	NaN
16.95	0.12401	NaN							28.15	-0.06219	NaN
									29.65	-0.384	NaN

## Sheet: Figure 5A
601-RH		601-R18-RH		601-R39-RH		601-R56-RH
Time (Min)	Percentage in High FRET	Time (Min)	Percentage in High FRET	Time (Min)	Percentage in High FRET	Time (Min)	Percentage in High FRET
0	1.14	0	2.59	0	2.34	0	2.99
2.333	7.38	2.067	11.49	1.9	20.93	1.933	12.48
3.167	9.71	2.833	11.51	2.717	26.32	2.767	13.18
4.083	10.41	3.967	16.7	4.467	38.7	3.567	14.74
5.033	10.71	5	17.08	5.9	45.28	4.35	16.38
6.983	13.83	6.067	18.8	7.567	51.95	6.35	19.36
9.083	15.79	6.967	21.2	9.467	61.53	9.06	23.73
13.683	18.86	9.75	23.83	11.55	66.24	11.45	26.1
18.467	24.48	12.15	26.53	13.9	71.86	15.417	31.7
23.033	28.03	14.55	26.8	16.617	74.6	18.583	36.13
30.333	34.52	17.983	31.65	19.617	80.58	20.733	38.33
37.417	38.35	19.817	32.28	22.3	83.27	24.167	42.05
43.783	40.77	22.817	34.42	24.05	83.25	27.967	44
52.733	45.48	27.533	38.49	28.7	85.86	32.717	46.62
54.733	43.9	33.133	42.53	33.9	88.17	36.683	48.95
63.1	48.78	40.05	46.18	38.8	88.82	40.767	53.12
69.7	52.7	45.883	51.03	45.567	90.75	44.7	53.67
79.583	54.1	51.267	52.73	51.433	90.39	49.617	59.96
88.75	55.21	58.117	57.55	58.2	92.06	55.517	61.6
103.9	57.12	68.433	63.42			61.267	63.32
123.067	66.3	86.45	66.56			68.667	69.3
137.333	70.6	88.783	66.45			74.333	75.8
150.45	71.9	109.033	72.81			81.033	73.4
160.933	71.65	123.65	74.07			93.883	74.69
180.45	75.64	138.583	78.97			106.883	75.1
		140.7	77.47			117.217	77.4
		155.133	78.54			127.2	80.2
		170.65	80.68			139.8	84.34
		179.15	81.14			154.45	87.1
						169.683	86.34
						179.183	84.8

[truncated: 7 more sheets: Figure 5B, Figure 5C, Figure 6, Figure 7A, Figure 7B, Figure 7C, Figure 5-figure supplement 1]
