# Supplementary material for: Dependence of nucleosome mechanical stability on DNA mismatches
Source: eLife. 2024 Apr 24;13:RP95514. doi: 10.7554/eLife.95514 (PMC11042804; doi:10.7554/eLife.95514)
Supplement: Figure 5—source data 1. [file elife-95514-fig5-data1.xlsx]

## Sheet: Figure 5A
601-RH		601-R18-RH		601-R39-RH		601-R56-RH
Time (Min)	Percentage in High FRET	Time (Min)	Percentage in High FRET	Time (Min)	Percentage in High FRET	Time (Min)	Percentage in High FRET
0	1.14	0	2.59	0	2.34	0	2.99
2.333	7.38	2.067	11.49	1.9	20.93	1.933	12.48
3.167	9.71	2.833	11.51	2.717	26.32	2.767	13.18
4.083	10.41	3.967	16.7	4.467	38.7	3.567	14.74
5.033	10.71	5	17.08	5.9	45.28	4.35	16.38
6.983	13.83	6.067	18.8	7.567	51.95	6.35	19.36
9.083	15.79	6.967	21.2	9.467	61.53	9.06	23.73
13.683	18.86	9.75	23.83	11.55	66.24	11.45	26.1
18.467	24.48	12.15	26.53	13.9	71.86	15.417	31.7
23.033	28.03	14.55	26.8	16.617	74.6	18.583	36.13
30.333	34.52	17.983	31.65	19.617	80.58	20.733	38.33
37.417	38.35	19.817	32.28	22.3	83.27	24.167	42.05
43.783	40.77	22.817	34.42	24.05	83.25	27.967	44
52.733	45.48	27.533	38.49	28.7	85.86	32.717	46.62
54.733	43.9	33.133	42.53	33.9	88.17	36.683	48.95
63.1	48.78	40.05	46.18	38.8	88.82	40.767	53.12
69.7	52.7	45.883	51.03	45.567	90.75	44.7	53.67
79.583	54.1	51.267	52.73	51.433	90.39	49.617	59.96
88.75	55.21	58.117	57.55	58.2	92.06	55.517	61.6
103.9	57.12	68.433	63.42			61.267	63.32
123.067	66.3	86.45	66.56			68.667	69.3
137.333	70.6	88.783	66.45			74.333	75.8
150.45	71.9	109.033	72.81			81.033	73.4
160.933	71.65	123.65	74.07			93.883	74.69
180.45	75.64	138.583	78.97			106.883	75.1
		140.7	77.47			117.217	77.4
		155.133	78.54			127.2	80.2
		170.65	80.68			139.8	84.34
		179.15	81.14			154.45	87.1
						169.683	86.34
						179.183	84.8

## Sheet: Figure 5B
	looping time (min) run1	looping time (min) run2	looping time (min) run3
601-RH	63.4958	54.5142	53.6717
601-R18-RH	29.2518	29.9412	38.417
601-R39-RH	9.8675	8.4743	8.4808
601-R56-RH	32.7251	36.7947	28.4066

## Sheet: Figure 5C
	looping time (min) run1	looping time (min) run2	looping time (min) run3
601-RH-16	4.8894	5.0427	4.5568
601-R18-RH-16	4.0406	3.6077	3.3486
