# Supplementary material for: Dependence of nucleosome mechanical stability on DNA mismatches
Source: eLife. 2024 Apr 24;13:RP95514. doi: 10.7554/eLife.95514 (PMC11042804; doi:10.7554/eLife.95514)
Supplement: Figure 6—source data 1. [file elife-95514-fig6-data1.xlsx]

## Sheet: Figure 6
	E_FRET	Looping Time (Min)	error (high)	error (low)
CC	0.99	9.94	1.3867	0.0065
CA	0.95	14.36	1.12	1.56
CT	0.93	16.94	0.84	0.17
TT	0.98	28.72	3.54	5.4
AA	0.71	23.97	0.58	0.44
GT	0.55	57.853	11.3	5.97
GA	0.38	45.55	5.06	6.4
GG	0.31	53.74	7.14	8.33
Intact	0.27	57.23	6.27	3.555
