# Supplementary material for: Dependence of nucleosome mechanical stability on DNA mismatches
Source: eLife. 2024 Apr 24;13:RP95514. doi: 10.7554/eLife.95514 (PMC11042804; doi:10.7554/eLife.95514)
Supplement: Figure 7—source data 1. [file elife-95514-fig7-data1.xlsx]

## Sheet: Figure 7A
Force (pN) Xenopus	FRET efficiency	error	Force (pN) yeast	FRET efficiency	error
0.45	0.82184	0.0162	0.65	0.69891	NaN
0.75	0.8167	0.01508	1.15	0.70052	0.04472
1.05	0.80844	0.01821	1.65	0.64462	0.03552
1.35	0.77377	0.03233	2.15	0.58279	0.0529
1.65	0.7398	0.02918	2.65	0.35869	0.1046
1.95	0.74033	0.02944	3.15	0.26579	0.10073
2.25	0.62692	0.04414	3.65	0.28613	0.09673
2.55	0.53243	0.05297	4.15	0.12373	0.09543
2.85	0.43621	0.06112	4.65	0.15116	0.07083
3.15	0.38587	0.05939	5.15	0.1748	0.09223
3.45	0.28598	0.06052	5.65	0.11142	0.06364
3.75	0.1897	0.05897	6.15	0.14554	0.07325
4.05	0.1849	0.04621	6.65	0.1982	0.06735
4.65	0.13042	0.04945	7.15	0.15016	0.08152
4.95	0.15335	0.06143	7.65	0.21199	0.04151
5.25	0.12458	0.04659	8.15	0.06567	0.05555
5.55	0.10226	0.03325	8.65	0.0552	0.01861
6.15	0.09903	0.04962	9.15	0.13508	0.05699
6.45	0.04399	0.03356	9.65	0.11081	0.05822
6.75	0.03328	0.03129	10.15	0.05764	0.11723
7.05	0.0823	0.0405	10.65	0.14099	0.0777
7.35	0.09912	0.04635	11.15	0.14328	0.03951
7.65	0.07636	0.02144	11.65	-0.00981	0.02321
7.95	0.03662	0.02787	12.15	0.15409	0.16333
8.25	0.07398	0.04484	12.65	0.0842	0.06688
8.55	0.08207	0.03864	13.15	-0.03066	0.01457
8.85	0.09388	0.05183	13.65	0.04058	0.02189
9.15	0.09323	0.0425	14.15	0.12856	0.06309
9.45	0.00984	0.04392	14.65	-0.00477	0.04677
9.75	0.00235	0.05146	15.15	0.06433	0.04406
10.05	0.01348	0.05058	15.65	0.02612	0.03817
10.35	0.03682	0.05156	16.15	0.16524	0.06045
10.65	0.08192	0.08418	16.65	0.03492	0.02176
10.95	-0.01617	0.04896	17.15	0.25741	0.15896
11.25	0.04996	0.02561	17.65	0.05849	0.02581
11.55	0.0846	0.03106	18.15	-0.03695	0.00493
11.85	0.02948	0.06427	18.65	-0.00905	0.02923
12.15	0.09872	0.06393	19.15	0.13352	0.01032
12.45	0.03459	0.02371	19.65	0.04022	NaN
12.75	0.05862	0.03501	20.15	-0.03384	0.01923
13.05	0.04929	0.06188	20.65	0.02461	0.03365
13.35	0.0294	0.0421	21.15	-0.03511	NaN
13.65	-0.08077	0.04996	21.65	-0.02463	NaN
13.95	-0.00511	0.04729	22.15	0.12691	0.0161
14.25	0.0126	0.07489
14.55	0.11457	0.09996
14.85	-0.03379	0.075
15.15	0.06059	0.05758
15.45	-0.12545	0.08551
15.75	-0.01473	0.05128
16.05	0.0107	0.12787
16.35	-0.09925	0.03891
16.65	-0.00789	0.08742
16.95	0.12401	NaN

## Sheet: Figure 7B
Force (pN) Xenopus	FRET efficiency	error	Force (pN) yeast strong traces	FRET efficiency	error	Force (pN) yeast weak traces	FRET efficiency	error
0.15	0.89466	0.01615	0.65	0.80638	0.01893	1.15	0.84394	0.03586
0.45	0.90912	0.00822	1.15	0.84127	0.01589	1.65	0.82182	0.0316
0.75	0.89173	0.00869	1.65	0.8703	0.01844	2.15	0.83112	0.03018
1.05	0.92422	0.0094	2.15	0.84247	0.01454	2.65	0.81646	0.02391
1.35	0.95416	0.01047	2.65	0.83749	0.02021	3.15	0.72345	0.02894
1.65	0.93585	0.01379	3.15	0.7811	0.01692	3.65	0.52352	0.05466
1.95	0.91526	0.01074	3.65	0.84007	0.02583	4.15	0.53944	0.04566
2.25	0.92265	0.0117	4.15	0.75209	0.03868	4.65	0.45771	0.04847
2.55	0.92487	0.01269	4.65	0.78766	0.04193	5.15	0.33056	0.05932
2.85	0.8712	0.02626	5.15	0.69894	0.03636	5.65	0.06426	0.05603
3.15	0.88978	0.02626	5.65	0.75478	0.03621	6.15	0.11715	0.04965
3.45	0.86877	0.03033	6.15	0.78932	0.04792	6.65	0.2293	0.05169
3.75	0.89202	0.02667	6.65	0.70462	0.04274	7.15	0.09021	0.06167
4.05	0.86596	0.03595	7.15	0.71049	0.04956	7.65	0.13168	0.05365
4.35	0.87757	0.04138	7.65	0.76768	0.07094	8.15	0.08604	0.0511
4.65	0.8785	0.03714	8.15	0.65289	0.04122	8.65	0.18901	0.06078
4.95	0.89932	0.02985	8.65	0.67238	0.05719	9.15	0.15712	0.05667
5.25	0.8615	0.04262	9.15	0.67074	0.05958	9.65	0.12194	0.07137
5.55	0.85999	0.04906	9.65	0.57035	0.07581	10.15	0.10914	0.03928
5.85	0.83784	0.0404	10.15	0.67077	0.06588	10.65	0.07335	0.05811
6.15	0.89041	0.04758	10.65	0.45924	0.07261	11.15	0.11092	0.08084
6.45	0.86484	0.04631	11.15	0.56527	0.07987	11.65	0.08693	0.07212
6.75	0.86707	0.04345	11.65	0.45143	0.0953	12.15	-0.01565	0.10445
7.05	0.87062	0.04752	12.15	0.34656	0.08315	12.65	0.04714	0.07158
7.35	0.91924	0.05521	12.65	0.29878	0.08374	13.15	0.13984	0.06049
7.65	0.86461	0.05036	13.15	0.38284	0.07691	13.65	0.07352	0.05613
7.95	0.88861	0.05369	13.65	0.65158	0.09298	14.15	0.01007	0.03762
8.25	0.88734	0.05103	14.15	0.35692	0.08499	14.65	0.03385	0.08763
8.55	0.87378	0.04753	14.65	0.37216	0.08088	15.15	0.10723	0.07112
8.85	0.82352	0.08542	15.15	0.24439	0.10794	15.65	0.00748	0.07699
9.15	0.9893	0.02521	15.65	0.32236	0.0624	16.15	0.01159	0.00865
9.45	0.88113	0.06109	16.15	0.22469	0.08712	16.65	0.08878	0.07044
9.75	0.87819	0.06682	16.65	0.19455	0.10029	17.15	-0.01928	0.04483
10.05	0.89438	0.02371	17.15	0.13818	0.10138	17.65	0.21353	0.13699
10.35	0.83565	0.08057	17.65	0.20528	0.05817	18.15	0.04055	0.0906
10.65	0.86601	0.06047	18.15	0.13939	0.0942	18.65	0.04907	0.03096
10.95	0.84631	0.07058	18.65	0.2252	0.08517	19.15	-0.10373	NaN
11.25	0.88958	0.08408	19.15	0.02432	0.04421	19.65	0.16642	0.06223
11.55	0.94848	0.02009	19.65	0.17012	0.10618	20.15	0.03565	0.21854
11.85	0.8817	0.08449	20.15	0.01755	0.02719	21.15	0.07022	0.15161
12.15	0.83323	0.0694	20.65	0.06521	0.03804
12.45	0.85226	0.10466	21.15	-0.1058	0.00255
12.75	0.92017	0.03293	21.65	0.04754	0.05135
13.05	0.8284	0.11037	22.15	0.09773	0.02483
13.35	0.86345	0.07259	22.65	0.07393	0.07862
13.65	0.80924	0.07779	23.15	0.11356	0.16093
13.95	0.84347	0.09755	23.65	-0.08814	NaN
14.25	0.6532	0.13614	24.15	-0.00035	0.10972
14.55	0.7445	0.08106	24.65	-0.03202	0.06594
14.85	0.49268	0.14995	25.15	0.14971	0
15.15	0.68515	0.09277	26.15	0.07142	0.07773
15.45	0.66352	0.13782	26.65	0.09578	0
15.75	0.51619	0.14649	27.65	0.03763	0
16.05	0.63621	0.10234	28.15	-0.17308	0.00665
16.35	0.42398	0.12599	28.65	0.00705	0
16.65	0.55772	0.09115	29.15	0.12049	0
16.95	0.29928	0.10623
17.25	0.42556	0.12221
17.55	0.36611	0.12673
17.85	0.51616	0.11102
18.15	0.39998	0.11618
18.45	0.59524	0.29709
19.05	0.30433	NaN
19.65	0.18518	NaN
20.25	0.40409	NaN
20.85	0.02559	NaN
21.45	-0.02092	NaN
21.75	0.25332	NaN

## Sheet: Figure 7C
Force (pN) Xenopus	FRET efficiency	error	Force (pN) yeast	FRET efficiency	error
0.15	0.92187	0.00865	0.65	0.9164	0.0291
0.45	0.94062	0.00615	1.15	0.90757	0.05261
0.75	0.96726	0.00544	1.65	0.81316	0.11428
1.05	0.96548	0.0056	2.15	0.73144	0.10845
1.35	0.98131	0.03683	2.65	0.77393	0.11329
1.65	1.08024	0.0974	3.15	0.82496	0.09821
1.95	0.94421	0.00992	3.65	0.72939	0.11321
2.25	0.94869	0.01112	4.15	0.81919	0.09631
2.55	0.96645	0.01073	4.65	0.70574	0.11012
2.85	0.97794	0.01125	5.15	0.7357	0.09041
3.15	0.9475	0.01123	5.65	0.6372	0.09251
3.45	0.92968	0.01915	6.15	0.56182	0.07963
3.75	0.88564	0.01912	6.65	0.58397	0.08927
4.05	0.89758	0.02176	7.15	0.65585	0.07149
4.35	0.88075	0.02929	7.65	0.6135	0.12724
4.65	0.90999	0.02416	8.15	0.70579	0.10599
4.95	0.89721	0.01908	8.65	0.57793	0.11639
5.25	0.89774	0.02006	9.15	0.60484	0.09174
5.55	0.85482	0.0265	9.65	0.66825	0.19659
5.85	0.8688	0.02325	10.15	0.64613	0.10354
6.15	0.86563	0.02524	10.65	0.5778	0.12712
6.45	0.90491	0.02726	11.15	0.57588	0.10037
6.75	0.85369	0.02512	11.65	0.61976	0.12838
7.05	0.83565	0.02763	12.15	0.59398	0.12166
7.35	0.9085	0.02847	12.65	0.52977	0.08828
7.65	0.91691	0.03287	13.15	0.49438	0.11547
7.95	0.88883	0.01975	13.65	0.78534	0.19457
8.25	0.88214	0.04081	14.15	0.53984	0.13259
8.55	0.86614	0.02789	14.65	0.61939	0.18217
8.85	0.78887	0.06077	15.15	0.57817	0.11558
9.15	0.82454	0.04967	15.65	0.60221	0.17095
9.45	0.79068	0.11466	16.15	0.74356	0.20163
9.75	0.85935	0.04998	16.65	0.62499	0.19513
10.05	0.79734	0.06042	17.15	0.59266	0.1886
10.35	0.77326	0.07774	17.65	0.73904	0.27494
10.65	0.93422	0.02381	18.15	0.59628	0.22593
10.95	0.69717	0.11889	18.65	0.53109	0.17499
11.25	0.7165	0.12415	19.15	0.57515	0.22878
11.55	0.70334	0.10426	19.65	0.29359	0.29634
11.85	0.63216	0.11381	20.15	0.58799	0.27577
12.15	0.57116	0.1812	20.65	0.56179	0.30956
12.45	0.94174	0.02735	21.15	0.44041	0.34985
12.75	0.6573	0.11282	21.65	-0.25407	0.33097
13.05	0.53924	0.12164	22.15	0.2355	0.17164
13.35	0.62343	0.18331	22.65	-0.01196	0.0796
13.65	0.67724	0.11729	23.15	0.01234	0.13528
13.95	0.40023	0.18271	23.65	-0.05467	0.06114
14.25	0.54659	0.17267	24.15	-0.09382	0.07556
14.55	0.45156	0.15607	24.65	-0.50727	NaN
14.85	0.3083	0.18086	25.15	0.04793	0.08685
15.15	0.54019	0.16662	25.65	-0.23708	0.18823
15.45	0.44526	0.14637	26.15	-0.14625	0.07537
15.75	0.33585	0.13928	26.65	-0.19565	NaN
16.05	0.2473	0.15163	27.15	0.10604	0.10977
16.35	0.39835	0.13461	27.65	0.13204	0.09434
16.65	0.321	0.1355	28.15	-0.33548	NaN
16.95	-0.10032	0.03004	28.65	-0.13841	NaN
17.25	0.28155	0.11982	29.15	-0.11343	NaN
17.55	0.10164	0.0535	29.65	-0.09364	NaN
17.85	0.06745	0.03257	30.15	-0.42295	NaN
18.15	0.04265	0.04963
18.45	0.00776	0.01846
18.75	-0.00365	0.03925
19.05	0.0169	0.01325
19.35	-0.04325	0.07172
19.65	-0.00809	0.02294
19.95	-0.01073	0.09166
20.25	-0.000176	0.03959
20.55	0.01981	0.01926
20.85	-0.05341	0.04969
21.15	-0.00204	0.05823
21.45	-0.05808	0.04909
21.75	0.03016	0.06237
22.05	-0.15192	0.09874
22.35	0.07701	0.02491
22.65	-0.05179	0.08489
22.95	0.05665	0.09567
23.25	-0.05614	0.05862
23.55	-0.11134	0.06193
23.85	-0.06447	0.04332
24.45	0.14125	0.04085
